# Supplementary material for: Highly Antiproliferative Latonduine and Indolo[2,3-c]quinoline Derivatives: Complex Formation with Copper(II) Markedly Changes the Kinase Inhibitory Profile
Source: J Med Chem. 2022 Feb 1;65(3):2238–61. doi: 10.1021/acs.jmedchem.1c01740 (PMC8842277; doi:10.1021/acs.jmedchem.1c01740)
Supplement: Supplementary file 5 — jm1c01740_si_005.pdb [file jm1c01740_si_005.pdb]

REMARK   Accelrys ViewerPro PDB file
REMARK   Created:  Sun Dec 19 17:32:41 GMT Standard Time 2021
CRYST1   96.592   96.592   80.556  90.00  90.00 120.00 P65
MODEL        1
ATOM      1  N   PRO A  33      88.733  41.995 -17.896  1.00 44.17              
ATOM      2  CA  PRO A  33      88.258  41.124 -16.773  1.00 44.23              
ATOM      3  C   PRO A  33      89.044  41.394 -15.470  1.00 44.14              
ATOM      4  O   PRO A  33      89.598  42.492 -15.357  1.00 44.13              
ATOM      5  CB  PRO A  33      88.494  39.697 -17.316  1.00 44.37              
ATOM      6  CG  PRO A  33      88.972  39.880 -18.791  1.00 44.07              
ATOM      7  CD  PRO A  33      89.557  41.246 -18.860  1.00 44.07              
ATOM      8  N   LEU A  34      89.063  40.447 -14.520  1.00 44.03              
ATOM      9  CA  LEU A  34      89.822  40.566 -13.251  1.00 43.90              
ATOM     10  C   LEU A  34      88.967  41.072 -12.057  1.00 43.69              
ATOM     11  O   LEU A  34      87.739  40.986 -12.089  1.00 44.14              
ATOM     12  CB  LEU A  34      91.091  41.435 -13.456  1.00 43.69              
ATOM     13  CG  LEU A  34      92.454  40.921 -12.991  1.00 43.70              
ATOM     14  CD1 LEU A  34      92.797  39.583 -13.654  1.00 43.61              
ATOM     15  CD2 LEU A  34      93.532  41.969 -13.306  1.00 43.39              
ATOM     16  N   GLU A  35      89.628  41.545 -10.992  1.00 43.53              
ATOM     17  CA  GLU A  35      88.960  42.126  -9.808  1.00 43.15              
ATOM     18  C   GLU A  35      89.175  43.662  -9.777  1.00 42.43              
ATOM     19  O   GLU A  35      89.407  44.275  -8.722  1.00 41.96              
ATOM     20  CB  GLU A  35      89.446  41.467  -8.501  1.00 43.31              
ATOM     21  CG  GLU A  35      90.901  41.771  -8.128  1.00 44.07              
ATOM     22  CD  GLU A  35      91.749  40.521  -7.922  1.00 45.06              
ATOM     23  OE1 GLU A  35      92.360  40.393  -6.834  1.00 46.16              
ATOM     24  OE2 GLU A  35      91.819  39.675  -8.848  1.00 44.08              
ATOM     25  N   SER A  36      89.148  44.253 -10.971  1.00 41.49              
ATOM     26  CA  SER A  36      89.178  45.699 -11.150  1.00 40.76              
ATOM     27  C   SER A  36      87.758  46.144 -11.495  1.00 39.99              
ATOM     28  O   SER A  36      87.509  47.343 -11.674  1.00 40.10              
ATOM     29  CB  SER A  36      90.119  46.075 -12.284  1.00 40.58              
ATOM     30  OG  SER A  36      91.341  45.377 -12.160  1.00 40.99              
ATOM     31  N   GLN A  37      86.855  45.157 -11.603  1.00 38.67              
ATOM     32  CA  GLN A  37      85.448  45.354 -11.925  1.00 37.82              
ATOM     33  C   GLN A  37      84.599  45.450 -10.670  1.00 37.04              
ATOM     34  O   GLN A  37      83.584  46.138 -10.690  1.00 36.85              
ATOM     35  CB  GLN A  37      84.906  44.188 -12.761  1.00 37.81              
ATOM     36  CG  GLN A  37      85.611  43.940 -14.097  1.00 37.58              
ATOM     37  CD  GLN A  37      85.106  42.676 -14.777  1.00 37.55              
ATOM     38  OE1 GLN A  37      84.012  42.666 -15.340  1.00 38.09              
ATOM     39  NE2 GLN A  37      85.887  41.607 -14.705  1.00 36.57              
ATOM     40  N   TYR A  38      84.989  44.735  -9.605  1.00 36.13              
ATOM     41  CA  TYR A  38      84.266  44.757  -8.319  1.00 35.35              
ATOM     42  C   TYR A  38      85.114  45.267  -7.150  1.00 35.04              
ATOM     43  O   TYR A  38      86.331  45.071  -7.110  1.00 34.79              
ATOM     44  CB  TYR A  38      83.724  43.361  -7.970  1.00 35.01              
ATOM     45  CG  TYR A  38      82.920  42.768  -9.084  1.00 33.68              
ATOM     46  CD1 TYR A  38      81.561  43.030  -9.197  1.00 32.14              
ATOM     47  CD2 TYR A  38      83.519  41.977 -10.050  1.00 32.30              
ATOM     48  CE1 TYR A  38      80.822  42.510 -10.233  1.00 31.56              
ATOM     49  CE2 TYR A  38      82.785  41.454 -11.089  1.00 32.08              
ATOM     50  CZ  TYR A  38      81.440  41.725 -11.175  1.00 31.87              
ATOM     51  OH  TYR A  38      80.701  41.203 -12.209  1.00 35.10              
ATOM     52  N   GLN A  39      84.438  45.910  -6.201  1.00 34.86              
ATOM     53  CA  GLN A  39      85.047  46.425  -4.983  1.00 34.77              
ATOM     54  C   GLN A  39      84.553  45.551  -3.832  1.00 34.40              
ATOM     55  O   GLN A  39      83.355  45.503  -3.555  1.00 34.45              
ATOM     56  CB  GLN A  39      84.646  47.877  -4.756  1.00 34.79              
ATOM     57  CG  GLN A  39      85.600  48.630  -3.845  1.00 35.36              
ATOM     58  CD  GLN A  39      84.927  49.780  -3.120  1.00 36.44              
ATOM     59  OE1 GLN A  39      83.974  49.569  -2.363  1.00 36.77              
ATOM     60  NE2 GLN A  39      85.420  51.000  -3.345  1.00 36.08              
ATOM     61  N   VAL A  40      85.479  44.874  -3.161  1.00 34.12              
ATOM     62  CA  VAL A  40      85.131  43.958  -2.078  1.00 34.12              
ATOM     63  C   VAL A  40      84.723  44.687  -0.803  1.00 34.03              
ATOM     64  O   VAL A  40      85.419  45.586  -0.344  1.00 34.11              
ATOM     65  CB  VAL A  40      86.300  43.011  -1.724  1.00 34.08              
ATOM     66  CG1 VAL A  40      85.866  42.000  -0.655  1.00 34.10              
ATOM     67  CG2 VAL A  40      86.845  42.308  -2.978  1.00 34.27              
ATOM     68  N   GLY A  41      83.604  44.256  -0.228  1.00 34.14              
ATOM     69  CA  GLY A  41      83.074  44.810   1.009  1.00 34.10              
ATOM     70  C   GLY A  41      83.247  43.853   2.184  1.00 34.01              
ATOM     71  O   GLY A  41      84.169  43.036   2.190  1.00 34.35              
ATOM     72  N   PRO A  42      82.381  43.952   3.191  1.00 33.78              
ATOM     73  CA  PRO A  42      82.457  43.067   4.360  1.00 33.66              
ATOM     74  C   PRO A  42      82.018  41.633   4.090  1.00 33.41              
ATOM     75  O   PRO A  42      81.161  41.393   3.242  1.00 33.43              
ATOM     76  CB  PRO A  42      81.471  43.709   5.345  1.00 33.71              
ATOM     77  CG  PRO A  42      81.231  45.091   4.812  1.00 33.90              
ATOM     78  CD  PRO A  42      81.297  44.939   3.333  1.00 33.87              
ATOM     79  N   LEU A  43      82.595  40.686   4.812  1.00 33.08              
ATOM     80  CA  LEU A  43      82.191  39.288   4.691  1.00 33.10              
ATOM     81  C   LEU A  43      80.750  39.159   5.193  1.00 33.22              
ATOM     82  O   LEU A  43      80.435  39.591   6.292  1.00 32.94              
ATOM     83  CB  LEU A  43      83.126  38.419   5.521  1.00 33.11              
ATOM     84  CG  LEU A  43      82.886  36.925   5.689  1.00 33.15              
ATOM     85  CD1 LEU A  43      83.054  36.207   4.376  1.00 33.52              
ATOM     86  CD2 LEU A  43      83.876  36.405   6.733  1.00 33.63              
ATOM     87  N   LEU A  44      79.881  38.566   4.385  1.00 33.54              
ATOM     88  CA  LEU A  44      78.478  38.393   4.746  1.00 33.97              
ATOM     89  C   LEU A  44      78.189  37.071   5.467  1.00 34.61              
ATOM     90  O   LEU A  44      77.297  37.013   6.312  1.00 34.67              
ATOM     91  CB  LEU A  44      77.605  38.521   3.497  1.00 34.11              
ATOM     92  CG  LEU A  44      77.479  39.941   2.936  1.00 34.50              
ATOM     93  CD1 LEU A  44      76.763  39.938   1.574  1.00 34.52              
ATOM     94  CD2 LEU A  44      76.755  40.843   3.933  1.00 35.27              
ATOM     95  N   GLY A  45      78.926  36.015   5.128  1.00 35.48              
ATOM     96  CA  GLY A  45      78.761  34.712   5.768  1.00 35.63              
ATOM     97  C   GLY A  45      79.759  33.654   5.311  1.00 36.25              
ATOM     98  O   GLY A  45      80.485  33.840   4.326  1.00 35.96              
ATOM     99  N   SER A  46      79.830  32.553   6.053  1.00 36.72              
ATOM    100  CA  SER A  46      80.709  31.442   5.680  1.00 37.29              
ATOM    101  C   SER A  46      80.232  30.108   6.272  1.00 37.83              
ATOM    102  O   SER A  46      79.590  30.070   7.311  1.00 38.22              
ATOM    103  CB  SER A  46      82.189  31.734   6.016  1.00 37.57              
ATOM    104  OG  SER A  46      82.598  31.235   7.284  1.00 36.69              
ATOM    105  N   GLY A  47      80.550  29.025   5.571  1.00 38.32              
ATOM    106  CA  GLY A  47      80.151  27.677   5.949  1.00 38.40              
ATOM    107  C   GLY A  47      80.465  26.687   4.828  1.00 38.43              
ATOM    108  O   GLY A  47      81.412  26.889   4.054  1.00 38.11              
ATOM    109  N   GLY A  48      79.659  25.626   4.734  1.00 38.31              
ATOM    110  CA  GLY A  48      79.810  24.614   3.696  1.00 38.06              
ATOM    111  C   GLY A  48      79.581  25.101   2.261  1.00 37.75              
ATOM    112  O   GLY A  48      79.781  24.340   1.309  1.00 38.02              
ATOM    113  N   PHE A  49      79.132  26.345   2.102  1.00 37.20              
ATOM    114  CA  PHE A  49      78.942  26.939   0.774  1.00 36.68              
ATOM    115  C   PHE A  49      80.146  27.772   0.340  1.00 35.73              
ATOM    116  O   PHE A  49      80.256  28.144  -0.816  1.00 36.49              
ATOM    117  CB  PHE A  49      77.684  27.812   0.732  1.00 37.13              
ATOM    118  CG  PHE A  49      77.604  28.865   1.826  1.00 37.05              
ATOM    119  CD1 PHE A  49      78.186  30.118   1.658  1.00 36.35              
ATOM    120  CD2 PHE A  49      76.895  28.610   3.004  1.00 36.78              
ATOM    121  CE1 PHE A  49      78.087  31.082   2.662  1.00 35.48              
ATOM    122  CE2 PHE A  49      76.798  29.568   4.001  1.00 36.43              
ATOM    123  CZ  PHE A  49      77.396  30.805   3.826  1.00 36.31              
ATOM    124  N   GLY A  50      81.046  28.054   1.274  1.00 34.10              
ATOM    125  CA  GLY A  50      82.206  28.895   1.022  1.00 32.47              
ATOM    126  C   GLY A  50      82.102  30.191   1.813  1.00 30.58              
ATOM    127  O   GLY A  50      81.477  30.233   2.862  1.00 30.26              
ATOM    128  N   SER A  51      82.698  31.249   1.282  1.00 28.43              
ATOM    129  CA  SER A  51      82.755  32.554   1.934  1.00 26.27              
ATOM    130  C   SER A  51      82.164  33.564   0.976  1.00 25.44              
ATOM    131  O   SER A  51      82.599  33.662  -0.156  1.00 24.74              
ATOM    132  CB  SER A  51      84.204  32.912   2.232  1.00 26.17              
ATOM    133  OG  SER A  51      84.810  31.979   3.107  1.00 24.24              
ATOM    134  N   VAL A  52      81.162  34.301   1.435  1.00 24.48              
ATOM    135  CA  VAL A  52      80.434  35.259   0.620  1.00 24.10              
ATOM    136  C   VAL A  52      80.619  36.658   1.166  1.00 24.04              
ATOM    137  O   VAL A  52      80.341  36.887   2.325  1.00 24.26              
ATOM    138  CB  VAL A  52      78.939  34.952   0.677  1.00 23.91              
ATOM    139  CG1 VAL A  52      78.130  36.043  -0.027  1.00 23.97              
ATOM    140  CG2 VAL A  52      78.654  33.582   0.077  1.00 24.56              
ATOM    141  N   TYR A  53      81.078  37.581   0.328  1.00 24.29              
ATOM    142  CA  TYR A  53      81.280  38.960   0.718  1.00 24.59              
ATOM    143  C   TYR A  53      80.286  39.868   0.002  1.00 25.42              
ATOM    144  O   TYR A  53      79.744  39.533  -1.044  1.00 25.42              
ATOM    145  CB  TYR A  53      82.695  39.448   0.369  1.00 24.26              
ATOM    146  CG  TYR A  53      83.876  38.700   0.981  1.00 22.48              
ATOM    147  CD1 TYR A  53      84.233  37.441   0.525  1.00 20.88              
ATOM    148  CD2 TYR A  53      84.669  39.285   1.968  1.00 20.57              
ATOM    149  CE1 TYR A  53      85.330  36.766   1.050  1.00 19.85              
ATOM    150  CE2 TYR A  53      85.767  38.610   2.508  1.00 19.73              
ATOM    151  CZ  TYR A  53      86.091  37.351   2.043  1.00 19.44              
ATOM    152  OH  TYR A  53      87.164  36.658   2.556  1.00 18.06              
ATOM    153  N   SER A  54      80.044  41.024   0.595  1.00 26.60              
ATOM    154  CA  SER A  54      79.215  42.050  -0.012  1.00 27.64              
ATOM    155  C   SER A  54      80.153  42.760  -0.963  1.00 27.83              
ATOM    156  O   SER A  54      81.307  42.944  -0.656  1.00 27.91              
ATOM    157  CB  SER A  54      78.678  43.027   1.042  1.00 27.61              
ATOM    158  OG  SER A  54      78.203  44.222   0.446  1.00 28.04              
ATOM    159  N   GLY A  55      79.669  43.114  -2.139  1.00 28.73              
ATOM    160  CA  GLY A  55      80.498  43.779  -3.122  1.00 29.16              
ATOM    161  C   GLY A  55      79.730  44.806  -3.905  1.00 29.65              
ATOM    162  O   GLY A  55      78.532  44.946  -3.747  1.00 29.24              
ATOM    163  N   ILE A  56      80.437  45.521  -4.764  1.00 31.01              
ATOM    164  CA  ILE A  56      79.827  46.554  -5.581  1.00 32.03              
ATOM    165  C   ILE A  56      80.489  46.558  -6.943  1.00 32.42              
ATOM    166  O   ILE A  56      81.697  46.716  -7.043  1.00 32.93              
ATOM    167  CB  ILE A  56      79.956  47.941  -4.866  1.00 32.23              
ATOM    168  CG1 ILE A  56      78.772  48.162  -3.906  1.00 32.59              
ATOM    169  CG2 ILE A  56      80.068  49.096  -5.875  1.00 32.69              
ATOM    170  CD1 ILE A  56      78.849  49.469  -3.085  1.00 32.81              
ATOM    171  N   ARG A  57      79.699  46.354  -7.990  1.00 33.24              
ATOM    172  CA  ARG A  57      80.210  46.426  -9.351  1.00 33.97              
ATOM    173  C   ARG A  57      80.663  47.869  -9.559  1.00 34.38              
ATOM    174  O   ARG A  57      79.846  48.781  -9.512  1.00 34.57              
ATOM    175  CB  ARG A  57      79.126  46.033 -10.362  1.00 34.09              
ATOM    176  CG  ARG A  57      79.674  45.582 -11.726  1.00 34.75              
ATOM    177  CD  ARG A  57      78.672  45.677 -12.878  1.00 34.72              
ATOM    178  NE  ARG A  57      78.059  44.398 -13.229  1.00 34.75              
ATOM    179  CZ  ARG A  57      76.760  44.204 -13.483  1.00 34.02              
ATOM    180  NH1 ARG A  57      75.878  45.202 -13.417  1.00 33.44              
ATOM    181  NH2 ARG A  57      76.338  42.988 -13.808  1.00 34.41              
ATOM    182  N   VAL A  58      81.964  48.073  -9.744  1.00 34.97              
ATOM    183  CA  VAL A  58      82.531  49.421  -9.900  1.00 35.46              
ATOM    184  C   VAL A  58      81.969  50.159 -11.120  1.00 35.58              
ATOM    185  O   VAL A  58      81.743  51.368 -11.059  1.00 35.75              
ATOM    186  CB  VAL A  58      84.096  49.411  -9.951  1.00 35.54              
ATOM    187  CG1 VAL A  58      84.656  50.837 -10.080  1.00 35.74              
ATOM    188  CG2 VAL A  58      84.678  48.740  -8.710  1.00 35.85              
ATOM    189  N   SER A  59      81.715  49.431 -12.202  1.00 35.62              
ATOM    190  CA  SER A  59      81.198  50.037 -13.428  1.00 35.64              
ATOM    191  C   SER A  59      79.870  50.796 -13.280  1.00 35.65              
ATOM    192  O   SER A  59      79.673  51.806 -13.957  1.00 35.46              
ATOM    193  CB  SER A  59      81.061  48.985 -14.530  1.00 35.71              
ATOM    194  OG  SER A  59      80.355  47.860 -14.065  1.00 35.09              
ATOM    195  N   ASP A  60      78.972  50.332 -12.409  1.00 35.55              
ATOM    196  CA  ASP A  60      77.662  50.985 -12.241  1.00 35.44              
ATOM    197  C   ASP A  60      77.119  51.028 -10.803  1.00 35.18              
ATOM    198  O   ASP A  60      75.919  51.217 -10.599  1.00 35.08              
ATOM    199  CB  ASP A  60      76.633  50.297 -13.155  1.00 35.58              
ATOM    200  CG  ASP A  60      76.151  48.975 -12.602  1.00 35.80              
ATOM    201  OD1 ASP A  60      76.952  48.294 -11.943  1.00 37.80              
ATOM    202  OD2 ASP A  60      74.993  48.536 -12.761  1.00 35.57              
ATOM    203  N   ASN A  61      78.002  50.887  -9.817  1.00 34.96              
ATOM    204  CA  ASN A  61      77.618  50.849  -8.398  1.00 34.63              
ATOM    205  C   ASN A  61      76.481  49.870  -8.092  1.00 34.01              
ATOM    206  O   ASN A  61      75.606  50.152  -7.273  1.00 34.53              
ATOM    207  CB  ASN A  61      77.263  52.252  -7.901  1.00 34.57              
ATOM    208  CG  ASN A  61      78.421  53.206  -8.001  1.00 35.13              
ATOM    209  OD1 ASN A  61      79.575  52.789  -8.123  1.00 36.04              
ATOM    210  ND2 ASN A  61      78.128  54.503  -7.955  1.00 35.88              
ATOM    211  N   LEU A  62      76.505  48.707  -8.737  1.00 33.34              
ATOM    212  CA  LEU A  62      75.484  47.684  -8.512  1.00 32.22              
ATOM    213  C   LEU A  62      75.816  46.806  -7.305  1.00 31.38              
ATOM    214  O   LEU A  62      76.916  46.281  -7.219  1.00 31.79              
ATOM    215  CB  LEU A  62      75.340  46.777  -9.734  1.00 32.07              
ATOM    216  CG  LEU A  62      74.295  45.655  -9.612  1.00 31.69              
ATOM    217  CD1 LEU A  62      72.867  46.199  -9.701  1.00 31.74              
ATOM    218  CD2 LEU A  62      74.490  44.543 -10.648  1.00 30.72              
ATOM    219  N   PRO A  63      74.883  46.657  -6.370  1.00 29.91              
ATOM    220  CA  PRO A  63      75.075  45.730  -5.252  1.00 28.81              
ATOM    221  C   PRO A  63      75.248  44.286  -5.730  1.00 27.28              
ATOM    222  O   PRO A  63      74.384  43.787  -6.440  1.00 26.80              
ATOM    223  CB  PRO A  63      73.763  45.855  -4.460  1.00 28.66              
ATOM    224  CG  PRO A  63      73.129  47.131  -4.889  1.00 29.48              
ATOM    225  CD  PRO A  63      73.615  47.405  -6.259  1.00 30.09              
ATOM    226  N   VAL A  64      76.357  43.643  -5.382  1.00 25.83              
ATOM    227  CA  VAL A  64      76.563  42.228  -5.706  1.00 25.14              
ATOM    228  C   VAL A  64      77.059  41.438  -4.486  1.00 24.46              
ATOM    229  O   VAL A  64      77.433  42.017  -3.470  1.00 24.18              
ATOM    230  CB  VAL A  64      77.570  42.033  -6.860  1.00 25.19              
ATOM    231  CG1 VAL A  64      77.099  42.765  -8.125  1.00 25.19              
ATOM    232  CG2 VAL A  64      78.954  42.495  -6.469  1.00 25.41              
ATOM    233  N   ALA A  65      77.038  40.112  -4.595  1.00 23.36              
ATOM    234  CA  ALA A  65      77.582  39.218  -3.571  1.00 22.63              
ATOM    235  C   ALA A  65      78.688  38.401  -4.264  1.00 22.01              
ATOM    236  O   ALA A  65      78.472  37.817  -5.331  1.00 21.63              
ATOM    237  CB  ALA A  65      76.473  38.293  -2.988  1.00 22.50              
ATOM    238  N   ILE A  66      79.869  38.372  -3.676  1.00 21.92              
ATOM    239  CA  ILE A  66      81.010  37.667  -4.246  1.00 21.94              
ATOM    240  C   ILE A  66      81.198  36.411  -3.420  1.00 22.05              
ATOM    241  O   ILE A  66      81.526  36.492  -2.234  1.00 21.28              
ATOM    242  CB  ILE A  66      82.255  38.569  -4.208  1.00 22.38              
ATOM    243  CG1 ILE A  66      82.001  39.858  -5.005  1.00 23.30              
ATOM    244  CG2 ILE A  66      83.487  37.872  -4.794  1.00 22.20              
ATOM    245  CD1 ILE A  66      83.045  40.913  -4.799  1.00 23.09              
ATOM    246  N   LYS A  67      80.947  35.257  -4.041  1.00 21.42              
ATOM    247  CA  LYS A  67      81.091  33.952  -3.391  1.00 21.46              
ATOM    248  C   LYS A  67      82.373  33.234  -3.838  1.00 21.39              
ATOM    249  O   LYS A  67      82.631  33.076  -5.038  1.00 21.51              
ATOM    250  CB  LYS A  67      79.887  33.093  -3.731  1.00 21.67              
ATOM    251  CG  LYS A  67      79.820  31.767  -3.010  1.00 22.71              
ATOM    252  CD  LYS A  67      78.576  31.023  -3.452  1.00 24.96              
ATOM    253  CE  LYS A  67      78.251  29.859  -2.520  1.00 27.26              
ATOM    254  NZ  LYS A  67      77.006  29.144  -2.968  1.00 25.98              
ATOM    255  N   HIS A  68      83.167  32.798  -2.875  1.00 21.24              
ATOM    256  CA  HIS A  68      84.395  32.070  -3.129  1.00 21.04              
ATOM    257  C   HIS A  68      84.230  30.607  -2.733  1.00 22.27              
ATOM    258  O   HIS A  68      83.856  30.321  -1.604  1.00 22.98              
ATOM    259  CB  HIS A  68      85.533  32.691  -2.322  1.00 20.61              
ATOM    260  CG  HIS A  68      85.842  34.100  -2.710  1.00 18.29              
ATOM    261  ND1 HIS A  68      86.905  34.431  -3.510  1.00 15.86              
ATOM    262  CD2 HIS A  68      85.207  35.261  -2.429  1.00 15.94              
ATOM    263  CE1 HIS A  68      86.928  35.738  -3.693  1.00 16.84              
ATOM    264  NE2 HIS A  68      85.896  36.262  -3.061  1.00 16.27              
ATOM    265  N   VAL A  69      84.469  29.686  -3.659  1.00 23.78              
ATOM    266  CA  VAL A  69      84.413  28.251  -3.375  1.00 25.82              
ATOM    267  C   VAL A  69      85.767  27.597  -3.698  1.00 27.06              
ATOM    268  O   VAL A  69      86.293  27.781  -4.791  1.00 26.74              
ATOM    269  CB  VAL A  69      83.301  27.549  -4.192  1.00 26.27              
ATOM    270  CG1 VAL A  69      83.011  26.163  -3.607  1.00 27.06              
ATOM    271  CG2 VAL A  69      82.033  28.386  -4.210  1.00 26.50              
ATOM    272  N   GLU A  70      86.335  26.853  -2.747  1.00 28.87              
ATOM    273  CA  GLU A  70      87.636  26.178  -2.955  1.00 30.51              
ATOM    274  C   GLU A  70      87.479  24.946  -3.858  1.00 31.23              
ATOM    275  O   GLU A  70      86.533  24.175  -3.696  1.00 31.62              
ATOM    276  CB  GLU A  70      88.253  25.746  -1.609  1.00 30.92              
ATOM    277  CG  GLU A  70      88.520  26.894  -0.626  1.00 31.96              
ATOM    278  CD  GLU A  70      89.832  26.783   0.129  1.00 33.17              
ATOM    279  OE1 GLU A  70      90.743  26.078  -0.346  1.00 36.63              
ATOM    280  OE2 GLU A  70      89.972  27.423   1.200  1.00 34.45              
ATOM    281  N   LYS A  71      88.389  24.764  -4.811  1.00 32.60              
ATOM    282  CA  LYS A  71      88.323  23.611  -5.714  1.00 33.42              
ATOM    283  C   LYS A  71      88.376  22.270  -4.973  1.00 34.79              
ATOM    284  O   LYS A  71      87.691  21.334  -5.368  1.00 35.10              
ATOM    285  CB  LYS A  71      89.400  23.688  -6.799  1.00 33.07              
ATOM    286  CG  LYS A  71      89.085  24.724  -7.886  1.00 32.20              
ATOM    287  CD  LYS A  71      89.927  24.557  -9.145  1.00 30.61              
ATOM    288  CE  LYS A  71      90.169  25.900  -9.837  1.00 30.20              
ATOM    289  NZ  LYS A  71      91.048  25.808 -11.056  1.00 28.18              
ATOM    290  N   ASP A  72      89.146  22.190  -3.888  1.00 36.35              
ATOM    291  CA  ASP A  72      89.251  20.953  -3.090  1.00 37.63              
ATOM    292  C   ASP A  72      87.935  20.594  -2.379  1.00 38.78              
ATOM    293  O   ASP A  72      87.684  19.430  -2.065  1.00 39.04              
ATOM    294  CB  ASP A  72      90.367  21.062  -2.048  1.00 37.80              
ATOM    295  CG  ASP A  72      91.578  21.822  -2.559  1.00 38.99              
ATOM    296  OD1 ASP A  72      92.464  21.198  -3.198  1.00 38.69              
ATOM    297  OD2 ASP A  72      91.711  23.057  -2.377  1.00 40.11              
ATOM    298  N   ARG A  73      87.110  21.599  -2.112  1.00 39.83              
ATOM    299  CA  ARG A  73      85.814  21.386  -1.470  1.00 41.03              
ATOM    300  C   ARG A  73      84.678  21.141  -2.480  1.00 41.25              
ATOM    301  O   ARG A  73      83.533  20.925  -2.091  1.00 41.46              
ATOM    302  CB  ARG A  73      85.472  22.578  -0.551  1.00 41.49              
ATOM    303  CG  ARG A  73      86.106  22.517   0.851  1.00 42.45              
ATOM    304  CD  ARG A  73      85.184  22.927   2.039  1.00 45.05              
ATOM    305  NE  ARG A  73      83.729  22.897   1.794  1.00 45.89              
ATOM    306  CZ  ARG A  73      82.997  21.793   1.587  1.00 47.60              
ATOM    307  NH1 ARG A  73      83.566  20.593   1.562  1.00 48.41              
ATOM    308  NH2 ARG A  73      81.684  21.890   1.380  1.00 46.89              
ATOM    309  N   ILE A  74      84.971  21.184  -3.775  1.00 41.64              
ATOM    310  CA  ILE A  74      83.925  20.933  -4.760  1.00 41.75              
ATOM    311  C   ILE A  74      83.912  19.448  -5.098  1.00 41.88              
ATOM    312  O   ILE A  74      84.795  18.956  -5.794  1.00 41.96              
ATOM    313  CB  ILE A  74      84.123  21.796  -6.023  1.00 41.55              
ATOM    314  CG1 ILE A  74      83.880  23.268  -5.701  1.00 41.82              
ATOM    315  CG2 ILE A  74      83.163  21.368  -7.124  1.00 41.80              
ATOM    316  CD1 ILE A  74      84.596  24.218  -6.650  1.00 42.33              
ATOM    317  N   SER A  75      82.917  18.734  -4.589  1.00 42.30              
ATOM    318  CA  SER A  75      82.776  17.304  -4.877  1.00 42.64              
ATOM    319  C   SER A  75      81.990  17.096  -6.175  1.00 42.76              
ATOM    320  O   SER A  75      82.315  16.218  -6.971  1.00 43.08              
ATOM    321  CB  SER A  75      82.095  16.575  -3.704  1.00 42.63              
ATOM    322  OG  SER A  75      80.743  16.980  -3.546  1.00 42.09              
ATOM    323  N   ASP A  76      80.970  17.925  -6.385  1.00 42.89              
ATOM    324  CA  ASP A  76      80.108  17.833  -7.559  1.00 43.32              
ATOM    325  C   ASP A  76      80.536  18.776  -8.677  1.00 42.99              
ATOM    326  O   ASP A  76      80.418  19.997  -8.566  1.00 42.85              
ATOM    327  CB  ASP A  76      78.661  18.146  -7.169  1.00 43.69              
ATOM    328  CG  ASP A  76      77.758  16.940  -7.264  1.00 45.38              
ATOM    329  OD1 ASP A  76      76.565  17.143  -7.600  1.00 48.03              
ATOM    330  OD2 ASP A  76      78.142  15.769  -7.014  1.00 46.41              
ATOM    331  N   TRP A  77      81.035  18.190  -9.754  1.00 42.97              
ATOM    332  CA  TRP A  77      81.472  18.934 -10.918  1.00 42.54              
ATOM    333  C   TRP A  77      80.544  18.610 -12.068  1.00 42.94              
ATOM    334  O   TRP A  77      80.025  17.495 -12.171  1.00 42.73              
ATOM    335  CB  TRP A  77      82.876  18.526 -11.310  1.00 42.40              
ATOM    336  CG  TRP A  77      83.909  18.982 -10.389  1.00 41.12              
ATOM    337  CD1 TRP A  77      84.363  18.333  -9.287  1.00 40.39              
ATOM    338  CD2 TRP A  77      84.660  20.188 -10.488  1.00 39.94              
ATOM    339  NE1 TRP A  77      85.349  19.067  -8.681  1.00 40.34              
ATOM    340  CE2 TRP A  77      85.549  20.216  -9.399  1.00 39.90              
ATOM    341  CE3 TRP A  77      84.668  21.260 -11.387  1.00 39.54              
ATOM    342  CZ2 TRP A  77      86.440  21.262  -9.186  1.00 39.78              
ATOM    343  CZ3 TRP A  77      85.549  22.300 -11.172  1.00 39.87              
ATOM    344  CH2 TRP A  77      86.427  22.291 -10.081  1.00 39.95              
ATOM    345  N   GLY A  78      80.341  19.604 -12.924  1.00 43.27              
ATOM    346  CA  GLY A  78      79.503  19.477 -14.097  1.00 43.49              
ATOM    347  C   GLY A  78      80.219  20.058 -15.291  1.00 43.94              
ATOM    348  O   GLY A  78      81.316  20.614 -15.182  1.00 43.70              
ATOM    349  N   GLU A  79      79.590  19.919 -16.444  1.00 44.71              
ATOM    350  CA  GLU A  79      80.161  20.423 -17.683  1.00 45.43              
ATOM    351  C   GLU A  79      79.226  21.495 -18.214  1.00 45.83              
ATOM    352  O   GLU A  79      77.997  21.317 -18.234  1.00 45.73              
ATOM    353  CB  GLU A  79      80.440  19.298 -18.720  1.00 45.60              
ATOM    354  CG  GLU A  79      79.331  18.257 -18.951  1.00 45.81              
ATOM    355  CD  GLU A  79      78.471  18.556 -20.178  1.00 46.31              
ATOM    356  OE1 GLU A  79      78.971  18.382 -21.315  1.00 45.86              
ATOM    357  OE2 GLU A  79      77.293  18.964 -20.007  1.00 45.40              
ATOM    358  N   LEU A  80      79.815  22.626 -18.597  1.00 46.38              
ATOM    359  CA  LEU A  80      79.055  23.742 -19.132  1.00 46.68              
ATOM    360  C   LEU A  80      78.489  23.355 -20.489  1.00 47.32              
ATOM    361  O   LEU A  80      79.046  22.470 -21.160  1.00 46.98              
ATOM    362  CB  LEU A  80      79.957  24.972 -19.302  1.00 46.80              
ATOM    363  CG  LEU A  80      80.075  25.937 -18.124  1.00 45.81              
ATOM    364  CD1 LEU A  80      80.982  27.095 -18.502  1.00 45.35              
ATOM    365  CD2 LEU A  80      78.716  26.452 -17.692  1.00 45.68              
ATOM    366  N   PRO A  81      77.380  23.987 -20.890  1.00 47.75              
ATOM    367  CA  PRO A  81      76.800  23.728 -22.217  1.00 47.81              
ATOM    368  C   PRO A  81      77.879  23.630 -23.305  1.00 47.66              
ATOM    369  O   PRO A  81      77.876  22.651 -24.050  1.00 47.94              
ATOM    370  CB  PRO A  81      75.881  24.940 -22.438  1.00 47.95              
ATOM    371  CG  PRO A  81      75.417  25.316 -21.041  1.00 47.78              
ATOM    372  CD  PRO A  81      76.578  24.961 -20.120  1.00 47.72              
ATOM    373  N   ASN A  82      78.802  24.595 -23.354  1.00 47.36              
ATOM    374  CA  ASN A  82      79.877  24.599 -24.359  1.00 47.08              
ATOM    375  C   ASN A  82      80.960  23.526 -24.115  1.00 46.58              
ATOM    376  O   ASN A  82      81.695  23.163 -25.028  1.00 46.07              
ATOM    377  CB  ASN A  82      80.490  26.008 -24.504  1.00 47.21              
ATOM    378  CG  ASN A  82      81.702  26.223 -23.615  1.00 47.45              
ATOM    379  OD1 ASN A  82      82.835  26.266 -24.098  1.00 48.34              
ATOM    380  ND2 ASN A  82      81.472  26.355 -22.315  1.00 46.71              
ATOM    381  N   GLY A  83      81.066  23.042 -22.880  1.00 46.16              
ATOM    382  CA  GLY A  83      81.992  21.971 -22.542  1.00 45.84              
ATOM    383  C   GLY A  83      83.249  22.425 -21.819  1.00 45.40              
ATOM    384  O   GLY A  83      84.318  22.575 -22.440  1.00 45.43              
ATOM    385  N   THR A  84      83.108  22.652 -20.510  1.00 44.65              
ATOM    386  CA  THR A  84      84.225  23.048 -19.633  1.00 44.00              
ATOM    387  C   THR A  84      84.010  22.590 -18.171  1.00 43.17              
ATOM    388  O   THR A  84      82.882  22.408 -17.708  1.00 43.07              
ATOM    389  CB  THR A  84      84.476  24.586 -19.679  1.00 44.04              
ATOM    390  OG1 THR A  84      84.361  25.078 -21.022  1.00 43.48              
ATOM    391  CG2 THR A  84      85.919  24.919 -19.290  1.00 43.85              
ATOM    392  N   ARG A  85      85.116  22.400 -17.461  1.00 42.31              
ATOM    393  CA  ARG A  85      85.087  21.966 -16.074  1.00 41.50              
ATOM    394  C   ARG A  85      84.763  23.150 -15.147  1.00 40.55              
ATOM    395  O   ARG A  85      85.567  24.081 -15.020  1.00 40.46              
ATOM    396  CB  ARG A  85      86.438  21.329 -15.693  1.00 41.80              
ATOM    397  CG  ARG A  85      86.373  20.307 -14.541  1.00 42.68              
ATOM    398  CD  ARG A  85      87.047  18.947 -14.842  1.00 43.68              
ATOM    399  NE  ARG A  85      86.670  17.909 -13.872  1.00 44.16              
ATOM    400  CZ  ARG A  85      85.484  17.286 -13.818  1.00 45.10              
ATOM    401  NH1 ARG A  85      84.507  17.571 -14.677  1.00 45.20              
ATOM    402  NH2 ARG A  85      85.266  16.364 -12.885  1.00 45.93              
ATOM    403  N   VAL A  86      83.565  23.120 -14.549  1.00 39.02              
ATOM    404  CA  VAL A  86      83.117  24.117 -13.562  1.00 37.94              
ATOM    405  C   VAL A  86      82.258  23.450 -12.486  1.00 36.72              
ATOM    406  O   VAL A  86      81.684  22.396 -12.719  1.00 36.58              
ATOM    407  CB  VAL A  86      82.274  25.271 -14.190  1.00 37.89              
ATOM    408  CG1 VAL A  86      82.969  25.855 -15.409  1.00 38.02              
ATOM    409  CG2 VAL A  86      80.867  24.810 -14.544  1.00 37.70              
ATOM    410  N   PRO A  87      82.168  24.053 -11.306  1.00 35.56              
ATOM    411  CA  PRO A  87      81.290  23.533 -10.248  1.00 34.68              
ATOM    412  C   PRO A  87      79.868  23.248 -10.760  1.00 33.95              
ATOM    413  O   PRO A  87      79.387  23.974 -11.631  1.00 33.64              
ATOM    414  CB  PRO A  87      81.262  24.676  -9.225  1.00 34.97              
ATOM    415  CG  PRO A  87      82.562  25.418  -9.431  1.00 34.96              
ATOM    416  CD  PRO A  87      82.916  25.251 -10.876  1.00 35.49              
ATOM    417  N   MET A  88      79.218  22.201 -10.258  1.00 32.83              
ATOM    418  CA  MET A  88      77.859  21.885 -10.696  1.00 32.20              
ATOM    419  C   MET A  88      77.019  23.110 -10.371  1.00 30.67              
ATOM    420  O   MET A  88      76.158  23.520 -11.146  1.00 29.26              
ATOM    421  CB  MET A  88      77.322  20.649  -9.972  1.00 32.89              
ATOM    422  CG  MET A  88      75.873  20.277 -10.289  1.00 35.25              
ATOM    423  SD  MET A  88      75.479  20.030 -12.040  1.00 41.48              
ATOM    424  CE  MET A  88      76.629  18.699 -12.487  1.00 39.76              
ATOM    425  N   GLU A  89      77.316  23.693  -9.210  1.00 29.33              
ATOM    426  CA  GLU A  89      76.675  24.916  -8.746  1.00 27.76              
ATOM    427  C   GLU A  89      76.577  25.993  -9.829  1.00 26.69              
ATOM    428  O   GLU A  89      75.564  26.683  -9.921  1.00 26.24              
ATOM    429  CB  GLU A  89      77.459  25.470  -7.570  1.00 27.39              
ATOM    430  CG  GLU A  89      76.725  26.575  -6.853  1.00 27.08              
ATOM    431  CD  GLU A  89      77.506  27.161  -5.716  1.00 26.28              
ATOM    432  OE1 GLU A  89      78.586  26.645  -5.346  1.00 27.43              
ATOM    433  OE2 GLU A  89      77.029  28.175  -5.214  1.00 28.26              
ATOM    434  N   VAL A  90      77.632  26.148 -10.631  1.00 25.94              
ATOM    435  CA  VAL A  90      77.639  27.130 -11.723  1.00 24.84              
ATOM    436  C   VAL A  90      76.688  26.704 -12.837  1.00 24.68              
ATOM    437  O   VAL A  90      75.937  27.518 -13.385  1.00 23.82              
ATOM    438  CB  VAL A  90      79.048  27.317 -12.303  1.00 25.33              
ATOM    439  CG1 VAL A  90      78.993  27.953 -13.691  1.00 24.53              
ATOM    440  CG2 VAL A  90      79.901  28.154 -11.354  1.00 24.96              
ATOM    441  N   VAL A  91      76.733  25.422 -13.167  1.00 24.10              
ATOM    442  CA  VAL A  91      75.884  24.855 -14.199  1.00 24.22              
ATOM    443  C   VAL A  91      74.417  25.062 -13.847  1.00 23.56              
ATOM    444  O   VAL A  91      73.610  25.454 -14.684  1.00 23.54              
ATOM    445  CB  VAL A  91      76.197  23.342 -14.386  1.00 24.06              
ATOM    446  CG1 VAL A  91      75.187  22.661 -15.287  1.00 23.95              
ATOM    447  CG2 VAL A  91      77.600  23.164 -14.915  1.00 24.93              
ATOM    448  N   LEU A  92      74.090  24.841 -12.587  1.00 23.72              
ATOM    449  CA  LEU A  92      72.727  24.972 -12.105  1.00 23.31              
ATOM    450  C   LEU A  92      72.243  26.401 -12.112  1.00 23.48              
ATOM    451  O   LEU A  92      71.121  26.677 -12.556  1.00 22.33              
ATOM    452  CB  LEU A  92      72.612  24.399 -10.692  1.00 23.66              
ATOM    453  CG  LEU A  92      72.939  22.904 -10.655  1.00 24.14              
ATOM    454  CD1 LEU A  92      72.800  22.353  -9.282  1.00 23.26              
ATOM    455  CD2 LEU A  92      72.072  22.114 -11.697  1.00 25.22              
ATOM    456  N   LEU A  93      73.086  27.297 -11.608  1.00 23.81              
ATOM    457  CA  LEU A  93      72.787  28.725 -11.539  1.00 24.64              
ATOM    458  C   LEU A  93      72.486  29.312 -12.913  1.00 25.23              
ATOM    459  O   LEU A  93      71.554  30.117 -13.065  1.00 25.43              
ATOM    460  CB  LEU A  93      73.940  29.488 -10.850  1.00 24.61              
ATOM    461  CG  LEU A  93      73.925  29.401  -9.302  1.00 24.51              
ATOM    462  CD1 LEU A  93      75.256  29.819  -8.693  1.00 24.39              
ATOM    463  CD2 LEU A  93      72.833  30.278  -8.737  1.00 25.14              
ATOM    464  N   LYS A  94      73.266  28.913 -13.915  1.00 26.31              
ATOM    465  CA  LYS A  94      73.060  29.382 -15.283  1.00 26.59              
ATOM    466  C   LYS A  94      71.724  28.915 -15.822  1.00 27.18              
ATOM    467  O   LYS A  94      71.037  29.667 -16.512  1.00 26.41              
ATOM    468  CB  LYS A  94      74.129  28.839 -16.207  1.00 27.04              
ATOM    469  CG  LYS A  94      75.429  29.558 -16.115  1.00 27.98              
ATOM    470  CD  LYS A  94      76.559  28.708 -16.688  1.00 30.11              
ATOM    471  CE  LYS A  94      77.367  29.470 -17.728  1.00 29.93              
ATOM    472  NZ  LYS A  94      77.404  30.934 -17.451  1.00 30.60              
ATOM    473  N   LYS A  95      71.374  27.661 -15.516  1.00 27.58              
ATOM    474  CA  LYS A  95      70.118  27.087 -15.978  1.00 28.22              
ATOM    475  C   LYS A  95      68.896  27.787 -15.351  1.00 28.59              
ATOM    476  O   LYS A  95      67.865  27.861 -15.996  1.00 29.15              
ATOM    477  CB  LYS A  95      70.066  25.568 -15.742  1.00 27.73              
ATOM    478  CG  LYS A  95      71.016  24.763 -16.600  1.00 28.39              
ATOM    479  CD  LYS A  95      70.886  23.250 -16.377  1.00 29.17              
ATOM    480  CE  LYS A  95      69.558  22.683 -16.932  1.00 30.31              
ATOM    481  NZ  LYS A  95      69.736  21.439 -17.739  1.00 29.68              
ATOM    482  N   VAL A  96      68.994  28.279 -14.113  1.00 29.42              
ATOM    483  CA  VAL A  96      67.860  28.983 -13.485  1.00 30.31              
ATOM    484  C   VAL A  96      67.889  30.505 -13.697  1.00 31.53              
ATOM    485  O   VAL A  96      66.971  31.207 -13.275  1.00 31.33              
ATOM    486  CB  VAL A  96      67.718  28.714 -11.961  1.00 29.96              
ATOM    487  CG1 VAL A  96      67.480  27.253 -11.679  1.00 27.76              
ATOM    488  CG2 VAL A  96      68.920  29.229 -11.205  1.00 30.92              
ATOM    489  N   SER A  97      68.925  31.000 -14.362  1.00 32.45              
ATOM    490  CA  SER A  97      69.071  32.426 -14.608  1.00 34.35              
ATOM    491  C   SER A  97      68.011  33.010 -15.553  1.00 35.36              
ATOM    492  O   SER A  97      67.954  32.685 -16.741  1.00 35.64              
ATOM    493  CB  SER A  97      70.457  32.734 -15.179  1.00 34.45              
ATOM    494  OG  SER A  97      70.370  33.748 -16.161  1.00 35.10              
ATOM    495  N   SER A  98      67.173  33.878 -15.010  1.00 36.94              
ATOM    496  CA  SER A  98      66.181  34.583 -15.814  1.00 37.99              
ATOM    497  C   SER A  98      65.800  35.919 -15.139  1.00 38.36              
ATOM    498  O   SER A  98      66.361  36.281 -14.084  1.00 38.32              
ATOM    499  CB  SER A  98      64.957  33.695 -16.072  1.00 38.28              
ATOM    500  OG  SER A  98      64.000  33.808 -15.031  1.00 40.13              
ATOM    501  N   GLY A  99      64.878  36.650 -15.768  1.00 38.12              
ATOM    502  CA  GLY A  99      64.368  37.902 -15.225  1.00 38.10              
ATOM    503  C   GLY A  99      63.490  37.688 -14.000  1.00 37.81              
ATOM    504  O   GLY A  99      63.168  38.650 -13.286  1.00 38.07              
ATOM    505  N   PHE A 100      63.073  36.434 -13.793  1.00 37.23              
ATOM    506  CA  PHE A 100      62.297  36.027 -12.629  1.00 36.76              
ATOM    507  C   PHE A 100      63.172  36.199 -11.395  1.00 36.30              
ATOM    508  O   PHE A 100      64.226  35.590 -11.273  1.00 36.21              
ATOM    509  CB  PHE A 100      61.840  34.571 -12.754  1.00 36.50              
ATOM    510  CG  PHE A 100      61.181  34.041 -11.515  1.00 37.66              
ATOM    511  CD1 PHE A 100      59.994  34.606 -11.046  1.00 37.96              
ATOM    512  CD2 PHE A 100      61.761  32.996 -10.789  1.00 37.72              
ATOM    513  CE1 PHE A 100      59.385  34.129  -9.884  1.00 38.15              
ATOM    514  CE2 PHE A 100      61.153  32.503  -9.646  1.00 37.32              
ATOM    515  CZ  PHE A 100      59.962  33.068  -9.181  1.00 37.91              
ATOM    516  N   SER A 101      62.713  37.027 -10.472  1.00 35.80              
ATOM    517  CA  SER A 101      63.490  37.359  -9.294  1.00 35.34              
ATOM    518  C   SER A 101      63.418  36.349  -8.135  1.00 34.10              
ATOM    519  O   SER A 101      64.001  36.604  -7.078  1.00 34.41              
ATOM    520  CB  SER A 101      63.074  38.761  -8.800  1.00 35.74              
ATOM    521  OG  SER A 101      61.661  38.891  -8.635  1.00 36.67              
ATOM    522  N   GLY A 102      62.719  35.225  -8.313  1.00 32.37              
ATOM    523  CA  GLY A 102      62.572  34.251  -7.240  1.00 31.22              
ATOM    524  C   GLY A 102      63.793  33.403  -6.944  1.00 30.25              
ATOM    525  O   GLY A 102      63.822  32.696  -5.959  1.00 29.53              
ATOM    526  N   VAL A 103      64.779  33.444  -7.827  1.00 29.93              
ATOM    527  CA  VAL A 103      66.017  32.727  -7.615  1.00 29.73              
ATOM    528  C   VAL A 103      67.151  33.700  -7.834  1.00 29.24              
ATOM    529  O   VAL A 103      67.066  34.595  -8.662  1.00 28.88              
ATOM    530  CB  VAL A 103      66.156  31.520  -8.554  1.00 29.87              
ATOM    531  CG1 VAL A 103      67.478  30.806  -8.289  1.00 31.24              
ATOM    532  CG2 VAL A 103      64.981  30.566  -8.361  1.00 29.43              
ATOM    533  N   ILE A 104      68.207  33.532  -7.060  1.00 29.26              
ATOM    534  CA  ILE A 104      69.352  34.405  -7.148  1.00 29.00              
ATOM    535  C   ILE A 104      69.905  34.297  -8.544  1.00 28.58              
ATOM    536  O   ILE A 104      69.899  33.225  -9.135  1.00 28.27              
ATOM    537  CB  ILE A 104      70.404  33.982  -6.128  1.00 29.63              
ATOM    538  CG1 ILE A 104      71.366  35.139  -5.878  1.00 31.27              
ATOM    539  CG2 ILE A 104      71.122  32.647  -6.558  1.00 28.59              
ATOM    540  CD1 ILE A 104      70.806  36.169  -4.868  1.00 32.18              
ATOM    541  N   ARG A 105      70.388  35.406  -9.073  1.00 28.48              
ATOM    542  CA  ARG A 105      70.926  35.419 -10.416  1.00 28.34              
ATOM    543  C   ARG A 105      72.448  35.507 -10.393  1.00 27.17              
ATOM    544  O   ARG A 105      73.033  36.331  -9.682  1.00 26.41              
ATOM    545  CB  ARG A 105      70.331  36.578 -11.178  1.00 28.99              
ATOM    546  CG  ARG A 105      70.243  36.355 -12.658  1.00 33.27              
ATOM    547  CD  ARG A 105      70.998  37.395 -13.512  1.00 38.08              
ATOM    548  NE  ARG A 105      70.137  38.457 -14.044  1.00 41.17              
ATOM    549  CZ  ARG A 105      69.142  38.273 -14.912  1.00 43.29              
ATOM    550  NH1 ARG A 105      68.849  37.060 -15.375  1.00 44.99              
ATOM    551  NH2 ARG A 105      68.424  39.316 -15.318  1.00 43.77              
ATOM    552  N   LEU A 106      73.080  34.628 -11.155  1.00 26.58              
ATOM    553  CA  LEU A 106      74.529  34.622 -11.304  1.00 26.31              
ATOM    554  C   LEU A 106      74.846  35.594 -12.421  1.00 25.98              
ATOM    555  O   LEU A 106      74.507  35.323 -13.560  1.00 25.88              
ATOM    556  CB  LEU A 106      75.013  33.217 -11.682  1.00 26.09              
ATOM    557  CG  LEU A 106      76.499  33.085 -12.007  1.00 25.72              
ATOM    558  CD1 LEU A 106      77.328  33.395 -10.756  1.00 26.01              
ATOM    559  CD2 LEU A 106      76.814  31.687 -12.556  1.00 25.19              
ATOM    560  N   LEU A 107      75.487  36.713 -12.095  1.00 25.72              
ATOM    561  CA  LEU A 107      75.845  37.762 -13.068  1.00 26.25              
ATOM    562  C   LEU A 107      77.158  37.528 -13.819  1.00 25.93              
ATOM    563  O   LEU A 107      77.361  38.040 -14.928  1.00 25.88              
ATOM    564  CB  LEU A 107      75.918  39.115 -12.351  1.00 26.39              
ATOM    565  CG  LEU A 107      74.635  39.514 -11.609  1.00 27.84              
ATOM    566  CD1 LEU A 107      74.869  40.639 -10.615  1.00 28.77              
ATOM    567  CD2 LEU A 107      73.545  39.911 -12.603  1.00 29.28              
ATOM    568  N   ASP A 108      78.031  36.736 -13.210  1.00 25.99              
ATOM    569  CA  ASP A 108      79.350  36.446 -13.748  1.00 25.59              
ATOM    570  C   ASP A 108      80.057  35.447 -12.828  1.00 25.25              
ATOM    571  O   ASP A 108      79.631  35.211 -11.689  1.00 24.45              
ATOM    572  CB  ASP A 108      80.172  37.750 -13.811  1.00 25.73              
ATOM    573  CG  ASP A 108      81.246  37.737 -14.896  1.00 26.21              
ATOM    574  OD1 ASP A 108      81.507  36.675 -15.516  1.00 26.20              
ATOM    575  OD2 ASP A 108      81.896  38.766 -15.179  1.00 27.23              
ATOM    576  N   TRP A 109      81.134  34.858 -13.333  1.00 24.85              
ATOM    577  CA  TRP A 109      81.971  33.936 -12.565  1.00 24.97              
ATOM    578  C   TRP A 109      83.421  33.984 -13.098  1.00 24.47              
ATOM    579  O   TRP A 109      83.668  34.496 -14.187  1.00 24.47              
ATOM    580  CB  TRP A 109      81.389  32.513 -12.575  1.00 24.93              
ATOM    581  CG  TRP A 109      81.389  31.888 -13.920  1.00 26.95              
ATOM    582  CD1 TRP A 109      80.388  31.931 -14.850  1.00 28.41              
ATOM    583  CD2 TRP A 109      82.453  31.136 -14.513  1.00 28.95              
ATOM    584  NE1 TRP A 109      80.762  31.244 -15.983  1.00 29.11              
ATOM    585  CE2 TRP A 109      82.028  30.751 -15.806  1.00 29.16              
ATOM    586  CE3 TRP A 109      83.728  30.747 -14.084  1.00 30.19              
ATOM    587  CZ2 TRP A 109      82.827  29.994 -16.667  1.00 30.86              
ATOM    588  CZ3 TRP A 109      84.536  29.999 -14.950  1.00 31.74              
ATOM    589  CH2 TRP A 109      84.078  29.630 -16.224  1.00 31.46              
ATOM    590  N   PHE A 110      84.367  33.475 -12.308  1.00 24.09              
ATOM    591  CA  PHE A 110      85.801  33.485 -12.636  1.00 23.81              
ATOM    592  C   PHE A 110      86.487  32.238 -12.068  1.00 23.23              
ATOM    593  O   PHE A 110      86.092  31.753 -11.009  1.00 21.27              
ATOM    594  CB  PHE A 110      86.490  34.734 -12.051  1.00 24.04              
ATOM    595  CG  PHE A 110      85.896  36.034 -12.510  1.00 25.57              
ATOM    596  CD1 PHE A 110      86.433  36.712 -13.596  1.00 28.07              
ATOM    597  CD2 PHE A 110      84.792  36.577 -11.857  1.00 27.43              
ATOM    598  CE1 PHE A 110      85.882  37.917 -14.032  1.00 28.96              
ATOM    599  CE2 PHE A 110      84.229  37.764 -12.282  1.00 28.03              
ATOM    600  CZ  PHE A 110      84.782  38.448 -13.376  1.00 29.30              
ATOM    601  N   GLU A 111      87.488  31.712 -12.792  1.00 22.89              
ATOM    602  CA  GLU A 111      88.282  30.569 -12.321  1.00 22.96              
ATOM    603  C   GLU A 111      89.643  31.100 -11.883  1.00 22.91              
ATOM    604  O   GLU A 111      90.313  31.824 -12.624  1.00 22.57              
ATOM    605  CB  GLU A 111      88.486  29.482 -13.397  1.00 23.42              
ATOM    606  CG  GLU A 111      89.049  28.174 -12.821  1.00 23.36              
ATOM    607  CD  GLU A 111      89.496  27.160 -13.869  1.00 21.98              
ATOM    608  OE1 GLU A 111      90.477  27.428 -14.562  1.00 25.92              
ATOM    609  OE2 GLU A 111      88.912  26.068 -13.979  1.00 20.10              
ATOM    610  N   ARG A 112      90.026  30.736 -10.665  1.00 22.95              
ATOM    611  CA  ARG A 112      91.285  31.138 -10.048  1.00 22.90              
ATOM    612  C   ARG A 112      92.081  29.861  -9.843  1.00 22.92              
ATOM    613  O   ARG A 112      91.531  28.765 -10.012  1.00 22.49              
ATOM    614  CB  ARG A 112      91.010  31.813  -8.701  1.00 23.21              
ATOM    615  CG  ARG A 112      91.116  33.326  -8.710  1.00 23.09              
ATOM    616  CD  ARG A 112      90.700  33.940  -7.390  1.00 22.53              
ATOM    617  NE  ARG A 112      90.791  35.397  -7.381  1.00 23.01              
ATOM    618  CZ  ARG A 112      90.459  36.163  -6.348  1.00 22.47              
ATOM    619  NH1 ARG A 112      90.012  35.613  -5.233  1.00 21.64              
ATOM    620  NH2 ARG A 112      90.582  37.485  -6.423  1.00 22.85              
ATOM    621  N   PRO A 113      93.367  29.986  -9.507  1.00 22.93              
ATOM    622  CA  PRO A 113      94.223  28.816  -9.277  1.00 23.03              
ATOM    623  C   PRO A 113      93.575  27.685  -8.478  1.00 23.25              
ATOM    624  O   PRO A 113      93.483  26.577  -9.006  1.00 23.63              
ATOM    625  CB  PRO A 113      95.426  29.411  -8.534  1.00 23.31              
ATOM    626  CG  PRO A 113      95.560  30.790  -9.108  1.00 23.11              
ATOM    627  CD  PRO A 113      94.127  31.244  -9.372  1.00 22.88              
ATOM    628  N   ASP A 114      93.099  27.966  -7.264  1.00 23.27              
ATOM    629  CA  ASP A 114      92.494  26.944  -6.407  1.00 23.12              
ATOM    630  C   ASP A 114      91.060  27.249  -5.988  1.00 22.08              
ATOM    631  O   ASP A 114      90.566  26.644  -5.053  1.00 22.51              
ATOM    632  CB  ASP A 114      93.336  26.736  -5.137  1.00 23.60              
ATOM    633  CG  ASP A 114      94.827  26.807  -5.397  1.00 25.00              
ATOM    634  OD1 ASP A 114      95.530  27.497  -4.625  1.00 27.93              
ATOM    635  OD2 ASP A 114      95.389  26.219  -6.349  1.00 27.02              
ATOM    636  N   SER A 115      90.395  28.182  -6.661  1.00 21.08              
ATOM    637  CA  SER A 115      89.011  28.510  -6.335  1.00 20.33              
ATOM    638  C   SER A 115      88.240  29.086  -7.514  1.00 20.00              
ATOM    639  O   SER A 115      88.823  29.500  -8.505  1.00 19.66              
ATOM    640  CB  SER A 115      88.976  29.555  -5.228  1.00 20.03              
ATOM    641  OG  SER A 115      89.635  30.739  -5.658  1.00 20.17              
ATOM    642  N   PHE A 116      86.923  29.086  -7.366  1.00 19.57              
ATOM    643  CA  PHE A 116      85.989  29.731  -8.281  1.00 19.66              
ATOM    644  C   PHE A 116      85.332  30.866  -7.539  1.00 18.88              
ATOM    645  O   PHE A 116      85.053  30.747  -6.344  1.00 18.66              
ATOM    646  CB  PHE A 116      84.911  28.756  -8.738  1.00 19.87              
ATOM    647  CG  PHE A 116      85.398  27.814  -9.779  1.00 20.87              
ATOM    648  CD1 PHE A 116      86.050  26.647  -9.422  1.00 21.33              
ATOM    649  CD2 PHE A 116      85.283  28.130 -11.116  1.00 19.48              
ATOM    650  CE1 PHE A 116      86.524  25.793 -10.402  1.00 20.95              
ATOM    651  CE2 PHE A 116      85.733  27.286 -12.063  1.00 18.27              
ATOM    652  CZ  PHE A 116      86.367  26.122 -11.715  1.00 19.38              
ATOM    653  N   VAL A 117      85.134  31.979  -8.228  1.00 19.00              
ATOM    654  CA  VAL A 117      84.443  33.119  -7.667  1.00 19.24              
ATOM    655  C   VAL A 117      83.205  33.398  -8.514  1.00 19.66              
ATOM    656  O   VAL A 117      83.281  33.533  -9.730  1.00 19.54              
ATOM    657  CB  VAL A 117      85.305  34.363  -7.573  1.00 19.20              
ATOM    658  CG1 VAL A 117      84.563  35.429  -6.801  1.00 19.44              
ATOM    659  CG2 VAL A 117      86.633  34.044  -6.899  1.00 19.55              
ATOM    660  N   LEU A 118      82.078  33.502  -7.829  1.00 19.88              
ATOM    661  CA  LEU A 118      80.769  33.706  -8.419  1.00 20.54              
ATOM    662  C   LEU A 118      80.265  35.101  -8.019  1.00 20.95              
ATOM    663  O   LEU A 118      80.325  35.481  -6.853  1.00 20.98              
ATOM    664  CB  LEU A 118      79.829  32.632  -7.857  1.00 20.22              
ATOM    665  CG  LEU A 118      79.757  31.267  -8.533  1.00 21.04              
ATOM    666  CD1 LEU A 118      81.105  30.671  -8.872  1.00 19.69              
ATOM    667  CD2 LEU A 118      78.935  30.332  -7.661  1.00 20.32              
ATOM    668  N   ILE A 119      79.787  35.870  -8.983  1.00 21.52              
ATOM    669  CA  ILE A 119      79.264  37.202  -8.723  1.00 22.05              
ATOM    670  C   ILE A 119      77.773  37.024  -8.780  1.00 22.96              
ATOM    671  O   ILE A 119      77.227  36.710  -9.823  1.00 23.26              
ATOM    672  CB  ILE A 119      79.742  38.219  -9.780  1.00 21.95              
ATOM    673  CG1 ILE A 119      81.255  38.080 -10.031  1.00 21.39              
ATOM    674  CG2 ILE A 119      79.355  39.657  -9.379  1.00 22.01              
ATOM    675  CD1 ILE A 119      82.147  38.351  -8.841  1.00 22.00              
ATOM    676  N   LEU A 120      77.109  37.224  -7.656  1.00 24.24              
ATOM    677  CA  LEU A 120      75.672  37.026  -7.581  1.00 25.86              
ATOM    678  C   LEU A 120      74.980  38.336  -7.301  1.00 27.08              
ATOM    679  O   LEU A 120      75.587  39.265  -6.805  1.00 27.57              
ATOM    680  CB  LEU A 120      75.377  35.998  -6.503  1.00 25.82              
ATOM    681  CG  LEU A 120      75.947  34.631  -6.878  1.00 26.79              
ATOM    682  CD1 LEU A 120      76.569  33.958  -5.688  1.00 29.37              
ATOM    683  CD2 LEU A 120      74.851  33.754  -7.448  1.00 26.76              
ATOM    684  N   GLU A 121      73.704  38.434  -7.639  1.00 28.42              
ATOM    685  CA  GLU A 121      73.001  39.684  -7.388  1.00 29.38              
ATOM    686  C   GLU A 121      72.815  39.834  -5.878  1.00 29.09              
ATOM    687  O   GLU A 121      72.879  38.864  -5.147  1.00 28.89              
ATOM    688  CB  GLU A 121      71.685  39.743  -8.157  1.00 29.82              
ATOM    689  CG  GLU A 121      70.546  39.039  -7.494  1.00 31.52              
ATOM    690  CD  GLU A 121      69.388  38.801  -8.437  1.00 33.93              
ATOM    691  OE1 GLU A 121      68.956  39.755  -9.129  1.00 37.01              
ATOM    692  OE2 GLU A 121      68.896  37.667  -8.466  1.00 31.84              
ATOM    693  N   ARG A 122      72.659  41.065  -5.412  1.00 29.33              
ATOM    694  CA  ARG A 122      72.480  41.295  -3.988  1.00 29.37              
ATOM    695  C   ARG A 122      71.400  42.336  -3.701  1.00 29.50              
ATOM    696  O   ARG A 122      71.611  43.534  -3.907  1.00 29.19              
ATOM    697  CB  ARG A 122      73.805  41.728  -3.337  1.00 29.10              
ATOM    698  CG  ARG A 122      73.669  42.157  -1.863  1.00 28.74              
ATOM    699  CD  ARG A 122      74.994  42.224  -1.099  1.00 27.41              
ATOM    700  NE  ARG A 122      75.865  43.304  -1.574  1.00 25.69              
ATOM    701  CZ  ARG A 122      75.681  44.594  -1.295  1.00 24.47              
ATOM    702  NH1 ARG A 122      74.670  44.983  -0.523  1.00 25.39              
ATOM    703  NH2 ARG A 122      76.523  45.500  -1.774  1.00 22.40              
ATOM    704  N   PRO A 123      70.240  41.881  -3.232  1.00 30.11              
ATOM    705  CA  PRO A 123      69.186  42.810  -2.807  1.00 30.14              
ATOM    706  C   PRO A 123      69.667  43.573  -1.565  1.00 30.33              
ATOM    707  O   PRO A 123      70.449  43.046  -0.766  1.00 29.95              
ATOM    708  CB  PRO A 123      67.992  41.904  -2.495  1.00 29.91              
ATOM    709  CG  PRO A 123      68.417  40.497  -2.816  1.00 29.92              
ATOM    710  CD  PRO A 123      69.852  40.468  -3.089  1.00 29.76              
ATOM    711  N   GLU A 124      69.214  44.811  -1.426  1.00 30.92              
ATOM    712  CA  GLU A 124      69.653  45.695  -0.338  1.00 31.11              
ATOM    713  C   GLU A 124      68.502  46.669  -0.030  1.00 30.25              
ATOM    714  O   GLU A 124      68.131  47.437  -0.896  1.00 30.55              
ATOM    715  CB  GLU A 124      70.922  46.437  -0.809  1.00 31.78              
ATOM    716  CG  GLU A 124      71.642  47.357   0.186  1.00 34.39              
ATOM    717  CD  GLU A 124      72.705  48.255  -0.489  1.00 38.26              
ATOM    718  OE1 GLU A 124      72.339  49.168  -1.285  1.00 40.17              
ATOM    719  OE2 GLU A 124      73.925  48.073  -0.225  1.00 40.07              
ATOM    720  N   PRO A 125      67.914  46.655   1.170  1.00 29.56              
ATOM    721  CA  PRO A 125      68.285  45.777   2.277  1.00 29.02              
ATOM    722  C   PRO A 125      67.734  44.366   2.115  1.00 28.40              
ATOM    723  O   PRO A 125      66.779  44.134   1.389  1.00 28.63              
ATOM    724  CB  PRO A 125      67.631  46.457   3.475  1.00 28.94              
ATOM    725  CG  PRO A 125      66.395  47.052   2.911  1.00 28.72              
ATOM    726  CD  PRO A 125      66.796  47.541   1.544  1.00 29.63              
ATOM    727  N   VAL A 126      68.356  43.441   2.824  1.00 28.23              
ATOM    728  CA  VAL A 126      68.021  42.032   2.773  1.00 28.30              
ATOM    729  C   VAL A 126      68.270  41.384   4.132  1.00 28.02              
ATOM    730  O   VAL A 126      69.077  41.857   4.928  1.00 27.78              
ATOM    731  CB  VAL A 126      68.868  41.321   1.644  1.00 28.64              
ATOM    732  CG1 VAL A 126      70.320  41.061   2.092  1.00 28.98              
ATOM    733  CG2 VAL A 126      68.230  40.052   1.182  1.00 29.98              
ATOM    734  N   GLN A 127      67.512  40.339   4.425  1.00 27.75              
ATOM    735  CA  GLN A 127      67.737  39.531   5.607  1.00 27.40              
ATOM    736  C   GLN A 127      67.321  38.113   5.219  1.00 27.51              
ATOM    737  O   GLN A 127      66.293  37.933   4.582  1.00 27.67              
ATOM    738  CB  GLN A 127      66.936  40.021   6.814  1.00 27.28              
ATOM    739  CG  GLN A 127      67.329  39.256   8.099  1.00 27.00              
ATOM    740  CD  GLN A 127      66.552  39.681   9.318  1.00 27.36              
ATOM    741  OE1 GLN A 127      65.355  39.944   9.227  1.00 27.61              
ATOM    742  NE2 GLN A 127      67.229  39.752  10.464  1.00 24.71              
ATOM    743  N   ASP A 128      68.125  37.114   5.562  1.00 27.52              
ATOM    744  CA  ASP A 128      67.775  35.733   5.239  1.00 28.03              
ATOM    745  C   ASP A 128      66.699  35.257   6.223  1.00 27.02              
ATOM    746  O   ASP A 128      66.587  35.783   7.332  1.00 26.12              
ATOM    747  CB  ASP A 128      69.012  34.818   5.174  1.00 28.53              
ATOM    748  CG  ASP A 128      69.538  34.404   6.552  1.00 32.55              
ATOM    749  OD1 ASP A 128      68.746  34.095   7.474  1.00 34.97              
ATOM    750  OD2 ASP A 128      70.759  34.333   6.800  1.00 40.24              
ATOM    751  N   LEU A 129      65.947  34.247   5.815  1.00 26.58              
ATOM    752  CA  LEU A 129      64.799  33.794   6.565  1.00 26.31              
ATOM    753  C   LEU A 129      65.113  33.239   7.943  1.00 26.18              
ATOM    754  O   LEU A 129      64.309  33.406   8.856  1.00 25.68              
ATOM    755  CB  LEU A 129      63.963  32.807   5.728  1.00 26.00              
ATOM    756  CG  LEU A 129      62.660  32.332   6.382  1.00 24.39              
ATOM    757  CD1 LEU A 129      61.729  33.468   6.665  1.00 24.09              
ATOM    758  CD2 LEU A 129      62.013  31.330   5.473  1.00 25.67              
ATOM    759  N   PHE A 130      66.273  32.593   8.097  1.00 26.80              
ATOM    760  CA  PHE A 130      66.712  32.050   9.386  1.00 26.76              
ATOM    761  C   PHE A 130      66.859  33.155  10.405  1.00 26.93              
ATOM    762  O   PHE A 130      66.359  33.040  11.518  1.00 27.39              
ATOM    763  CB  PHE A 130      68.021  31.253   9.252  1.00 27.10              
ATOM    764  CG  PHE A 130      68.509  30.670  10.550  1.00 28.04              
ATOM    765  CD1 PHE A 130      69.252  31.442  11.441  1.00 30.06              
ATOM    766  CD2 PHE A 130      68.212  29.351  10.893  1.00 29.69              
ATOM    767  CE1 PHE A 130      69.689  30.911  12.677  1.00 31.31              
ATOM    768  CE2 PHE A 130      68.634  28.806  12.111  1.00 32.25              
ATOM    769  CZ  PHE A 130      69.386  29.589  13.009  1.00 31.77              
ATOM    770  N   ASP A 131      67.555  34.227  10.029  1.00 26.96              
ATOM    771  CA  ASP A 131      67.743  35.397  10.891  1.00 27.05              
ATOM    772  C   ASP A 131      66.409  36.104  11.167  1.00 26.43              
ATOM    773  O   ASP A 131      66.195  36.612  12.264  1.00 26.53              
ATOM    774  CB  ASP A 131      68.701  36.426  10.247  1.00 26.77              
ATOM    775  CG  ASP A 131      70.143  35.954  10.186  1.00 28.12              
ATOM    776  OD1 ASP A 131      70.490  34.916  10.802  1.00 29.98              
ATOM    777  OD2 ASP A 131      71.012  36.589   9.548  1.00 28.01              
ATOM    778  N   PHE A 132      65.533  36.135  10.165  1.00 26.16              
ATOM    779  CA  PHE A 132      64.228  36.791  10.278  1.00 25.85              
ATOM    780  C   PHE A 132      63.386  36.092  11.340  1.00 26.27              
ATOM    781  O   PHE A 132      62.805  36.739  12.192  1.00 26.01              
ATOM    782  CB  PHE A 132      63.519  36.801   8.902  1.00 25.79              
ATOM    783  CG  PHE A 132      62.202  37.530   8.888  1.00 24.96              
ATOM    784  CD1 PHE A 132      62.157  38.903   8.661  1.00 26.29              
ATOM    785  CD2 PHE A 132      60.997  36.850   9.086  1.00 25.10              
ATOM    786  CE1 PHE A 132      60.927  39.599   8.649  1.00 27.23              
ATOM    787  CE2 PHE A 132      59.767  37.529   9.069  1.00 24.85              
ATOM    788  CZ  PHE A 132      59.733  38.909   8.854  1.00 26.92              
ATOM    789  N   ILE A 133      63.394  34.765  11.322  1.00 26.76              
ATOM    790  CA  ILE A 133      62.628  33.951  12.255  1.00 27.65              
ATOM    791  C   ILE A 133      63.289  33.981  13.622  1.00 28.98              
ATOM    792  O   ILE A 133      62.614  33.999  14.657  1.00 28.85              
ATOM    793  CB  ILE A 133      62.507  32.499  11.720  1.00 27.37              
ATOM    794  CG1 ILE A 133      61.456  32.446  10.616  1.00 27.37              
ATOM    795  CG2 ILE A 133      62.143  31.532  12.828  1.00 29.42              
ATOM    796  CD1 ILE A 133      61.586  31.297   9.679  1.00 27.87              
ATOM    797  N   THR A 134      64.614  33.991  13.629  1.00 30.15              
ATOM    798  CA  THR A 134      65.347  34.062  14.867  1.00 31.57              
ATOM    799  C   THR A 134      64.948  35.311  15.645  1.00 32.67              
ATOM    800  O   THR A 134      64.797  35.262  16.849  1.00 33.40              
ATOM    801  CB  THR A 134      66.857  34.087  14.596  1.00 31.75              
ATOM    802  OG1 THR A 134      67.278  32.817  14.079  1.00 31.43              
ATOM    803  CG2 THR A 134      67.658  34.262  15.898  1.00 31.44              
ATOM    804  N   GLU A 135      64.775  36.422  14.943  1.00 33.62              
ATOM    805  CA  GLU A 135      64.449  37.694  15.580  1.00 34.45              
ATOM    806  C   GLU A 135      62.966  37.810  15.891  1.00 34.67              
ATOM    807  O   GLU A 135      62.588  38.217  16.985  1.00 33.60              
ATOM    808  CB  GLU A 135      64.842  38.856  14.656  1.00 34.94              
ATOM    809  CG  GLU A 135      66.256  39.396  14.847  1.00 36.40              
ATOM    810  CD  GLU A 135      66.367  40.829  14.368  1.00 37.51              
ATOM    811  OE1 GLU A 135      65.992  41.062  13.193  1.00 34.69              
ATOM    812  OE2 GLU A 135      66.782  41.715  15.178  1.00 39.46              
ATOM    813  N   ARG A 136      62.127  37.396  14.938  1.00 34.89              
ATOM    814  CA  ARG A 136      60.681  37.594  15.060  1.00 35.47              
ATOM    815  C   ARG A 136      59.864  36.429  15.583  1.00 34.76              
ATOM    816  O   ARG A 136      58.679  36.578  15.856  1.00 34.55              
ATOM    817  CB  ARG A 136      60.147  38.070  13.719  1.00 36.10              
ATOM    818  CG  ARG A 136      60.771  39.423  13.364  1.00 39.22              
ATOM    819  CD  ARG A 136      60.419  39.933  11.999  1.00 42.15              
ATOM    820  NE  ARG A 136      59.003  40.312  11.929  1.00 44.11              
ATOM    821  CZ  ARG A 136      58.522  41.385  11.291  1.00 45.19              
ATOM    822  NH1 ARG A 136      59.321  42.238  10.645  1.00 44.24              
ATOM    823  NH2 ARG A 136      57.211  41.600  11.303  1.00 46.48              
ATOM    824  N   GLY A 137      60.514  35.295  15.792  1.00 34.28              
ATOM    825  CA  GLY A 137      59.832  34.097  16.235  1.00 33.64              
ATOM    826  C   GLY A 137      58.853  33.645  15.176  1.00 32.75              
ATOM    827  O   GLY A 137      58.888  34.110  14.035  1.00 33.57              
ATOM    828  N   ALA A 138      57.979  32.731  15.564  1.00 31.63              
ATOM    829  CA  ALA A 138      56.920  32.214  14.717  1.00 30.37              
ATOM    830  C   ALA A 138      56.182  33.304  13.959  1.00 29.60              
ATOM    831  O   ALA A 138      55.734  34.286  14.550  1.00 28.98              
ATOM    832  CB  ALA A 138      55.922  31.435  15.565  1.00 30.31              
ATOM    833  N   LEU A 139      56.021  33.089  12.657  1.00 28.16              
ATOM    834  CA  LEU A 139      55.347  34.022  11.778  1.00 27.88              
ATOM    835  C   LEU A 139      53.833  33.863  11.734  1.00 27.49              
ATOM    836  O   LEU A 139      53.295  32.752  11.759  1.00 26.71              
ATOM    837  CB  LEU A 139      55.844  33.828  10.357  1.00 28.25              
ATOM    838  CG  LEU A 139      57.354  33.809  10.139  1.00 28.86              
ATOM    839  CD1 LEU A 139      57.594  33.764   8.662  1.00 28.59              
ATOM    840  CD2 LEU A 139      58.012  35.010  10.762  1.00 29.43              
ATOM    841  N   GLN A 140      53.142  34.990  11.639  1.00 27.02              
ATOM    842  CA  GLN A 140      51.695  34.963  11.493  1.00 27.03              
ATOM    843  C   GLN A 140      51.463  34.248  10.174  1.00 26.14              
ATOM    844  O   GLN A 140      52.239  34.390   9.226  1.00 24.88              
ATOM    845  CB  GLN A 140      51.102  36.365  11.435  1.00 27.19              
ATOM    846  CG  GLN A 140      51.211  37.154  12.722  1.00 29.87              
ATOM    847  CD  GLN A 140      50.793  38.608  12.536  1.00 33.19              
ATOM    848  OE1 GLN A 140      50.641  39.073  11.405  1.00 35.09              
ATOM    849  NE2 GLN A 140      50.601  39.323  13.641  1.00 34.26              
ATOM    850  N   GLU A 141      50.379  33.501  10.111  1.00 25.61              
ATOM    851  CA  GLU A 141      50.082  32.694   8.937  1.00 25.21              
ATOM    852  C   GLU A 141      49.978  33.457   7.630  1.00 24.91              
ATOM    853  O   GLU A 141      50.431  32.967   6.637  1.00 25.40              
ATOM    854  CB  GLU A 141      48.838  31.857   9.212  1.00 26.15              
ATOM    855  CG  GLU A 141      49.148  30.768  10.243  1.00 26.11              
ATOM    856  CD  GLU A 141      48.071  29.723  10.356  1.00 25.54              
ATOM    857  OE1 GLU A 141      47.467  29.297   9.336  1.00 25.06              
ATOM    858  OE2 GLU A 141      47.842  29.326  11.489  1.00 24.44              
ATOM    859  N   GLU A 142      49.399  34.658   7.622  1.00 25.37              
ATOM    860  CA  GLU A 142      49.303  35.467   6.396  1.00 25.14              
ATOM    861  C   GLU A 142      50.700  35.718   5.797  1.00 24.76              
ATOM    862  O   GLU A 142      50.898  35.658   4.570  1.00 24.72              
ATOM    863  CB  GLU A 142      48.597  36.792   6.700  1.00 25.42              
ATOM    864  CG  GLU A 142      48.471  37.759   5.539  1.00 24.85              
ATOM    865  CD  GLU A 142      47.722  39.022   5.942  1.00 27.32              
ATOM    866  OE1 GLU A 142      48.324  39.877   6.653  1.00 28.71              
ATOM    867  OE2 GLU A 142      46.533  39.146   5.573  1.00 26.38              
ATOM    868  N   LEU A 143      51.658  35.972   6.679  1.00 23.79              
ATOM    869  CA  LEU A 143      53.042  36.162   6.301  1.00 23.49              
ATOM    870  C   LEU A 143      53.640  34.837   5.867  1.00 23.64              
ATOM    871  O   LEU A 143      54.289  34.783   4.828  1.00 24.40              
ATOM    872  CB  LEU A 143      53.866  36.760   7.461  1.00 23.61              
ATOM    873  CG  LEU A 143      55.347  37.080   7.163  1.00 22.76              
ATOM    874  CD1 LEU A 143      55.476  38.021   5.958  1.00 20.17              
ATOM    875  CD2 LEU A 143      56.025  37.697   8.379  1.00 25.64              
ATOM    876  N   ALA A 144      53.436  33.759   6.633  1.00 23.70              
ATOM    877  CA  ALA A 144      53.980  32.458   6.234  1.00 24.07              
ATOM    878  C   ALA A 144      53.427  32.081   4.872  1.00 24.26              
ATOM    879  O   ALA A 144      54.159  31.589   4.040  1.00 25.06              
ATOM    880  CB  ALA A 144      53.701  31.371   7.252  1.00 24.58              
ATOM    881  N   ARG A 145      52.141  32.342   4.640  1.00 24.06              
ATOM    882  CA  ARG A 145      51.507  32.033   3.365  1.00 23.84              
ATOM    883  C   ARG A 145      52.184  32.761   2.186  1.00 23.69              
ATOM    884  O   ARG A 145      52.412  32.159   1.129  1.00 23.73              
ATOM    885  CB  ARG A 145      50.008  32.382   3.424  1.00 23.98              
ATOM    886  CG  ARG A 145      49.263  32.308   2.073  1.00 23.97              
ATOM    887  CD  ARG A 145      47.751  32.590   2.167  1.00 26.06              
ATOM    888  NE  ARG A 145      47.164  31.847   3.274  1.00 28.29              
ATOM    889  CZ  ARG A 145      46.747  32.349   4.440  1.00 29.68              
ATOM    890  NH1 ARG A 145      46.778  33.644   4.700  1.00 30.51              
ATOM    891  NH2 ARG A 145      46.286  31.515   5.369  1.00 29.33              
ATOM    892  N   SER A 146      52.479  34.048   2.358  1.00 22.97              
ATOM    893  CA  SER A 146      53.121  34.846   1.297  1.00 23.70              
ATOM    894  C   SER A 146      54.535  34.344   1.041  1.00 23.35              
ATOM    895  O   SER A 146      54.945  34.215  -0.115  1.00 23.30              
ATOM    896  CB  SER A 146      53.151  36.332   1.648  1.00 24.16              
ATOM    897  OG  SER A 146      53.768  37.090   0.620  1.00 25.36              
ATOM    898  N   PHE A 147      55.241  33.994   2.111  1.00 22.97              
ATOM    899  CA  PHE A 147      56.612  33.497   2.002  1.00 23.15              
ATOM    900  C   PHE A 147      56.646  32.108   1.384  1.00 23.59              
ATOM    901  O   PHE A 147      57.383  31.867   0.425  1.00 23.06              
ATOM    902  CB  PHE A 147      57.305  33.517   3.370  1.00 23.42              
ATOM    903  CG  PHE A 147      57.805  34.864   3.777  1.00 23.63              
ATOM    904  CD1 PHE A 147      57.459  36.027   3.061  1.00 25.86              
ATOM    905  CD2 PHE A 147      58.615  34.996   4.888  1.00 25.34              
ATOM    906  CE1 PHE A 147      57.933  37.253   3.452  1.00 25.70              
ATOM    907  CE2 PHE A 147      59.097  36.231   5.260  1.00 23.94              
ATOM    908  CZ  PHE A 147      58.757  37.356   4.546  1.00 24.69              
ATOM    909  N   PHE A 148      55.796  31.210   1.887  1.00 23.62              
ATOM    910  CA  PHE A 148      55.750  29.839   1.390  1.00 22.85              
ATOM    911  C   PHE A 148      55.375  29.822  -0.091  1.00 23.30              
ATOM    912  O   PHE A 148      55.984  29.112  -0.898  1.00 22.65              
ATOM    913  CB  PHE A 148      54.745  29.014   2.196  1.00 23.29              
ATOM    914  CG  PHE A 148      54.910  27.554   2.040  1.00 22.30              
ATOM    915  CD1 PHE A 148      56.134  26.959   2.310  1.00 24.83              
ATOM    916  CD2 PHE A 148      53.859  26.761   1.643  1.00 25.62              
ATOM    917  CE1 PHE A 148      56.306  25.624   2.165  1.00 24.42              
ATOM    918  CE2 PHE A 148      54.028  25.395   1.503  1.00 23.66              
ATOM    919  CZ  PHE A 148      55.265  24.834   1.766  1.00 25.09              
ATOM    920  N   TRP A 149      54.388  30.631  -0.439  1.00 22.81              
ATOM    921  CA  TRP A 149      53.929  30.726  -1.799  1.00 22.77              
ATOM    922  C   TRP A 149      55.064  31.131  -2.720  1.00 22.34              
ATOM    923  O   TRP A 149      55.209  30.546  -3.788  1.00 21.52              
ATOM    924  CB  TRP A 149      52.759  31.704  -1.929  1.00 22.75              
ATOM    925  CG  TRP A 149      52.265  31.825  -3.347  1.00 22.48              
ATOM    926  CD1 TRP A 149      52.743  32.663  -4.303  1.00 25.30              
ATOM    927  CD2 TRP A 149      51.242  31.053  -3.974  1.00 22.86              
ATOM    928  NE1 TRP A 149      52.071  32.472  -5.489  1.00 26.01              
ATOM    929  CE2 TRP A 149      51.139  31.492  -5.316  1.00 24.91              
ATOM    930  CE3 TRP A 149      50.382  30.043  -3.540  1.00 23.04              
ATOM    931  CZ2 TRP A 149      50.207  30.961  -6.221  1.00 26.49              
ATOM    932  CZ3 TRP A 149      49.452  29.525  -4.433  1.00 24.59              
ATOM    933  CH2 TRP A 149      49.380  29.976  -5.761  1.00 26.84              
ATOM    934  N   GLN A 150      55.871  32.118  -2.321  1.00 21.29              
ATOM    935  CA  GLN A 150      56.968  32.569  -3.160  1.00 21.44              
ATOM    936  C   GLN A 150      58.056  31.511  -3.294  1.00 21.61              
ATOM    937  O   GLN A 150      58.696  31.409  -4.319  1.00 21.19              
ATOM    938  CB  GLN A 150      57.551  33.893  -2.646  1.00 22.24              
ATOM    939  CG  GLN A 150      56.599  35.100  -2.755  1.00 21.17              
ATOM    940  CD  GLN A 150      57.285  36.419  -2.420  1.00 24.32              
ATOM    941  OE1 GLN A 150      58.441  36.602  -2.761  1.00 24.09              
ATOM    942  NE2 GLN A 150      56.566  37.336  -1.772  1.00 26.07              
ATOM    943  N   VAL A 151      58.284  30.742  -2.241  1.00 22.82              
ATOM    944  CA  VAL A 151      59.269  29.656  -2.283  1.00 23.34              
ATOM    945  C   VAL A 151      58.780  28.607  -3.271  1.00 23.90              
ATOM    946  O   VAL A 151      59.558  28.126  -4.094  1.00 23.36              
ATOM    947  CB  VAL A 151      59.523  29.041  -0.887  1.00 23.01              
ATOM    948  CG1 VAL A 151      60.401  27.775  -0.978  1.00 22.77              
ATOM    949  CG2 VAL A 151      60.185  30.082   0.000  1.00 21.81              
ATOM    950  N   LEU A 152      57.479  28.312  -3.246  1.00 24.26              
ATOM    951  CA  LEU A 152      56.927  27.316  -4.144  1.00 24.33              
ATOM    952  C   LEU A 152      57.160  27.764  -5.586  1.00 24.05              
ATOM    953  O   LEU A 152      57.608  26.964  -6.404  1.00 24.05              
ATOM    954  CB  LEU A 152      55.424  27.069  -3.868  1.00 25.50              
ATOM    955  CG  LEU A 152      55.053  25.942  -2.890  1.00 27.10              
ATOM    956  CD1 LEU A 152      55.126  24.595  -3.594  1.00 29.82              
ATOM    957  CD2 LEU A 152      55.973  25.912  -1.741  1.00 30.51              
ATOM    958  N   GLU A 153      56.890  29.032  -5.892  1.00 23.47              
ATOM    959  CA  GLU A 153      57.119  29.551  -7.256  1.00 23.66              
ATOM    960  C   GLU A 153      58.567  29.448  -7.659  1.00 23.69              
ATOM    961  O   GLU A 153      58.879  29.137  -8.809  1.00 24.16              
ATOM    962  CB  GLU A 153      56.649  30.985  -7.383  1.00 22.98              
ATOM    963  CG  GLU A 153      55.138  31.085  -7.234  1.00 24.02              
ATOM    964  CD  GLU A 153      54.423  30.678  -8.498  1.00 26.31              
ATOM    965  OE1 GLU A 153      54.848  31.122  -9.586  1.00 31.65              
ATOM    966  OE2 GLU A 153      53.426  29.949  -8.402  1.00 28.81              
ATOM    967  N   ALA A 154      59.438  29.709  -6.693  1.00 24.32              
ATOM    968  CA  ALA A 154      60.871  29.647  -6.893  1.00 24.61              
ATOM    969  C   ALA A 154      61.326  28.202  -7.157  1.00 24.90              
ATOM    970  O   ALA A 154      62.089  27.956  -8.069  1.00 24.48              
ATOM    971  CB  ALA A 154      61.579  30.233  -5.709  1.00 24.43              
ATOM    972  N   VAL A 155      60.823  27.248  -6.381  1.00 25.83              
ATOM    973  CA  VAL A 155      61.252  25.867  -6.517  1.00 26.04              
ATOM    974  C   VAL A 155      60.761  25.323  -7.859  1.00 26.36              
ATOM    975  O   VAL A 155      61.451  24.560  -8.518  1.00 25.80              
ATOM    976  CB  VAL A 155      60.755  25.031  -5.336  1.00 26.25              
ATOM    977  CG1 VAL A 155      61.076  23.554  -5.513  1.00 27.51              
ATOM    978  CG2 VAL A 155      61.433  25.517  -4.038  1.00 28.04              
ATOM    979  N   ARG A 156      59.572  25.775  -8.256  1.00 26.26              
ATOM    980  CA  ARG A 156      58.936  25.372  -9.480  1.00 26.75              
ATOM    981  C   ARG A 156      59.704  25.880 -10.669  1.00 26.70              
ATOM    982  O   ARG A 156      59.794  25.204 -11.678  1.00 26.28              
ATOM    983  CB  ARG A 156      57.506  25.931  -9.532  1.00 27.20              
ATOM    984  CG  ARG A 156      56.484  25.155  -8.730  1.00 26.21              
ATOM    985  CD  ARG A 156      55.047  25.629  -8.951  1.00 25.38              
ATOM    986  NE  ARG A 156      54.684  25.623 -10.373  1.00 25.13              
ATOM    987  CZ  ARG A 156      53.752  26.399 -10.917  1.00 24.90              
ATOM    988  NH1 ARG A 156      53.064  27.253 -10.154  1.00 24.52              
ATOM    989  NH2 ARG A 156      53.507  26.320 -12.228  1.00 24.27              
ATOM    990  N   HIS A 157      60.220  27.097 -10.580  1.00 26.84              
ATOM    991  CA  HIS A 157      61.021  27.630 -11.674  1.00 26.48              
ATOM    992  C   HIS A 157      62.287  26.801 -11.777  1.00 26.17              
ATOM    993  O   HIS A 157      62.738  26.487 -12.876  1.00 25.30              
ATOM    994  CB  HIS A 157      61.347  29.112 -11.442  1.00 27.40              
ATOM    995  CG  HIS A 157      62.479  29.633 -12.268  1.00 27.60              
ATOM    996  ND1 HIS A 157      62.307  30.603 -13.226  1.00 29.32              
ATOM    997  CD2 HIS A 157      63.802  29.341 -12.263  1.00 28.34              
ATOM    998  CE1 HIS A 157      63.472  30.891 -13.771  1.00 27.48              
ATOM    999  NE2 HIS A 157      64.395  30.136 -13.211  1.00 24.08              
ATOM   1000  N   CYS A 158      62.858  26.431 -10.637  1.00 25.85              
ATOM   1001  CA  CYS A 158      64.065  25.598 -10.654  1.00 26.81              
ATOM   1002  C   CYS A 158      63.776  24.296 -11.424  1.00 27.44              
ATOM   1003  O   CYS A 158      64.421  24.018 -12.426  1.00 27.03              
ATOM   1004  CB  CYS A 158      64.568  25.315  -9.232  1.00 26.87              
ATOM   1005  SG  CYS A 158      65.404  26.719  -8.453  1.00 26.96              
ATOM   1006  N   HIS A 159      62.762  23.543 -10.976  1.00 27.90              
ATOM   1007  CA  HIS A 159      62.368  22.277 -11.623  1.00 27.84              
ATOM   1008  C   HIS A 159      61.999  22.419 -13.103  1.00 27.54              
ATOM   1009  O   HIS A 159      62.293  21.529 -13.911  1.00 26.83              
ATOM   1010  CB  HIS A 159      61.214  21.630 -10.857  1.00 28.27              
ATOM   1011  CG  HIS A 159      61.586  21.202  -9.474  1.00 29.53              
ATOM   1012  ND1 HIS A 159      60.714  20.558  -8.635  1.00 33.72              
ATOM   1013  CD2 HIS A 159      62.749  21.303  -8.795  1.00 32.41              
ATOM   1014  CE1 HIS A 159      61.314  20.308  -7.484  1.00 35.31              
ATOM   1015  NE2 HIS A 159      62.553  20.745  -7.559  1.00 32.35              
ATOM   1016  N   ASN A 160      61.371  23.534 -13.452  0.50 27.53              
ATOM   1017  CA  ASN A 160      61.001  23.818 -14.846  0.50 27.50              
ATOM   1018  C   ASN A 160      62.243  24.075 -15.710  0.50 27.26              
ATOM   1019  O   ASN A 160      62.211  23.907 -16.927  0.50 27.71              
ATOM   1020  CB  ASN A 160      60.061  25.027 -14.892  0.50 27.63              
ATOM   1021  CG  ASN A 160      59.239  25.093 -16.157  0.50 26.55              
ATOM   1022  OD1 ASN A 160      58.650  24.103 -16.592  0.50 27.33              
ATOM   1023  ND2 ASN A 160      59.157  26.276 -16.731  0.50 25.25              
ATOM   1024  N   CYS A 161      63.324  24.502 -15.064  1.00 27.17              
ATOM   1025  CA  CYS A 161      64.612  24.735 -15.689  1.00 27.10              
ATOM   1026  C   CYS A 161      65.477  23.496 -15.589  1.00 26.90              
ATOM   1027  O   CYS A 161      66.652  23.527 -15.950  1.00 26.55              
ATOM   1028  CB  CYS A 161      65.327  25.897 -14.989  1.00 27.09              
ATOM   1029  SG  CYS A 161      64.576  27.503 -15.309  1.00 29.99              
ATOM   1030  N   GLY A 162      64.902  22.426 -15.040  1.00 27.38              
ATOM   1031  CA  GLY A 162      65.572  21.149 -14.887  1.00 27.68              
ATOM   1032  C   GLY A 162      66.634  21.105 -13.808  1.00 27.07              
ATOM   1033  O   GLY A 162      67.606  20.379 -13.960  1.00 26.46              
ATOM   1034  N   VAL A 163      66.422  21.855 -12.724  1.00 27.27              
ATOM   1035  CA  VAL A 163      67.346  21.953 -11.600  1.00 26.86              
ATOM   1036  C   VAL A 163      66.652  21.575 -10.304  1.00 26.94              
ATOM   1037  O   VAL A 163      65.575  22.064 -10.013  1.00 27.66              
ATOM   1038  CB  VAL A 163      67.860  23.409 -11.419  1.00 26.98              
ATOM   1039  CG1 VAL A 163      68.680  23.580 -10.084  1.00 26.90              
ATOM   1040  CG2 VAL A 163      68.669  23.843 -12.633  1.00 25.75              
ATOM   1041  N   LEU A 164      67.285  20.707  -9.537  1.00 26.70              
ATOM   1042  CA  LEU A 164      66.809  20.303  -8.212  1.00 26.93              
ATOM   1043  C   LEU A 164      67.750  20.975  -7.197  1.00 26.82              
ATOM   1044  O   LEU A 164      68.969  20.794  -7.261  1.00 27.22              
ATOM   1045  CB  LEU A 164      66.859  18.781  -8.072  1.00 26.51              
ATOM   1046  CG  LEU A 164      66.243  18.263  -6.757  1.00 27.31              
ATOM   1047  CD1 LEU A 164      64.758  18.485  -6.789  1.00 26.42              
ATOM   1048  CD2 LEU A 164      66.573  16.819  -6.524  1.00 25.10              
ATOM   1049  N   HIS A 165      67.201  21.755  -6.274  1.00 25.84              
ATOM   1050  CA  HIS A 165      68.007  22.480  -5.299  1.00 25.27              
ATOM   1051  C   HIS A 165      68.653  21.621  -4.197  1.00 25.86              
ATOM   1052  O   HIS A 165      69.828  21.842  -3.820  1.00 25.25              
ATOM   1053  CB  HIS A 165      67.152  23.576  -4.694  1.00 24.39              
ATOM   1054  CG  HIS A 165      67.898  24.519  -3.815  1.00 23.43              
ATOM   1055  ND1 HIS A 165      68.190  24.234  -2.502  1.00 24.61              
ATOM   1056  CD2 HIS A 165      68.365  25.768  -4.042  1.00 23.52              
ATOM   1057  CE1 HIS A 165      68.841  25.249  -1.967  1.00 23.55              
ATOM   1058  NE2 HIS A 165      68.953  26.199  -2.878  1.00 24.41              
ATOM   1059  N   ARG A 166      67.869  20.686  -3.655  1.00 25.98              
ATOM   1060  CA  ARG A 166      68.293  19.749  -2.619  1.00 26.72              
ATOM   1061  C   ARG A 166      68.715  20.343  -1.278  1.00 27.10              
ATOM   1062  O   ARG A 166      69.219  19.629  -0.429  1.00 27.70              
ATOM   1063  CB  ARG A 166      69.432  18.862  -3.121  1.00 27.56              
ATOM   1064  CG  ARG A 166      69.153  18.177  -4.446  1.00 27.52              
ATOM   1065  CD  ARG A 166      70.419  17.686  -5.113  1.00 31.33              
ATOM   1066  NE  ARG A 166      70.626  16.291  -4.877  1.00 34.13              
ATOM   1067  CZ  ARG A 166      71.753  15.633  -5.096  1.00 35.53              
ATOM   1068  NH1 ARG A 166      72.855  16.238  -5.535  1.00 35.53              
ATOM   1069  NH2 ARG A 166      71.761  14.341  -4.849  1.00 35.07              
ATOM   1070  N   ASP A 167      68.489  21.625  -1.058  1.00 26.89              
ATOM   1071  CA  ASP A 167      68.842  22.221   0.239  1.00 26.78              
ATOM   1072  C   ASP A 167      67.907  23.372   0.598  1.00 26.40              
ATOM   1073  O   ASP A 167      68.325  24.392   1.138  1.00 27.15              
ATOM   1074  CB  ASP A 167      70.313  22.672   0.224  1.00 26.87              
ATOM   1075  CG  ASP A 167      70.907  22.827   1.625  1.00 28.49              
ATOM   1076  OD1 ASP A 167      70.323  22.299   2.595  1.00 29.19              
ATOM   1077  OD2 ASP A 167      71.959  23.477   1.840  1.00 29.05              
ATOM   1078  N   ILE A 168      66.614  23.188   0.333  1.00 26.80              
ATOM   1079  CA  ILE A 168      65.612  24.198   0.664  1.00 26.54              
ATOM   1080  C   ILE A 168      65.541  24.275   2.187  1.00 26.07              
ATOM   1081  O   ILE A 168      65.317  23.277   2.850  1.00 27.22              
ATOM   1082  CB  ILE A 168      64.218  23.848   0.094  1.00 27.00              
ATOM   1083  CG1 ILE A 168      64.229  23.701  -1.427  1.00 26.98              
ATOM   1084  CG2 ILE A 168      63.192  24.908   0.484  1.00 28.26              
ATOM   1085  CD1 ILE A 168      63.194  22.717  -1.922  1.00 26.90              
ATOM   1086  N   LYS A 169      65.748  25.462   2.724  1.00 25.28              
ATOM   1087  CA  LYS A 169      65.689  25.711   4.162  1.00 25.50              
ATOM   1088  C   LYS A 169      65.690  27.217   4.381  1.00 26.52              
ATOM   1089  O   LYS A 169      65.965  27.992   3.456  1.00 26.41              
ATOM   1090  CB  LYS A 169      66.835  25.042   4.916  1.00 25.35              
ATOM   1091  CG  LYS A 169      68.250  25.511   4.561  1.00 26.61              
ATOM   1092  CD  LYS A 169      69.278  24.841   5.504  1.00 27.12              
ATOM   1093  CE  LYS A 169      70.734  24.997   5.043  1.00 26.51              
ATOM   1094  NZ  LYS A 169      71.731  24.357   5.973  1.00 25.12              
ATOM   1095  N   ASP A 170      65.390  27.637   5.596  1.00 25.98              
ATOM   1096  CA  ASP A 170      65.353  29.059   5.893  1.00 26.44              
ATOM   1097  C   ASP A 170      66.695  29.811   5.647  1.00 27.16              
ATOM   1098  O   ASP A 170      66.680  30.911   5.095  1.00 25.80              
ATOM   1099  CB  ASP A 170      64.759  29.332   7.277  1.00 26.18              
ATOM   1100  CG  ASP A 170      65.526  28.708   8.424  1.00 27.09              
ATOM   1101  OD1 ASP A 170      66.549  27.982   8.272  1.00 26.91              
ATOM   1102  OD2 ASP A 170      65.142  28.936   9.580  1.00 27.28              
ATOM   1103  N   GLU A 171      67.832  29.180   5.948  1.00 27.91              
ATOM   1104  CA  GLU A 171      69.146  29.820   5.743  1.00 28.48              
ATOM   1105  C   GLU A 171      69.461  30.090   4.280  1.00 27.50              
ATOM   1106  O   GLU A 171      70.346  30.897   3.978  1.00 27.22              
ATOM   1107  CB  GLU A 171      70.303  28.988   6.304  1.00 29.21              
ATOM   1108  CG  GLU A 171      70.133  28.414   7.701  1.00 33.13              
ATOM   1109  CD  GLU A 171      71.249  27.446   8.050  1.00 35.77              
ATOM   1110  OE1 GLU A 171      71.012  26.217   8.068  1.00 38.53              
ATOM   1111  OE2 GLU A 171      72.365  27.924   8.302  1.00 38.19              
ATOM   1112  N   ASN A 172      68.763  29.400   3.389  1.00 26.65              
ATOM   1113  CA  ASN A 172      68.946  29.526   1.946  1.00 26.16              
ATOM   1114  C   ASN A 172      67.845  30.310   1.217  1.00 26.47              
ATOM   1115  O   ASN A 172      67.652  30.182   0.014  1.00 26.67              
ATOM   1116  CB  ASN A 172      69.139  28.128   1.341  1.00 26.36              
ATOM   1117  CG  ASN A 172      70.484  27.532   1.695  1.00 25.24              
ATOM   1118  OD1 ASN A 172      71.427  28.274   1.911  1.00 25.68              
ATOM   1119  ND2 ASN A 172      70.582  26.197   1.760  1.00 25.29              
ATOM   1120  N   ILE A 173      67.126  31.133   1.964  1.00 26.99              
ATOM   1121  CA  ILE A 173      66.134  32.043   1.401  1.00 26.77              
ATOM   1122  C   ILE A 173      66.459  33.458   1.882  1.00 26.51              
ATOM   1123  O   ILE A 173      66.641  33.685   3.099  1.00 25.19              
ATOM   1124  CB  ILE A 173      64.728  31.672   1.838  1.00 27.19              
ATOM   1125  CG1 ILE A 173      64.408  30.229   1.411  1.00 28.93              
ATOM   1126  CG2 ILE A 173      63.712  32.599   1.195  1.00 28.31              
ATOM   1127  CD1 ILE A 173      63.385  29.604   2.189  1.00 29.33              
ATOM   1128  N   LEU A 174      66.511  34.394   0.935  1.00 25.84              
ATOM   1129  CA  LEU A 174      66.730  35.813   1.228  1.00 25.95              
ATOM   1130  C   LEU A 174      65.436  36.591   1.081  1.00 25.84              
ATOM   1131  O   LEU A 174      64.669  36.340   0.159  1.00 25.05              
ATOM   1132  CB  LEU A 174      67.723  36.434   0.263  1.00 26.33              
ATOM   1133  CG  LEU A 174      69.164  35.980   0.263  1.00 26.12              
ATOM   1134  CD1 LEU A 174      69.982  36.959  -0.560  1.00 27.59              
ATOM   1135  CD2 LEU A 174      69.696  35.835   1.689  1.00 27.39              
ATOM   1136  N   ILE A 175      65.230  37.561   1.975  1.00 26.35              
ATOM   1137  CA  ILE A 175      64.060  38.432   1.919  1.00 26.66              
ATOM   1138  C   ILE A 175      64.526  39.798   1.462  1.00 27.50              
ATOM   1139  O   ILE A 175      65.340  40.416   2.116  1.00 26.14              
ATOM   1140  CB  ILE A 175      63.357  38.562   3.284  1.00 26.53              
ATOM   1141  CG1 ILE A 175      62.995  37.203   3.883  1.00 26.58              
ATOM   1142  CG2 ILE A 175      62.087  39.436   3.155  1.00 27.05              
ATOM   1143  CD1 ILE A 175      62.668  37.255   5.435  1.00 26.39              
ATOM   1144  N   ASP A 176      64.043  40.226   0.293  1.00 28.50              
ATOM   1145  CA  ASP A 176      64.266  41.570  -0.211  1.00 29.16              
ATOM   1146  C   ASP A 176      63.222  42.332   0.597  1.00 29.96              
ATOM   1147  O   ASP A 176      62.042  42.324   0.263  1.00 30.72              
ATOM   1148  CB  ASP A 176      64.001  41.622  -1.728  1.00 28.95              
ATOM   1149  CG  ASP A 176      64.001  43.027  -2.296  1.00 29.16              
ATOM   1150  OD1 ASP A 176      63.775  43.993  -1.552  1.00 29.00              
ATOM   1151  OD2 ASP A 176      64.206  43.251  -3.500  1.00 27.12              
ATOM   1152  N   LEU A 177      63.665  42.964   1.677  1.00 30.60              
ATOM   1153  CA  LEU A 177      62.771  43.642   2.613  1.00 30.98              
ATOM   1154  C   LEU A 177      61.941  44.776   2.009  1.00 31.62              
ATOM   1155  O   LEU A 177      60.804  44.984   2.427  1.00 32.15              
ATOM   1156  CB  LEU A 177      63.567  44.163   3.817  1.00 31.00              
ATOM   1157  CG  LEU A 177      64.248  43.098   4.703  1.00 30.53              
ATOM   1158  CD1 LEU A 177      65.321  43.712   5.613  1.00 30.06              
ATOM   1159  CD2 LEU A 177      63.224  42.341   5.526  1.00 30.05              
ATOM   1160  N   ASN A 178      62.498  45.510   1.048  1.00 31.54              
ATOM   1161  CA  ASN A 178      61.766  46.623   0.450  1.00 31.81              
ATOM   1162  C   ASN A 178      60.615  46.131  -0.425  1.00 31.66              
ATOM   1163  O   ASN A 178      59.489  46.616  -0.295  1.00 31.48              
ATOM   1164  CB  ASN A 178      62.677  47.539  -0.380  1.00 31.83              
ATOM   1165  CG  ASN A 178      63.541  48.470   0.481  1.00 33.36              
ATOM   1166  OD1 ASN A 178      63.327  48.615   1.700  1.00 33.86              
ATOM   1167  ND2 ASN A 178      64.521  49.111  -0.156  1.00 31.86              
ATOM   1168  N   ARG A 179      60.904  45.164  -1.297  1.00 31.11              
ATOM   1169  CA  ARG A 179      59.906  44.641  -2.250  1.00 31.00              
ATOM   1170  C   ARG A 179      59.057  43.456  -1.744  1.00 30.28              
ATOM   1171  O   ARG A 179      58.087  43.054  -2.406  1.00 30.19              
ATOM   1172  CB  ARG A 179      60.597  44.258  -3.560  1.00 30.97              
ATOM   1173  CG  ARG A 179      61.210  45.442  -4.300  1.00 31.51              
ATOM   1174  CD  ARG A 179      61.775  45.083  -5.663  1.00 32.54              
ATOM   1175  NE  ARG A 179      62.439  46.211  -6.336  1.00 33.55              
ATOM   1176  CZ  ARG A 179      61.820  47.225  -6.942  1.00 34.17              
ATOM   1177  NH1 ARG A 179      60.494  47.300  -6.981  1.00 34.52              
ATOM   1178  NH2 ARG A 179      62.538  48.185  -7.521  1.00 35.34              
ATOM   1179  N   GLY A 180      59.391  42.921  -0.573  1.00 29.54              
ATOM   1180  CA  GLY A 180      58.678  41.771  -0.028  1.00 29.59              
ATOM   1181  C   GLY A 180      58.846  40.502  -0.874  1.00 29.03              
ATOM   1182  O   GLY A 180      58.001  39.611  -0.828  1.00 28.84              
ATOM   1183  N   GLU A 181      59.944  40.428  -1.626  1.00 28.17              
ATOM   1184  CA  GLU A 181      60.207  39.315  -2.532  1.00 28.39              
ATOM   1185  C   GLU A 181      61.277  38.395  -1.982  1.00 28.13              
ATOM   1186  O   GLU A 181      62.319  38.868  -1.572  1.00 28.60              
ATOM   1187  CB  GLU A 181      60.657  39.840  -3.903  1.00 28.22              
ATOM   1188  CG  GLU A 181      59.527  40.373  -4.768  1.00 28.95              
ATOM   1189  CD  GLU A 181      60.015  41.154  -5.980  1.00 30.78              
ATOM   1190  OE1 GLU A 181      61.220  41.020  -6.318  1.00 30.55              
ATOM   1191  OE2 GLU A 181      59.188  41.898  -6.590  1.00 29.75              
ATOM   1192  N   LEU A 182      61.015  37.087  -2.002  1.00 28.00              
ATOM   1193  CA  LEU A 182      61.970  36.073  -1.561  1.00 27.79              
ATOM   1194  C   LEU A 182      62.797  35.556  -2.733  1.00 27.81              
ATOM   1195  O   LEU A 182      62.348  35.553  -3.879  1.00 27.01              
ATOM   1196  CB  LEU A 182      61.262  34.906  -0.886  1.00 27.83              
ATOM   1197  CG  LEU A 182      61.126  35.038   0.621  1.00 27.81              
ATOM   1198  CD1 LEU A 182      60.471  36.354   0.987  1.00 29.56              
ATOM   1199  CD2 LEU A 182      60.316  33.872   1.100  1.00 28.76              
ATOM   1200  N   LYS A 183      64.005  35.111  -2.403  1.00 28.16              
ATOM   1201  CA  LYS A 183      64.990  34.620  -3.344  1.00 28.92              
ATOM   1202  C   LYS A 183      65.650  33.377  -2.768  1.00 28.48              
ATOM   1203  O   LYS A 183      66.139  33.398  -1.639  1.00 27.64              
ATOM   1204  CB  LYS A 183      66.081  35.681  -3.564  1.00 29.51              
ATOM   1205  CG  LYS A 183      65.846  36.521  -4.785  1.00 32.55              
ATOM   1206  CD  LYS A 183      66.819  37.694  -4.899  1.00 35.56              
ATOM   1207  CE  LYS A 183      66.745  38.321  -6.291  1.00 36.88              
ATOM   1208  NZ  LYS A 183      65.441  38.968  -6.618  1.00 37.19              
ATOM   1209  N   LEU A 184      65.678  32.311  -3.556  1.00 28.80              
ATOM   1210  CA  LEU A 184      66.301  31.062  -3.154  1.00 29.23              
ATOM   1211  C   LEU A 184      67.782  31.153  -3.492  1.00 28.55              
ATOM   1212  O   LEU A 184      68.122  31.456  -4.623  1.00 28.03              
ATOM   1213  CB  LEU A 184      65.660  29.920  -3.925  1.00 29.86              
ATOM   1214  CG  LEU A 184      65.932  28.474  -3.561  1.00 30.61              
ATOM   1215  CD1 LEU A 184      65.597  28.181  -2.154  1.00 33.75              
ATOM   1216  CD2 LEU A 184      65.096  27.621  -4.476  1.00 32.88              
ATOM   1217  N   ILE A 185      68.650  30.900  -2.510  1.00 28.36              
ATOM   1218  CA  ILE A 185      70.098  30.917  -2.722  1.00 28.54              
ATOM   1219  C   ILE A 185      70.789  29.565  -2.444  1.00 28.56              
ATOM   1220  O   ILE A 185      70.191  28.619  -1.934  1.00 28.07              
ATOM   1221  CB  ILE A 185      70.760  31.982  -1.816  1.00 28.65              
ATOM   1222  CG1 ILE A 185      70.648  31.594  -0.342  1.00 28.69              
ATOM   1223  CG2 ILE A 185      70.160  33.344  -2.065  1.00 29.93              
ATOM   1224  CD1 ILE A 185      71.576  32.381   0.587  1.00 30.26              
ATOM   1225  N   ASP A 186      72.073  29.533  -2.785  1.00 28.19              
ATOM   1226  CA  ASP A 186      72.982  28.420  -2.539  1.00 28.35              
ATOM   1227  C   ASP A 186      72.631  27.114  -3.239  1.00 27.59              
ATOM   1228  O   ASP A 186      72.096  26.217  -2.659  1.00 27.59              
ATOM   1229  CB  ASP A 186      73.136  28.214  -1.033  1.00 29.02              
ATOM   1230  CG  ASP A 186      74.356  27.379  -0.663  1.00 30.11              
ATOM   1231  OD1 ASP A 186      75.075  26.860  -1.552  1.00 31.44              
ATOM   1232  OD2 ASP A 186      74.655  27.197   0.524  1.00 31.33              
ATOM   1233  N   PHE A 187      73.038  26.991  -4.484  1.00 28.31              
ATOM   1234  CA  PHE A 187      72.790  25.802  -5.272  1.00 28.73              
ATOM   1235  C   PHE A 187      73.957  24.810  -5.207  1.00 29.62              
ATOM   1236  O   PHE A 187      74.108  23.953  -6.095  1.00 30.10              
ATOM   1237  CB  PHE A 187      72.515  26.253  -6.710  1.00 28.98              
ATOM   1238  CG  PHE A 187      71.152  26.799  -6.880  1.00 28.85              
ATOM   1239  CD1 PHE A 187      70.868  28.108  -6.510  1.00 28.36              
ATOM   1240  CD2 PHE A 187      70.130  25.989  -7.363  1.00 27.58              
ATOM   1241  CE1 PHE A 187      69.591  28.614  -6.646  1.00 29.99              
ATOM   1242  CE2 PHE A 187      68.852  26.489  -7.500  1.00 28.95              
ATOM   1243  CZ  PHE A 187      68.579  27.801  -7.130  1.00 29.85              
ATOM   1244  N   GLY A 188      74.740  24.892  -4.128  1.00 29.66              
ATOM   1245  CA  GLY A 188      75.931  24.073  -3.952  1.00 30.12              
ATOM   1246  C   GLY A 188      75.722  22.632  -3.537  1.00 30.31              
ATOM   1247  O   GLY A 188      76.692  21.894  -3.365  1.00 30.40              
ATOM   1248  N   SER A 189      74.469  22.247  -3.312  1.00 30.61              
ATOM   1249  CA  SER A 189      74.118  20.859  -3.020  1.00 30.58              
ATOM   1250  C   SER A 189      73.153  20.326  -4.078  1.00 30.02              
ATOM   1251  O   SER A 189      72.702  19.200  -3.982  1.00 30.26              
ATOM   1252  CB  SER A 189      73.442  20.734  -1.659  1.00 31.06              
ATOM   1253  OG  SER A 189      74.138  21.458  -0.675  1.00 32.51              
ATOM   1254  N   GLY A 190      72.857  21.119  -5.096  1.00 29.41              
ATOM   1255  CA  GLY A 190      71.875  20.743  -6.092  1.00 28.85              
ATOM   1256  C   GLY A 190      72.357  19.714  -7.098  1.00 28.07              
ATOM   1257  O   GLY A 190      73.429  19.136  -6.973  1.00 27.64              
ATOM   1258  N   ALA A 191      71.525  19.481  -8.096  1.00 27.41              
ATOM   1259  CA  ALA A 191      71.832  18.523  -9.146  1.00 27.37              
ATOM   1260  C   ALA A 191      70.859  18.731 -10.251  1.00 26.96              
ATOM   1261  O   ALA A 191      69.843  19.387 -10.046  1.00 26.37              
ATOM   1262  CB  ALA A 191      71.696  17.109  -8.627  1.00 27.35              
ATOM   1263  N   LEU A 192      71.186  18.210 -11.435  1.00 26.82              
ATOM   1264  CA  LEU A 192      70.241  18.226 -12.537  1.00 26.53              
ATOM   1265  C   LEU A 192      69.025  17.427 -12.061  1.00 26.28              
ATOM   1266  O   LEU A 192      69.165  16.380 -11.419  1.00 26.51              
ATOM   1267  CB  LEU A 192      70.843  17.586 -13.800  1.00 26.76              
ATOM   1268  CG  LEU A 192      72.099  18.242 -14.381  1.00 27.38              
ATOM   1269  CD1 LEU A 192      72.483  17.682 -15.726  1.00 29.96              
ATOM   1270  CD2 LEU A 192      71.879  19.748 -14.493  1.00 28.72              
ATOM   1271  N   LEU A 193      67.844  17.977 -12.272  1.00 26.01              
ATOM   1272  CA  LEU A 193      66.591  17.275 -12.004  1.00 25.64              
ATOM   1273  C   LEU A 193      66.508  16.006 -12.865  1.00 25.21              
ATOM   1274  O   LEU A 193      66.848  16.012 -14.048  1.00 24.83              
ATOM   1275  CB  LEU A 193      65.393  18.166 -12.352  1.00 25.92              
ATOM   1276  CG  LEU A 193      64.025  17.602 -11.925  1.00 26.64              
ATOM   1277  CD1 LEU A 193      64.068  17.200 -10.433  1.00 27.37              
ATOM   1278  CD2 LEU A 193      62.876  18.591 -12.159  1.00 27.06              
ATOM   1279  N   LYS A 194      66.030  14.924 -12.268  1.00 25.19              
ATOM   1280  CA  LYS A 194      65.880  13.655 -12.959  1.00 24.95              
ATOM   1281  C   LYS A 194      64.711  12.895 -12.384  1.00 24.51              
ATOM   1282  O   LYS A 194      64.313  13.117 -11.252  1.00 25.33              
ATOM   1283  CB  LYS A 194      67.173  12.839 -12.885  1.00 25.29              
ATOM   1284  CG  LYS A 194      67.419  12.105 -11.584  1.00 24.64              
ATOM   1285  CD  LYS A 194      68.838  11.511 -11.549  1.00 25.30              
ATOM   1286  CE  LYS A 194      69.078  10.784 -10.234  1.00 25.73              
ATOM   1287  NZ  LYS A 194      70.312   9.952 -10.211  1.00 28.75              
ATOM   1288  N   ASP A 195      64.173  11.990 -13.192  1.00 24.99              
ATOM   1289  CA  ASP A 195      63.013  11.178 -12.831  1.00 24.90              
ATOM   1290  C   ASP A 195      63.403   9.867 -12.145  1.00 24.43              
ATOM   1291  O   ASP A 195      62.550   9.134 -11.677  1.00 24.02              
ATOM   1292  CB  ASP A 195      62.173  10.907 -14.098  1.00 24.78              
ATOM   1293  CG  ASP A 195      61.573  12.196 -14.687  1.00 25.26              
ATOM   1294  OD1 ASP A 195      60.946  12.956 -13.931  1.00 24.01              
ATOM   1295  OD2 ASP A 195      61.687  12.537 -15.881  1.00 24.60              
ATOM   1296  N   THR A 196      64.699   9.586 -12.117  1.00 24.85              
ATOM   1297  CA  THR A 196      65.243   8.375 -11.514  1.00 24.63              
ATOM   1298  C   THR A 196      65.626   8.632 -10.057  1.00 24.87              
ATOM   1299  O   THR A 196      65.502   9.760  -9.559  1.00 24.14              
ATOM   1300  CB  THR A 196      66.416   7.850 -12.344  1.00 24.67              
ATOM   1301  OG1 THR A 196      67.193   8.941 -12.868  1.00 25.72              
ATOM   1302  CG2 THR A 196      65.881   7.135 -13.602  1.00 24.34              
ATOM   1303  N   VAL A 197      66.099   7.597  -9.378  1.00 24.40              
ATOM   1304  CA  VAL A 197      66.379   7.698  -7.952  1.00 24.45              
ATOM   1305  C   VAL A 197      67.749   8.324  -7.701  1.00 24.68              
ATOM   1306  O   VAL A 197      68.684   8.119  -8.464  1.00 24.24              
ATOM   1307  CB  VAL A 197      66.245   6.310  -7.266  1.00 24.14              
ATOM   1308  CG1 VAL A 197      67.381   5.361  -7.675  1.00 24.07              
ATOM   1309  CG2 VAL A 197      66.143   6.434  -5.755  1.00 23.40              
ATOM   1310  N   TYR A 198      67.822   9.151  -6.669  1.00 25.77              
ATOM   1311  CA  TYR A 198      69.075   9.744  -6.223  1.00 26.20              
ATOM   1312  C   TYR A 198      69.614   8.877  -5.060  1.00 27.63              
ATOM   1313  O   TYR A 198      68.898   8.605  -4.072  1.00 27.90              
ATOM   1314  CB  TYR A 198      68.870  11.175  -5.738  1.00 26.34              
ATOM   1315  CG  TYR A 198      68.504  12.211  -6.807  1.00 25.26              
ATOM   1316  CD1 TYR A 198      67.179  12.377  -7.216  1.00 23.27              
ATOM   1317  CD2 TYR A 198      69.468  13.064  -7.344  1.00 22.55              
ATOM   1318  CE1 TYR A 198      66.834  13.299  -8.166  1.00 22.83              
ATOM   1319  CE2 TYR A 198      69.126  14.010  -8.318  1.00 24.10              
ATOM   1320  CZ  TYR A 198      67.803  14.126  -8.713  1.00 24.00              
ATOM   1321  OH  TYR A 198      67.427  15.037  -9.680  1.00 23.08              
ATOM   1322  N   THR A 199      70.866   8.448  -5.172  1.00 28.56              
ATOM   1323  CA  THR A 199      71.533   7.683  -4.125  1.00 29.76              
ATOM   1324  C   THR A 199      72.590   8.530  -3.399  1.00 30.82              
ATOM   1325  O   THR A 199      73.275   8.023  -2.524  1.00 30.30              
ATOM   1326  CB  THR A 199      72.189   6.425  -4.715  1.00 29.89              
ATOM   1327  OG1 THR A 199      72.942   6.763  -5.890  1.00 29.98              
ATOM   1328  CG2 THR A 199      71.134   5.440  -5.215  1.00 29.92              
ATOM   1329  N   ASP A 200      72.716   9.808  -3.777  1.00 32.02              
ATOM   1330  CA  ASP A 200      73.662  10.751  -3.157  1.00 32.98              
ATOM   1331  C   ASP A 200      72.899  11.943  -2.546  1.00 32.70              
ATOM   1332  O   ASP A 200      71.791  12.232  -2.966  1.00 31.90              
ATOM   1333  CB  ASP A 200      74.720  11.205  -4.194  1.00 33.68              
ATOM   1334  CG  ASP A 200      74.146  12.147  -5.278  1.00 37.37              
ATOM   1335  OD1 ASP A 200      74.552  13.346  -5.302  1.00 40.79              
ATOM   1336  OD2 ASP A 200      73.300  11.787  -6.142  1.00 39.29              
ATOM   1337  N   PHE A 201      73.485  12.597  -1.538  1.00 32.46              
ATOM   1338  CA  PHE A 201      72.883  13.756  -0.885  1.00 32.60              
ATOM   1339  C   PHE A 201      73.858  14.398   0.103  1.00 32.80              
ATOM   1340  O   PHE A 201      74.389  13.734   0.989  1.00 32.90              
ATOM   1341  CB  PHE A 201      71.574  13.373  -0.168  1.00 32.34              
ATOM   1342  CG  PHE A 201      70.957  14.478   0.667  1.00 30.70              
ATOM   1343  CD1 PHE A 201      70.088  15.401   0.087  1.00 28.67              
ATOM   1344  CD2 PHE A 201      71.181  14.546   2.054  1.00 29.61              
ATOM   1345  CE1 PHE A 201      69.493  16.394   0.849  1.00 28.25              
ATOM   1346  CE2 PHE A 201      70.585  15.546   2.834  1.00 27.14              
ATOM   1347  CZ  PHE A 201      69.750  16.470   2.238  1.00 26.57              
ATOM   1348  N   ASP A 202      74.057  15.702  -0.059  1.00 33.00              
ATOM   1349  CA  ASP A 202      74.934  16.490   0.801  1.00 33.53              
ATOM   1350  C   ASP A 202      74.249  17.812   1.124  1.00 32.97              
ATOM   1351  O   ASP A 202      74.869  18.875   1.082  1.00 33.32              
ATOM   1352  CB  ASP A 202      76.301  16.714   0.126  1.00 33.62              
ATOM   1353  CG  ASP A 202      77.278  17.518   1.003  1.00 35.70              
ATOM   1354  OD1 ASP A 202      77.693  17.004   2.062  1.00 36.64              
ATOM   1355  OD2 ASP A 202      77.684  18.680   0.711  1.00 38.02              
ATOM   1356  N   GLY A 203      72.956  17.736   1.430  1.00 32.78              
ATOM   1357  CA  GLY A 203      72.173  18.895   1.847  1.00 32.13              
ATOM   1358  C   GLY A 203      72.054  18.848   3.360  1.00 31.96              
ATOM   1359  O   GLY A 203      72.877  18.244   4.024  1.00 32.46              
ATOM   1360  N   THR A 204      71.024  19.453   3.915  1.00 31.59              
ATOM   1361  CA  THR A 204      70.850  19.462   5.363  1.00 31.55              
ATOM   1362  C   THR A 204      70.038  18.257   5.813  1.00 31.25              
ATOM   1363  O   THR A 204      68.898  18.083   5.378  1.00 30.50              
ATOM   1364  CB  THR A 204      70.133  20.760   5.803  1.00 31.48              
ATOM   1365  OG1 THR A 204      70.798  21.882   5.216  1.00 30.94              
ATOM   1366  CG2 THR A 204      70.252  20.980   7.328  1.00 31.63              
ATOM   1367  N   ARG A 205      70.612  17.483   6.732  1.00 31.06              
ATOM   1368  CA  ARG A 205      69.988  16.267   7.253  1.00 31.76              
ATOM   1369  C   ARG A 205      68.628  16.463   7.967  1.00 31.44              
ATOM   1370  O   ARG A 205      67.739  15.637   7.830  1.00 31.34              
ATOM   1371  CB  ARG A 205      70.956  15.551   8.192  1.00 31.55              
ATOM   1372  CG  ARG A 205      70.433  14.209   8.704  1.00 33.68              
ATOM   1373  CD  ARG A 205      71.498  13.304   9.316  1.00 34.76              
ATOM   1374  NE  ARG A 205      72.041  12.432   8.284  1.00 37.50              
ATOM   1375  CZ  ARG A 205      71.836  11.120   8.173  1.00 37.15              
ATOM   1376  NH1 ARG A 205      71.121  10.444   9.062  1.00 38.56              
ATOM   1377  NH2 ARG A 205      72.388  10.472   7.170  1.00 37.36              
ATOM   1378  N   VAL A 206      68.496  17.527   8.753  1.00 31.31              
ATOM   1379  CA  VAL A 206      67.244  17.812   9.456  1.00 31.01              
ATOM   1380  C   VAL A 206      66.111  18.232   8.516  1.00 30.14              
ATOM   1381  O   VAL A 206      64.974  18.346   8.965  1.00 29.64              
ATOM   1382  CB  VAL A 206      67.404  18.869  10.605  1.00 31.58              
ATOM   1383  CG1 VAL A 206      68.100  18.261  11.803  1.00 31.02              
ATOM   1384  CG2 VAL A 206      68.144  20.136  10.131  1.00 32.28              
ATOM   1385  N   TYR A 207      66.409  18.485   7.232  1.00 30.05              
ATOM   1386  CA  TYR A 207      65.366  18.755   6.228  1.00 29.57              
ATOM   1387  C   TYR A 207      65.248  17.573   5.282  1.00 29.03              
ATOM   1388  O   TYR A 207      64.435  17.594   4.349  1.00 28.51              
ATOM   1389  CB  TYR A 207      65.667  19.997   5.382  1.00 30.27              
ATOM   1390  CG  TYR A 207      65.391  21.313   6.047  1.00 30.38              
ATOM   1391  CD1 TYR A 207      66.223  21.797   7.040  1.00 30.74              
ATOM   1392  CD2 TYR A 207      64.299  22.071   5.679  1.00 29.85              
ATOM   1393  CE1 TYR A 207      65.962  23.020   7.661  1.00 31.43              
ATOM   1394  CE2 TYR A 207      64.041  23.281   6.266  1.00 31.17              
ATOM   1395  CZ  TYR A 207      64.874  23.753   7.268  1.00 30.88              
ATOM   1396  OH  TYR A 207      64.598  24.976   7.832  1.00 32.70              
ATOM   1397  N   SER A 208      66.066  16.546   5.507  1.00 28.54              
ATOM   1398  CA  SER A 208      66.107  15.391   4.613  1.00 27.40              
ATOM   1399  C   SER A 208      65.001  14.385   4.984  1.00 27.09              
ATOM   1400  O   SER A 208      64.641  14.234   6.166  1.00 25.54              
ATOM   1401  CB  SER A 208      67.494  14.743   4.645  1.00 27.91              
ATOM   1402  OG  SER A 208      67.595  13.832   5.730  1.00 26.46              
ATOM   1403  N   PRO A 209      64.484  13.675   3.980  1.00 26.31              
ATOM   1404  CA  PRO A 209      63.319  12.815   4.179  1.00 25.88              
ATOM   1405  C   PRO A 209      63.612  11.442   4.713  1.00 25.33              
ATOM   1406  O   PRO A 209      64.705  10.934   4.546  1.00 24.81              
ATOM   1407  CB  PRO A 209      62.708  12.745   2.768  1.00 25.53              
ATOM   1408  CG  PRO A 209      63.855  12.853   1.871  1.00 25.96              
ATOM   1409  CD  PRO A 209      64.924  13.645   2.581  1.00 26.42              
ATOM   1410  N   PRO A 210      62.594  10.816   5.299  1.00 25.64              
ATOM   1411  CA  PRO A 210      62.775   9.521   5.965  1.00 25.02              
ATOM   1412  C   PRO A 210      63.341   8.476   5.021  1.00 24.87              
ATOM   1413  O   PRO A 210      64.128   7.634   5.465  1.00 24.46              
ATOM   1414  CB  PRO A 210      61.370   9.147   6.464  1.00 25.32              
ATOM   1415  CG  PRO A 210      60.413  10.149   5.866  1.00 25.78              
ATOM   1416  CD  PRO A 210      61.195  11.287   5.307  1.00 25.28              
ATOM   1417  N   GLU A 211      62.987   8.544   3.737  1.00 24.50              
ATOM   1418  CA  GLU A 211      63.521   7.591   2.772  1.00 24.39              
ATOM   1419  C   GLU A 211      65.042   7.773   2.576  1.00 24.45              
ATOM   1420  O   GLU A 211      65.755   6.812   2.275  1.00 24.84              
ATOM   1421  CB  GLU A 211      62.723   7.599   1.459  1.00 24.30              
ATOM   1422  CG  GLU A 211      62.868   8.855   0.631  1.00 24.77              
ATOM   1423  CD  GLU A 211      61.788   9.885   0.870  1.00 25.94              
ATOM   1424  OE1 GLU A 211      61.189   9.927   1.986  1.00 24.09              
ATOM   1425  OE2 GLU A 211      61.565  10.674  -0.084  1.00 22.28              
ATOM   1426  N   TRP A 212      65.555   8.981   2.770  1.00 25.07              
ATOM   1427  CA  TRP A 212      67.006   9.187   2.700  1.00 25.87              
ATOM   1428  C   TRP A 212      67.666   8.644   3.956  1.00 26.26              
ATOM   1429  O   TRP A 212      68.670   7.943   3.863  1.00 26.12              
ATOM   1430  CB  TRP A 212      67.390  10.666   2.525  1.00 26.86              
ATOM   1431  CG  TRP A 212      68.856  10.916   2.790  1.00 26.24              
ATOM   1432  CD1 TRP A 212      69.403  11.504   3.890  1.00 27.20              
ATOM   1433  CD2 TRP A 212      69.950  10.543   1.949  1.00 28.19              
ATOM   1434  NE1 TRP A 212      70.774  11.533   3.784  1.00 27.86              
ATOM   1435  CE2 TRP A 212      71.140  10.949   2.600  1.00 28.97              
ATOM   1436  CE3 TRP A 212      70.052   9.901   0.710  1.00 27.28              
ATOM   1437  CZ2 TRP A 212      72.410  10.732   2.050  1.00 29.49              
ATOM   1438  CZ3 TRP A 212      71.324   9.682   0.157  1.00 28.76              
ATOM   1439  CH2 TRP A 212      72.480  10.096   0.828  1.00 28.84              
ATOM   1440  N   ILE A 213      67.090   8.952   5.125  1.00 26.66              
ATOM   1441  CA  ILE A 213      67.651   8.519   6.406  1.00 27.64              
ATOM   1442  C   ILE A 213      67.743   6.997   6.501  1.00 27.83              
ATOM   1443  O   ILE A 213      68.771   6.458   6.880  1.00 28.08              
ATOM   1444  CB  ILE A 213      66.789   9.033   7.622  1.00 28.09              
ATOM   1445  CG1 ILE A 213      66.593  10.561   7.628  1.00 27.60              
ATOM   1446  CG2 ILE A 213      67.404   8.562   8.924  1.00 28.03              
ATOM   1447  CD1 ILE A 213      67.873  11.388   7.706  1.00 28.28              
ATOM   1448  N   ARG A 214      66.669   6.310   6.130  1.00 28.52              
ATOM   1449  CA  ARG A 214      66.594   4.847   6.243  1.00 28.95              
ATOM   1450  C   ARG A 214      67.164   4.015   5.113  1.00 28.60              
ATOM   1451  O   ARG A 214      67.509   2.857   5.342  1.00 28.95              
ATOM   1452  CB  ARG A 214      65.140   4.419   6.325  1.00 29.62              
ATOM   1453  CG  ARG A 214      64.359   5.025   7.440  1.00 32.17              
ATOM   1454  CD  ARG A 214      62.917   4.575   7.423  1.00 34.86              
ATOM   1455  NE  ARG A 214      62.823   3.148   7.692  1.00 37.26              
ATOM   1456  CZ  ARG A 214      61.691   2.469   7.715  1.00 38.66              
ATOM   1457  NH1 ARG A 214      60.528   3.079   7.488  1.00 39.88              
ATOM   1458  NH2 ARG A 214      61.721   1.170   7.959  1.00 38.51              
ATOM   1459  N   TYR A 215      67.216   4.570   3.906  1.00 28.14              
ATOM   1460  CA  TYR A 215      67.602   3.804   2.696  1.00 27.89              
ATOM   1461  C   TYR A 215      68.611   4.465   1.754  1.00 27.32              
ATOM   1462  O   TYR A 215      69.057   3.842   0.795  1.00 26.98              
ATOM   1463  CB  TYR A 215      66.342   3.516   1.866  1.00 27.82              
ATOM   1464  CG  TYR A 215      65.232   2.834   2.629  1.00 29.17              
ATOM   1465  CD1 TYR A 215      65.466   1.646   3.327  1.00 32.09              
ATOM   1466  CD2 TYR A 215      63.955   3.369   2.662  1.00 30.07              
ATOM   1467  CE1 TYR A 215      64.439   1.012   4.038  1.00 32.90              
ATOM   1468  CE2 TYR A 215      62.930   2.749   3.364  1.00 31.58              
ATOM   1469  CZ  TYR A 215      63.175   1.576   4.048  1.00 32.98              
ATOM   1470  OH  TYR A 215      62.152   0.964   4.738  1.00 36.26              
ATOM   1471  N   HIS A 216      68.979   5.709   2.011  1.00 27.12              
ATOM   1472  CA  HIS A 216      69.910   6.436   1.140  1.00 27.56              
ATOM   1473  C   HIS A 216      69.379   6.441  -0.310  1.00 26.88              
ATOM   1474  O   HIS A 216      70.123   6.271  -1.280  1.00 26.11              
ATOM   1475  CB  HIS A 216      71.342   5.848   1.257  1.00 28.37              
ATOM   1476  CG  HIS A 216      72.091   6.335   2.464  1.00 31.74              
ATOM   1477  ND1 HIS A 216      73.435   6.085   2.662  1.00 36.24              
ATOM   1478  CD2 HIS A 216      71.683   7.062   3.534  1.00 34.48              
ATOM   1479  CE1 HIS A 216      73.820   6.636   3.803  1.00 38.09              
ATOM   1480  NE2 HIS A 216      72.775   7.236   4.351  1.00 37.78              
ATOM   1481  N   ARG A 217      68.063   6.624  -0.416  1.00 26.15              
ATOM   1482  CA  ARG A 217      67.354   6.705  -1.679  1.00 25.79              
ATOM   1483  C   ARG A 217      66.200   7.706  -1.559  1.00 25.13              
ATOM   1484  O   ARG A 217      65.475   7.734  -0.561  1.00 24.82              
ATOM   1485  CB  ARG A 217      66.734   5.371  -2.054  1.00 25.77              
ATOM   1486  CG  ARG A 217      67.667   4.211  -2.270  1.00 27.20              
ATOM   1487  CD  ARG A 217      66.925   2.883  -2.383  1.00 29.54              
ATOM   1488  NE  ARG A 217      66.157   2.795  -3.628  1.00 32.32              
ATOM   1489  CZ  ARG A 217      66.680   2.527  -4.836  1.00 33.83              
ATOM   1490  NH1 ARG A 217      67.987   2.323  -4.994  1.00 35.15              
ATOM   1491  NH2 ARG A 217      65.896   2.473  -5.904  1.00 33.38              
ATOM   1492  N   TYR A 218      66.045   8.533  -2.577  1.00 24.35              
ATOM   1493  CA  TYR A 218      64.915   9.456  -2.674  1.00 23.97              
ATOM   1494  C   TYR A 218      64.736   9.901  -4.117  1.00 23.89              
ATOM   1495  O   TYR A 218      65.640   9.729  -4.942  1.00 23.89              
ATOM   1496  CB  TYR A 218      65.096  10.682  -1.776  1.00 24.43              
ATOM   1497  CG  TYR A 218      66.309  11.506  -2.131  1.00 24.48              
ATOM   1498  CD1 TYR A 218      67.572  11.189  -1.596  1.00 25.15              
ATOM   1499  CD2 TYR A 218      66.205  12.591  -2.993  1.00 22.99              
ATOM   1500  CE1 TYR A 218      68.697  11.939  -1.931  1.00 26.83              
ATOM   1501  CE2 TYR A 218      67.312  13.358  -3.317  1.00 24.14              
ATOM   1502  CZ  TYR A 218      68.563  13.018  -2.799  1.00 25.88              
ATOM   1503  OH  TYR A 218      69.657  13.788  -3.135  1.00 27.79              
ATOM   1504  N   HIS A 219      63.544  10.413  -4.431  1.00 24.13              
ATOM   1505  CA  HIS A 219      63.267  10.994  -5.751  1.00 24.21              
ATOM   1506  C   HIS A 219      63.175  12.502  -5.526  1.00 25.11              
ATOM   1507  O   HIS A 219      62.729  12.965  -4.460  1.00 24.20              
ATOM   1508  CB  HIS A 219      61.989  10.412  -6.353  1.00 24.51              
ATOM   1509  CG  HIS A 219      62.156   9.022  -6.888  1.00 24.06              
ATOM   1510  ND1 HIS A 219      62.302   7.925  -6.065  1.00 21.47              
ATOM   1511  CD2 HIS A 219      62.223   8.555  -8.161  1.00 22.25              
ATOM   1512  CE1 HIS A 219      62.427   6.842  -6.807  1.00 24.57              
ATOM   1513  NE2 HIS A 219      62.381   7.196  -8.081  1.00 24.11              
ATOM   1514  N   GLY A 220      63.612  13.263  -6.521  1.00 25.35              
ATOM   1515  CA  GLY A 220      63.726  14.707  -6.406  1.00 25.79              
ATOM   1516  C   GLY A 220      62.520  15.471  -5.914  1.00 25.98              
ATOM   1517  O   GLY A 220      62.569  16.155  -4.877  1.00 25.91              
ATOM   1518  N   ARG A 221      61.411  15.312  -6.620  1.00 26.86              
ATOM   1519  CA  ARG A 221      60.210  16.102  -6.335  1.00 26.70              
ATOM   1520  C   ARG A 221      59.692  15.885  -4.918  1.00 26.24              
ATOM   1521  O   ARG A 221      59.523  16.843  -4.163  1.00 25.22              
ATOM   1522  CB  ARG A 221      59.137  15.812  -7.391  1.00 27.75              
ATOM   1523  CG  ARG A 221      59.565  16.329  -8.793  1.00 29.78              
ATOM   1524  CD  ARG A 221      58.743  15.818 -10.007  1.00 31.69              
ATOM   1525  NE  ARG A 221      59.357  16.219 -11.295  1.00 33.50              
ATOM   1526  CZ  ARG A 221      60.203  15.473 -12.003  1.00 37.47              
ATOM   1527  NH1 ARG A 221      60.565  14.265 -11.569  1.00 39.59              
ATOM   1528  NH2 ARG A 221      60.689  15.912 -13.164  1.00 38.02              
ATOM   1529  N   SER A 222      59.511  14.620  -4.550  1.00 25.41              
ATOM   1530  CA  SER A 222      58.980  14.260  -3.236  1.00 24.89              
ATOM   1531  C   SER A 222      59.931  14.588  -2.079  1.00 24.98              
ATOM   1532  O   SER A 222      59.495  14.916  -0.944  1.00 25.68              
ATOM   1533  CB  SER A 222      58.520  12.786  -3.249  1.00 24.53              
ATOM   1534  OG  SER A 222      59.585  11.886  -3.503  1.00 23.43              
ATOM   1535  N   ALA A 223      61.228  14.553  -2.341  1.00 24.62              
ATOM   1536  CA  ALA A 223      62.191  14.969  -1.328  1.00 24.08              
ATOM   1537  C   ALA A 223      62.028  16.462  -1.123  1.00 23.67              
ATOM   1538  O   ALA A 223      62.013  16.927  -0.004  1.00 24.26              
ATOM   1539  CB  ALA A 223      63.616  14.658  -1.762  1.00 24.40              
ATOM   1540  N   ALA A 224      61.930  17.199  -2.222  1.00 24.13              
ATOM   1541  CA  ALA A 224      61.711  18.652  -2.201  1.00 23.84              
ATOM   1542  C   ALA A 224      60.457  18.999  -1.374  1.00 23.50              
ATOM   1543  O   ALA A 224      60.505  19.843  -0.471  1.00 23.07              
ATOM   1544  CB  ALA A 224      61.586  19.186  -3.600  1.00 23.52              
ATOM   1545  N   VAL A 225      59.362  18.304  -1.658  1.00 22.99              
ATOM   1546  CA  VAL A 225      58.114  18.533  -0.924  1.00 23.16              
ATOM   1547  C   VAL A 225      58.266  18.239   0.550  1.00 22.90              
ATOM   1548  O   VAL A 225      57.672  18.915   1.391  1.00 24.05              
ATOM   1549  CB  VAL A 225      56.948  17.736  -1.554  1.00 22.67              
ATOM   1550  CG1 VAL A 225      55.726  17.768  -0.677  1.00 22.76              
ATOM   1551  CG2 VAL A 225      56.658  18.314  -2.924  1.00 24.47              
ATOM   1552  N   TRP A 226      59.040  17.229   0.889  1.00 23.66              
ATOM   1553  CA  TRP A 226      59.305  16.931   2.304  1.00 22.97              
ATOM   1554  C   TRP A 226      60.016  18.125   2.987  1.00 23.82              
ATOM   1555  O   TRP A 226      59.626  18.527   4.070  1.00 24.12              
ATOM   1556  CB  TRP A 226      60.127  15.646   2.464  1.00 23.21              
ATOM   1557  CG  TRP A 226      60.598  15.477   3.886  1.00 20.50              
ATOM   1558  CD1 TRP A 226      61.666  16.069   4.455  1.00 21.71              
ATOM   1559  CD2 TRP A 226      59.969  14.705   4.899  1.00 20.10              
ATOM   1560  NE1 TRP A 226      61.777  15.703   5.781  1.00 23.74              
ATOM   1561  CE2 TRP A 226      60.740  14.858   6.086  1.00 21.43              
ATOM   1562  CE3 TRP A 226      58.847  13.859   4.925  1.00 21.22              
ATOM   1563  CZ2 TRP A 226      60.408  14.238   7.283  1.00 22.05              
ATOM   1564  CZ3 TRP A 226      58.518  13.215   6.130  1.00 20.73              
ATOM   1565  CH2 TRP A 226      59.300  13.414   7.290  1.00 23.23              
ATOM   1566  N   SER A 227      61.068  18.663   2.372  1.00 22.91              
ATOM   1567  CA  SER A 227      61.774  19.791   2.932  1.00 24.37              
ATOM   1568  C   SER A 227      60.905  21.028   2.991  1.00 24.46              
ATOM   1569  O   SER A 227      61.052  21.832   3.909  1.00 25.77              
ATOM   1570  CB  SER A 227      63.080  20.102   2.180  1.00 24.83              
ATOM   1571  OG  SER A 227      62.818  20.434   0.833  1.00 27.19              
ATOM   1572  N   LEU A 228      59.982  21.162   2.050  1.00 25.09              
ATOM   1573  CA  LEU A 228      59.058  22.285   2.045  1.00 24.95              
ATOM   1574  C   LEU A 228      58.121  22.204   3.236  1.00 24.67              
ATOM   1575  O   LEU A 228      57.794  23.217   3.807  1.00 24.88              
ATOM   1576  CB  LEU A 228      58.301  22.353   0.743  1.00 24.95              
ATOM   1577  CG  LEU A 228      59.180  22.855  -0.409  1.00 24.47              
ATOM   1578  CD1 LEU A 228      58.450  22.544  -1.679  1.00 24.88              
ATOM   1579  CD2 LEU A 228      59.463  24.350  -0.309  1.00 27.25              
ATOM   1580  N   GLY A 229      57.726  20.992   3.621  1.00 24.61              
ATOM   1581  CA  GLY A 229      56.968  20.785   4.837  1.00 25.16              
ATOM   1582  C   GLY A 229      57.755  21.168   6.080  1.00 24.98              
ATOM   1583  O   GLY A 229      57.190  21.786   7.014  1.00 25.72              
ATOM   1584  N   ILE A 230      59.049  20.841   6.101  1.00 24.45              
ATOM   1585  CA  ILE A 230      59.893  21.211   7.230  1.00 24.35              
ATOM   1586  C   ILE A 230      59.983  22.737   7.286  1.00 24.81              
ATOM   1587  O   ILE A 230      59.912  23.324   8.377  1.00 23.66              
ATOM   1588  CB  ILE A 230      61.325  20.583   7.164  1.00 25.10              
ATOM   1589  CG1 ILE A 230      61.297  19.043   7.195  1.00 24.64              
ATOM   1590  CG2 ILE A 230      62.183  21.077   8.304  1.00 24.04              
ATOM   1591  CD1 ILE A 230      60.679  18.397   8.435  1.00 22.43              
ATOM   1592  N   LEU A 231      60.104  23.376   6.121  1.00 24.99              
ATOM   1593  CA  LEU A 231      60.207  24.835   6.052  1.00 25.42              
ATOM   1594  C   LEU A 231      58.930  25.524   6.532  1.00 25.82              
ATOM   1595  O   LEU A 231      58.988  26.537   7.245  1.00 25.84              
ATOM   1596  CB  LEU A 231      60.503  25.269   4.635  1.00 25.91              
ATOM   1597  CG  LEU A 231      60.592  26.769   4.373  1.00 26.43              
ATOM   1598  CD1 LEU A 231      61.871  27.285   4.959  1.00 30.05              
ATOM   1599  CD2 LEU A 231      60.512  27.049   2.908  1.00 27.96              
ATOM   1600  N   LEU A 232      57.784  24.989   6.151  1.00 25.68              
ATOM   1601  CA  LEU A 232      56.509  25.593   6.554  1.00 25.42              
ATOM   1602  C   LEU A 232      56.329  25.481   8.056  1.00 25.23              
ATOM   1603  O   LEU A 232      55.964  26.455   8.693  1.00 26.10              
ATOM   1604  CB  LEU A 232      55.322  24.953   5.817  1.00 25.44              
ATOM   1605  CG  LEU A 232      53.933  25.546   6.078  1.00 24.67              
ATOM   1606  CD1 LEU A 232      53.879  27.054   5.934  1.00 25.05              
ATOM   1607  CD2 LEU A 232      52.911  24.883   5.132  1.00 27.16              
ATOM   1608  N   TYR A 233      56.589  24.308   8.617  1.00 24.96              
ATOM   1609  CA  TYR A 233      56.524  24.115  10.070  1.00 25.17              
ATOM   1610  C   TYR A 233      57.438  25.127  10.730  1.00 25.23              
ATOM   1611  O   TYR A 233      57.068  25.761  11.714  1.00 25.61              
ATOM   1612  CB  TYR A 233      56.959  22.706  10.482  1.00 25.36              
ATOM   1613  CG  TYR A 233      56.837  22.447  11.960  1.00 24.16              
ATOM   1614  CD1 TYR A 233      57.790  22.904  12.841  1.00 23.21              
ATOM   1615  CD2 TYR A 233      55.756  21.735  12.475  1.00 25.55              
ATOM   1616  CE1 TYR A 233      57.687  22.681  14.183  1.00 24.89              
ATOM   1617  CE2 TYR A 233      55.626  21.507  13.841  1.00 25.62              
ATOM   1618  CZ  TYR A 233      56.591  21.981  14.689  1.00 25.54              
ATOM   1619  OH  TYR A 233      56.496  21.753  16.039  1.00 23.07              
ATOM   1620  N   ASP A 234      58.644  25.262  10.183  1.00 25.44              
ATOM   1621  CA  ASP A 234      59.633  26.196  10.716  1.00 25.94              
ATOM   1622  C   ASP A 234      59.086  27.630  10.759  1.00 25.26              
ATOM   1623  O   ASP A 234      59.247  28.343  11.753  1.00 24.48              
ATOM   1624  CB  ASP A 234      60.899  26.106   9.867  1.00 26.09              
ATOM   1625  CG  ASP A 234      62.002  27.029  10.325  1.00 28.59              
ATOM   1626  OD1 ASP A 234      62.296  27.112  11.538  1.00 27.06              
ATOM   1627  OD2 ASP A 234      62.663  27.679   9.488  1.00 31.59              
ATOM   1628  N   MET A 235      58.388  28.008   9.699  1.00 24.28              
ATOM   1629  CA  MET A 235      57.832  29.334   9.574  1.00 24.66              
ATOM   1630  C   MET A 235      56.732  29.624  10.585  1.00 24.20              
ATOM   1631  O   MET A 235      56.793  30.649  11.250  1.00 25.08              
ATOM   1632  CB  MET A 235      57.317  29.555   8.149  1.00 24.74              
ATOM   1633  CG  MET A 235      58.419  29.847   7.174  1.00 27.89              
ATOM   1634  SD  MET A 235      57.768  30.444   5.605  1.00 33.38              
ATOM   1635  CE  MET A 235      57.027  29.170   5.020  1.00 31.44              
ATOM   1636  N   VAL A 236      55.757  28.725  10.718  1.00 23.64              
ATOM   1637  CA  VAL A 236      54.614  28.933  11.624  1.00 23.42              
ATOM   1638  C   VAL A 236      54.843  28.578  13.095  1.00 23.64              
ATOM   1639  O   VAL A 236      54.104  29.030  13.950  1.00 24.36              
ATOM   1640  CB  VAL A 236      53.326  28.262  11.086  1.00 23.25              
ATOM   1641  CG1 VAL A 236      52.963  28.846   9.711  1.00 22.95              
ATOM   1642  CG2 VAL A 236      53.456  26.779  10.967  1.00 22.98              
ATOM   1643  N   CYS A 237      55.882  27.809  13.394  1.00 24.16              
ATOM   1644  CA  CYS A 237      56.198  27.421  14.787  1.00 24.57              
ATOM   1645  C   CYS A 237      57.484  28.052  15.317  1.00 25.10              
ATOM   1646  O   CYS A 237      57.749  27.999  16.523  1.00 25.03              
ATOM   1647  CB  CYS A 237      56.331  25.908  14.890  1.00 25.14              
ATOM   1648  SG  CYS A 237      54.803  25.005  14.630  1.00 25.50              
ATOM   1649  N   GLY A 238      58.299  28.625  14.426  1.00 25.52              
ATOM   1650  CA  GLY A 238      59.541  29.276  14.817  1.00 26.68              
ATOM   1651  C   GLY A 238      60.765  28.385  14.998  1.00 27.38              
ATOM   1652  O   GLY A 238      61.809  28.870  15.445  1.00 26.99              
ATOM   1653  N   ASP A 239      60.646  27.114  14.617  1.00 28.09              
ATOM   1654  CA  ASP A 239      61.737  26.123  14.719  1.00 29.16              
ATOM   1655  C   ASP A 239      61.395  24.884  13.896  1.00 28.48              
ATOM   1656  O   ASP A 239      60.227  24.613  13.678  1.00 29.08              
ATOM   1657  CB  ASP A 239      61.941  25.661  16.177  1.00 28.98              
ATOM   1658  CG  ASP A 239      62.879  26.552  16.953  1.00 33.13              
ATOM   1659  OD1 ASP A 239      64.070  26.670  16.586  1.00 35.07              
ATOM   1660  OD2 ASP A 239      62.508  27.176  17.970  1.00 37.08              
ATOM   1661  N   ILE A 240      62.387  24.102  13.476  1.00 28.64              
ATOM   1662  CA  ILE A 240      62.092  22.867  12.742  1.00 28.72              
ATOM   1663  C   ILE A 240      61.430  21.842  13.677  1.00 29.07              
ATOM   1664  O   ILE A 240      61.611  21.918  14.883  1.00 29.10              
ATOM   1665  CB  ILE A 240      63.361  22.266  12.083  1.00 28.95              
ATOM   1666  CG1 ILE A 240      64.460  21.993  13.117  1.00 29.82              
ATOM   1667  CG2 ILE A 240      63.874  23.190  11.005  1.00 29.49              
ATOM   1668  CD1 ILE A 240      65.766  21.455  12.513  1.00 28.89              
ATOM   1669  N   PRO A 241      60.661  20.900  13.135  1.00 29.57              
ATOM   1670  CA  PRO A 241      59.984  19.888  13.963  1.00 30.25              
ATOM   1671  C   PRO A 241      60.854  18.721  14.410  1.00 30.78              
ATOM   1672  O   PRO A 241      60.633  18.174  15.483  1.00 29.94              
ATOM   1673  CB  PRO A 241      58.868  19.381  13.046  1.00 29.69              
ATOM   1674  CG  PRO A 241      59.451  19.508  11.627  1.00 30.34              
ATOM   1675  CD  PRO A 241      60.343  20.739  11.702  1.00 29.91              
ATOM   1676  N   PHE A 242      61.820  18.341  13.580  1.00 31.99              
ATOM   1677  CA  PHE A 242      62.662  17.176  13.835  1.00 32.28              
ATOM   1678  C   PHE A 242      64.132  17.530  13.976  1.00 33.66              
ATOM   1679  O   PHE A 242      64.683  18.219  13.132  1.00 34.94              
ATOM   1680  CB  PHE A 242      62.537  16.203  12.671  1.00 31.64              
ATOM   1681  CG  PHE A 242      61.116  15.849  12.298  1.00 30.41              
ATOM   1682  CD1 PHE A 242      60.185  15.475  13.274  1.00 28.45              
ATOM   1683  CD2 PHE A 242      60.718  15.840  10.957  1.00 26.35              
ATOM   1684  CE1 PHE A 242      58.880  15.123  12.931  1.00 26.62              
ATOM   1685  CE2 PHE A 242      59.423  15.481  10.610  1.00 26.94              
ATOM   1686  CZ  PHE A 242      58.498  15.119  11.590  1.00 27.06              
ATOM   1687  N   GLU A 243      64.773  17.055  15.036  1.00 34.28              
ATOM   1688  CA  GLU A 243      66.206  17.261  15.214  1.00 35.05              
ATOM   1689  C   GLU A 243      66.982  15.949  15.040  1.00 34.46              
ATOM   1690  O   GLU A 243      68.101  15.964  14.530  1.00 35.45              
ATOM   1691  CB  GLU A 243      66.497  17.866  16.587  1.00 36.18              
ATOM   1692  CG  GLU A 243      65.946  19.276  16.772  1.00 39.21              
ATOM   1693  CD  GLU A 243      67.012  20.373  16.639  1.00 44.02              
ATOM   1694  OE1 GLU A 243      67.958  20.427  17.482  1.00 46.42              
ATOM   1695  OE2 GLU A 243      66.894  21.197  15.696  1.00 46.48              
ATOM   1696  N   HIS A 244      66.392  14.821  15.432  1.00 33.15              
ATOM   1697  CA  HIS A 244      67.068  13.528  15.332  1.00 33.14              
ATOM   1698  C   HIS A 244      66.519  12.610  14.241  1.00 32.04              
ATOM   1699  O   HIS A 244      65.371  12.741  13.815  1.00 30.83              
ATOM   1700  CB  HIS A 244      67.039  12.803  16.682  1.00 33.37              
ATOM   1701  CG  HIS A 244      67.441  13.664  17.834  1.00 35.95              
ATOM   1702  ND1 HIS A 244      66.521  14.271  18.667  1.00 37.91              
ATOM   1703  CD2 HIS A 244      68.661  14.041  18.282  1.00 39.05              
ATOM   1704  CE1 HIS A 244      67.157  14.986  19.576  1.00 39.13              
ATOM   1705  NE2 HIS A 244      68.457  14.853  19.372  1.00 40.82              
ATOM   1706  N   ASP A 245      67.376  11.697  13.788  1.00 31.38              
ATOM   1707  CA  ASP A 245      67.020  10.690  12.796  1.00 31.41              
ATOM   1708  C   ASP A 245      65.754   9.929  13.194  1.00 31.02              
ATOM   1709  O   ASP A 245      64.876   9.685  12.362  1.00 30.52              
ATOM   1710  CB  ASP A 245      68.155   9.672  12.660  1.00 32.09              
ATOM   1711  CG  ASP A 245      69.294  10.174  11.805  1.00 32.57              
ATOM   1712  OD1 ASP A 245      69.380  11.395  11.535  1.00 32.79              
ATOM   1713  OD2 ASP A 245      70.163   9.396  11.371  1.00 34.07              
ATOM   1714  N   GLU A 246      65.694   9.553  14.469  1.00 30.89              
ATOM   1715  CA  GLU A 246      64.552   8.853  15.070  1.00 31.36              
ATOM   1716  C   GLU A 246      63.237   9.595  14.798  1.00 31.04              
ATOM   1717  O   GLU A 246      62.228   9.006  14.429  1.00 30.24              
ATOM   1718  CB  GLU A 246      64.750   8.768  16.598  1.00 32.06              
ATOM   1719  CG  GLU A 246      66.069   8.152  17.082  1.00 35.00              
ATOM   1720  CD  GLU A 246      67.268   9.120  17.074  1.00 39.07              
ATOM   1721  OE1 GLU A 246      67.316  10.067  17.909  1.00 42.63              
ATOM   1722  OE2 GLU A 246      68.182   8.931  16.234  1.00 40.89              
ATOM   1723  N   GLU A 247      63.278  10.914  14.975  1.00 31.12              
ATOM   1724  CA  GLU A 247      62.101  11.768  14.803  1.00 30.97              
ATOM   1725  C   GLU A 247      61.646  11.876  13.356  1.00 30.13              
ATOM   1726  O   GLU A 247      60.442  11.860  13.087  1.00 29.90              
ATOM   1727  CB  GLU A 247      62.357  13.149  15.419  1.00 31.42              
ATOM   1728  CG  GLU A 247      62.296  13.119  16.949  1.00 32.05              
ATOM   1729  CD  GLU A 247      62.951  14.310  17.638  1.00 33.83              
ATOM   1730  OE1 GLU A 247      63.632  15.106  16.991  1.00 32.85              
ATOM   1731  OE2 GLU A 247      62.800  14.447  18.871  1.00 38.13              
ATOM   1732  N   ILE A 248      62.604  11.948  12.430  1.00 29.64              
ATOM   1733  CA  ILE A 248      62.308  12.020  11.002  1.00 29.02              
ATOM   1734  C   ILE A 248      61.602  10.751  10.528  1.00 28.98              
ATOM   1735  O   ILE A 248      60.595  10.822   9.831  1.00 28.37              
ATOM   1736  CB  ILE A 248      63.614  12.253  10.186  1.00 28.93              
ATOM   1737  CG1 ILE A 248      64.182  13.652  10.459  1.00 29.08              
ATOM   1738  CG2 ILE A 248      63.356  12.108   8.714  1.00 28.74              
ATOM   1739  CD1 ILE A 248      65.538  13.897   9.883  1.00 29.40              
ATOM   1740  N   ILE A 249      62.132   9.588  10.912  1.00 28.91              
ATOM   1741  CA  ILE A 249      61.589   8.287  10.480  1.00 29.05              
ATOM   1742  C   ILE A 249      60.223   8.016  11.102  1.00 28.82              
ATOM   1743  O   ILE A 249      59.381   7.336  10.515  1.00 28.85              
ATOM   1744  CB  ILE A 249      62.570   7.125  10.828  1.00 29.50              
ATOM   1745  CG1 ILE A 249      63.883   7.265  10.061  1.00 29.72              
ATOM   1746  CG2 ILE A 249      61.923   5.748  10.570  1.00 30.63              
ATOM   1747  CD1 ILE A 249      65.059   6.475  10.716  1.00 30.75              
ATOM   1748  N   ARG A 250      59.997   8.534  12.301  1.00 28.83              
ATOM   1749  CA  ARG A 250      58.691   8.365  12.931  1.00 28.68              
ATOM   1750  C   ARG A 250      57.684   9.256  12.207  1.00 28.24              
ATOM   1751  O   ARG A 250      56.560   8.859  11.999  1.00 27.99              
ATOM   1752  CB  ARG A 250      58.743   8.676  14.432  1.00 28.41              
ATOM   1753  CG  ARG A 250      57.467   8.344  15.178  1.00 27.96              
ATOM   1754  CD  ARG A 250      57.685   7.946  16.612  1.00 28.81              
ATOM   1755  NE  ARG A 250      56.398   7.806  17.302  1.00 29.34              
ATOM   1756  CZ  ARG A 250      55.778   8.777  17.983  1.00 27.92              
ATOM   1757  NH1 ARG A 250      56.324   9.976  18.138  1.00 24.12              
ATOM   1758  NH2 ARG A 250      54.615   8.522  18.558  1.00 30.85              
ATOM   1759  N   GLY A 251      58.120  10.449  11.809  1.00 28.63              
ATOM   1760  CA  GLY A 251      57.275  11.407  11.111  1.00 29.17              
ATOM   1761  C   GLY A 251      56.058  11.926  11.872  1.00 29.45              
ATOM   1762  O   GLY A 251      55.077  12.312  11.248  1.00 29.41              
ATOM   1763  N   GLN A 252      56.132  11.960  13.203  1.00 29.55              
ATOM   1764  CA  GLN A 252      55.042  12.471  14.049  1.00 30.08              
ATOM   1765  C   GLN A 252      55.230  13.979  14.290  1.00 29.68              
ATOM   1766  O   GLN A 252      56.232  14.407  14.855  1.00 29.81              
ATOM   1767  CB  GLN A 252      55.012  11.709  15.380  1.00 30.47              
ATOM   1768  CG  GLN A 252      53.822  12.023  16.286  1.00 32.05              
ATOM   1769  CD  GLN A 252      52.481  11.631  15.673  1.00 34.16              
ATOM   1770  OE1 GLN A 252      51.519  12.425  15.700  1.00 34.07              
ATOM   1771  NE2 GLN A 252      52.409  10.422  15.114  1.00 31.51              
ATOM   1772  N   VAL A 253      54.260  14.775  13.859  1.00 28.75              
ATOM   1773  CA  VAL A 253      54.327  16.237  13.971  1.00 28.63              
ATOM   1774  C   VAL A 253      53.581  16.746  15.195  1.00 27.73              
ATOM   1775  O   VAL A 253      52.386  16.512  15.335  1.00 27.29              
ATOM   1776  CB  VAL A 253      53.728  16.884  12.707  1.00 28.56              
ATOM   1777  CG1 VAL A 253      53.924  18.389  12.696  1.00 29.57              
ATOM   1778  CG2 VAL A 253      54.344  16.268  11.487  1.00 29.29              
ATOM   1779  N   PHE A 254      54.296  17.425  16.082  1.00 27.40              
ATOM   1780  CA  PHE A 254      53.705  18.055  17.267  1.00 27.04              
ATOM   1781  C   PHE A 254      53.807  19.561  17.077  1.00 27.18              
ATOM   1782  O   PHE A 254      54.906  20.079  16.877  1.00 26.02              
ATOM   1783  CB  PHE A 254      54.465  17.696  18.541  1.00 26.65              
ATOM   1784  CG  PHE A 254      54.113  18.577  19.739  1.00 26.76              
ATOM   1785  CD1 PHE A 254      52.980  18.329  20.488  1.00 26.83              
ATOM   1786  CD2 PHE A 254      54.935  19.642  20.120  1.00 27.42              
ATOM   1787  CE1 PHE A 254      52.653  19.126  21.602  1.00 26.40              
ATOM   1788  CE2 PHE A 254      54.604  20.449  21.228  1.00 26.07              
ATOM   1789  CZ  PHE A 254      53.463  20.186  21.951  1.00 26.58              
ATOM   1790  N   PHE A 255      52.685  20.263  17.175  1.00 27.66              
ATOM   1791  CA  PHE A 255      52.706  21.710  17.011  1.00 28.51              
ATOM   1792  C   PHE A 255      52.883  22.363  18.355  1.00 28.99              
ATOM   1793  O   PHE A 255      52.122  22.121  19.287  1.00 29.43              
ATOM   1794  CB  PHE A 255      51.481  22.197  16.256  1.00 28.96              
ATOM   1795  CG  PHE A 255      51.563  21.919  14.799  1.00 29.11              
ATOM   1796  CD1 PHE A 255      52.035  22.877  13.926  1.00 30.64              
ATOM   1797  CD2 PHE A 255      51.223  20.675  14.304  1.00 30.61              
ATOM   1798  CE1 PHE A 255      52.137  22.609  12.575  1.00 32.30              
ATOM   1799  CE2 PHE A 255      51.317  20.392  12.948  1.00 30.91              
ATOM   1800  CZ  PHE A 255      51.772  21.353  12.081  1.00 32.78              
ATOM   1801  N   ARG A 256      53.974  23.123  18.463  1.00 29.72              
ATOM   1802  CA  ARG A 256      54.330  23.809  19.687  1.00 30.42              
ATOM   1803  C   ARG A 256      53.709  25.208  19.763  1.00 29.75              
ATOM   1804  O   ARG A 256      53.644  25.793  20.836  1.00 30.75              
ATOM   1805  CB  ARG A 256      55.863  23.845  19.862  1.00 30.65              
ATOM   1806  CG  ARG A 256      56.650  24.685  18.861  1.00 32.55              
ATOM   1807  CD  ARG A 256      58.171  24.504  18.990  1.00 35.37              
ATOM   1808  NE  ARG A 256      58.613  23.316  18.258  1.00 37.22              
ATOM   1809  CZ  ARG A 256      59.882  22.938  18.110  1.00 38.26              
ATOM   1810  NH1 ARG A 256      60.872  23.649  18.649  1.00 38.64              
ATOM   1811  NH2 ARG A 256      60.159  21.832  17.426  1.00 35.61              
ATOM   1812  N   GLN A 257      53.287  25.738  18.620  1.00 28.77              
ATOM   1813  CA  GLN A 257      52.605  27.021  18.540  1.00 28.20              
ATOM   1814  C   GLN A 257      51.193  26.808  18.022  1.00 26.62              
ATOM   1815  O   GLN A 257      50.905  25.791  17.401  1.00 26.06              
ATOM   1816  CB  GLN A 257      53.315  27.912  17.541  1.00 28.73              
ATOM   1817  CG  GLN A 257      54.617  28.466  18.026  1.00 31.38              
ATOM   1818  CD  GLN A 257      54.423  29.715  18.822  1.00 33.86              
ATOM   1819  OE1 GLN A 257      53.739  30.645  18.379  1.00 36.08              
ATOM   1820  NE2 GLN A 257      55.006  29.749  20.003  1.00 36.05              
ATOM   1821  N   ARG A 258      50.326  27.788  18.244  1.00 25.27              
ATOM   1822  CA  ARG A 258      48.975  27.712  17.723  1.00 24.58              
ATOM   1823  C   ARG A 258      49.085  27.833  16.205  1.00 23.72              
ATOM   1824  O   ARG A 258      49.636  28.809  15.705  1.00 23.95              
ATOM   1825  CB  ARG A 258      48.101  28.835  18.274  1.00 24.35              
ATOM   1826  CG  ARG A 258      46.616  28.679  17.963  1.00 26.28              
ATOM   1827  CD  ARG A 258      46.173  29.007  16.530  1.00 29.10              
ATOM   1828  NE  ARG A 258      44.923  28.312  16.183  1.00 30.56              
ATOM   1829  CZ  ARG A 258      44.166  28.574  15.111  1.00 31.86              
ATOM   1830  NH1 ARG A 258      44.540  29.483  14.196  1.00 32.94              
ATOM   1831  NH2 ARG A 258      43.045  27.879  14.923  1.00 30.51              
ATOM   1832  N   VAL A 259      48.568  26.849  15.484  1.00 22.71              
ATOM   1833  CA  VAL A 259      48.587  26.844  14.009  1.00 22.29              
ATOM   1834  C   VAL A 259      47.215  26.333  13.547  1.00 22.37              
ATOM   1835  O   VAL A 259      46.681  25.357  14.114  1.00 20.92              
ATOM   1836  CB  VAL A 259      49.701  25.937  13.471  1.00 22.53              
ATOM   1837  CG1 VAL A 259      49.663  25.800  11.931  1.00 23.79              
ATOM   1838  CG2 VAL A 259      51.085  26.431  13.933  1.00 22.02              
ATOM   1839  N   SER A 260      46.649  27.007  12.543  1.00 22.08              
ATOM   1840  CA  SER A 260      45.333  26.670  11.992  1.00 22.43              
ATOM   1841  C   SER A 260      45.316  25.220  11.533  1.00 22.53              
ATOM   1842  O   SER A 260      46.353  24.682  11.162  1.00 21.80              
ATOM   1843  CB  SER A 260      44.960  27.596  10.809  1.00 22.51              
ATOM   1844  OG  SER A 260      45.793  27.351   9.682  1.00 23.78              
ATOM   1845  N   SER A 261      44.138  24.590  11.561  1.00 22.99              
ATOM   1846  CA  SER A 261      43.982  23.189  11.143  1.00 23.08              
ATOM   1847  C   SER A 261      44.283  23.008   9.652  1.00 23.92              
ATOM   1848  O   SER A 261      44.735  21.939   9.229  1.00 22.82              
ATOM   1849  CB  SER A 261      42.577  22.690  11.426  1.00 23.65              
ATOM   1850  OG  SER A 261      42.327  22.607  12.815  1.00 24.75              
ATOM   1851  N   GLU A 262      44.030  24.050   8.871  1.00 24.54              
ATOM   1852  CA  GLU A 262      44.285  24.007   7.433  1.00 26.37              
ATOM   1853  C   GLU A 262      45.804  23.943   7.218  1.00 26.21              
ATOM   1854  O   GLU A 262      46.314  23.100   6.472  1.00 26.32              
ATOM   1855  CB  GLU A 262      43.672  25.234   6.736  1.00 26.80              
ATOM   1856  CG  GLU A 262      42.182  25.119   6.442  1.00 29.58              
ATOM   1857  CD  GLU A 262      41.579  26.400   5.868  1.00 34.19              
ATOM   1858  OE1 GLU A 262      42.274  27.462   5.816  1.00 38.37              
ATOM   1859  OE2 GLU A 262      40.387  26.353   5.468  1.00 37.08              
ATOM   1860  N   CYS A 263      46.533  24.799   7.926  1.00 26.81              
ATOM   1861  CA  CYS A 263      47.982  24.819   7.833  1.00 26.21              
ATOM   1862  C   CYS A 263      48.586  23.514   8.352  1.00 26.58              
ATOM   1863  O   CYS A 263      49.473  22.938   7.694  1.00 27.19              
ATOM   1864  CB  CYS A 263      48.562  26.018   8.580  1.00 26.27              
ATOM   1865  SG  CYS A 263      50.336  26.231   8.366  1.00 27.67              
ATOM   1866  N   GLN A 264      48.127  23.045   9.515  1.00 26.24              
ATOM   1867  CA  GLN A 264      48.586  21.762  10.079  1.00 26.39              
ATOM   1868  C   GLN A 264      48.366  20.630   9.069  1.00 26.51              
ATOM   1869  O   GLN A 264      49.234  19.763   8.910  1.00 26.80              
ATOM   1870  CB  GLN A 264      47.833  21.406  11.367  1.00 26.53              
ATOM   1871  CG  GLN A 264      48.211  22.274  12.570  1.00 25.73              
ATOM   1872  CD  GLN A 264      47.756  21.702  13.905  1.00 27.16              
ATOM   1873  OE1 GLN A 264      47.584  20.476  14.061  1.00 27.20              
ATOM   1874  NE2 GLN A 264      47.576  22.583  14.883  1.00 26.77              
ATOM   1875  N   HIS A 265      47.223  20.662   8.381  1.00 25.65              
ATOM   1876  CA  HIS A 265      46.871  19.633   7.397  1.00 25.79              
ATOM   1877  C   HIS A 265      47.889  19.591   6.259  1.00 24.77              
ATOM   1878  O   HIS A 265      48.410  18.535   5.958  1.00 24.12              
ATOM   1879  CB  HIS A 265      45.458  19.830   6.817  1.00 25.67              
ATOM   1880  CG  HIS A 265      45.092  18.804   5.789  1.00 27.31              
ATOM   1881  ND1 HIS A 265      45.435  18.930   4.457  1.00 28.50              
ATOM   1882  CD2 HIS A 265      44.472  17.601   5.907  1.00 27.48              
ATOM   1883  CE1 HIS A 265      45.019  17.863   3.796  1.00 27.59              
ATOM   1884  NE2 HIS A 265      44.440  17.040   4.654  1.00 26.52              
ATOM   1885  N   LEU A 266      48.155  20.742   5.644  1.00 24.84              
ATOM   1886  CA  LEU A 266      49.122  20.834   4.556  1.00 24.45              
ATOM   1887  C   LEU A 266      50.545  20.410   4.969  1.00 24.67              
ATOM   1888  O   LEU A 266      51.246  19.716   4.226  1.00 23.84              
ATOM   1889  CB  LEU A 266      49.102  22.243   3.952  1.00 25.80              
ATOM   1890  CG  LEU A 266      50.179  22.633   2.956  1.00 23.83              
ATOM   1891  CD1 LEU A 266      49.958  21.928   1.673  1.00 24.40              
ATOM   1892  CD2 LEU A 266      50.187  24.141   2.742  1.00 26.63              
ATOM   1893  N   ILE A 267      50.953  20.792   6.170  1.00 24.98              
ATOM   1894  CA  ILE A 267      52.273  20.453   6.697  1.00 25.17              
ATOM   1895  C   ILE A 267      52.348  18.960   6.830  1.00 24.67              
ATOM   1896  O   ILE A 267      53.310  18.348   6.428  1.00 24.63              
ATOM   1897  CB  ILE A 267      52.499  21.101   8.084  1.00 24.79              
ATOM   1898  CG1 ILE A 267      52.780  22.591   7.902  1.00 26.23              
ATOM   1899  CG2 ILE A 267      53.663  20.451   8.771  1.00 25.92              
ATOM   1900  CD1 ILE A 267      52.887  23.353   9.198  1.00 26.11              
ATOM   1901  N   ARG A 268      51.317  18.386   7.435  1.00 25.20              
ATOM   1902  CA  ARG A 268      51.232  16.959   7.654  1.00 25.18              
ATOM   1903  C   ARG A 268      51.244  16.219   6.338  1.00 24.56              
ATOM   1904  O   ARG A 268      51.832  15.140   6.251  1.00 24.60              
ATOM   1905  CB  ARG A 268      49.970  16.604   8.434  1.00 26.41              
ATOM   1906  CG  ARG A 268      50.090  16.865   9.932  1.00 28.75              
ATOM   1907  CD  ARG A 268      48.698  17.069  10.619  1.00 34.29              
ATOM   1908  NE  ARG A 268      48.765  17.629  11.983  1.00 34.74              
ATOM   1909  CZ  ARG A 268      49.470  17.076  12.960  1.00 33.43              
ATOM   1910  NH1 ARG A 268      50.149  15.965  12.732  1.00 34.37              
ATOM   1911  NH2 ARG A 268      49.503  17.622  14.163  1.00 31.28              
ATOM   1912  N   TRP A 269      50.609  16.806   5.328  1.00 23.92              
ATOM   1913  CA  TRP A 269      50.532  16.208   3.998  1.00 24.65              
ATOM   1914  C   TRP A 269      51.930  16.211   3.367  1.00 24.53              
ATOM   1915  O   TRP A 269      52.380  15.186   2.893  1.00 25.15              
ATOM   1916  CB  TRP A 269      49.453  16.940   3.160  1.00 24.56              
ATOM   1917  CG  TRP A 269      49.050  16.269   1.890  1.00 25.61              
ATOM   1918  CD1 TRP A 269      49.342  14.997   1.511  1.00 25.15              
ATOM   1919  CD2 TRP A 269      48.243  16.828   0.835  1.00 26.77              
ATOM   1920  NE1 TRP A 269      48.806  14.742   0.269  1.00 26.75              
ATOM   1921  CE2 TRP A 269      48.113  15.847  -0.157  1.00 26.08              
ATOM   1922  CE3 TRP A 269      47.626  18.070   0.630  1.00 27.64              
ATOM   1923  CZ2 TRP A 269      47.395  16.061  -1.339  1.00 29.54              
ATOM   1924  CZ3 TRP A 269      46.928  18.285  -0.531  1.00 28.97              
ATOM   1925  CH2 TRP A 269      46.810  17.281  -1.507  1.00 28.96              
ATOM   1926  N   CYS A 270      52.649  17.338   3.459  1.00 25.48              
ATOM   1927  CA  CYS A 270      54.016  17.449   2.941  1.00 24.93              
ATOM   1928  C   CYS A 270      54.963  16.509   3.674  1.00 24.40              
ATOM   1929  O   CYS A 270      55.932  16.025   3.098  1.00 24.09              
ATOM   1930  CB  CYS A 270      54.545  18.880   3.075  1.00 25.20              
ATOM   1931  SG  CYS A 270      53.718  20.125   2.066  1.00 26.33              
ATOM   1932  N   LEU A 271      54.693  16.245   4.954  1.00 23.85              
ATOM   1933  CA  LEU A 271      55.540  15.359   5.737  1.00 24.10              
ATOM   1934  C   LEU A 271      55.010  13.928   5.787  1.00 24.50              
ATOM   1935  O   LEU A 271      55.275  13.199   6.729  1.00 24.05              
ATOM   1936  CB  LEU A 271      55.735  15.919   7.152  1.00 23.45              
ATOM   1937  CG  LEU A 271      56.435  17.283   7.209  1.00 23.99              
ATOM   1938  CD1 LEU A 271      56.553  17.819   8.642  1.00 25.48              
ATOM   1939  CD2 LEU A 271      57.838  17.174   6.569  1.00 24.47              
ATOM   1940  N   ALA A 272      54.285  13.491   4.754  1.00 26.03              
ATOM   1941  CA  ALA A 272      53.819  12.100   4.733  1.00 26.21              
ATOM   1942  C   ALA A 272      55.065  11.225   4.645  1.00 27.37              
ATOM   1943  O   ALA A 272      56.033  11.595   3.968  1.00 27.66              
ATOM   1944  CB  ALA A 272      52.894  11.850   3.586  1.00 26.27              
ATOM   1945  N   LEU A 273      55.068  10.104   5.358  1.00 27.84              
ATOM   1946  CA  LEU A 273      56.199   9.177   5.341  1.00 28.46              
ATOM   1947  C   LEU A 273      56.453   8.563   3.962  1.00 28.80              
ATOM   1948  O   LEU A 273      57.578   8.495   3.512  1.00 28.52              
ATOM   1949  CB  LEU A 273      55.959   8.048   6.341  1.00 28.96              
ATOM   1950  CG  LEU A 273      56.102   8.371   7.826  1.00 30.08              
ATOM   1951  CD1 LEU A 273      56.068   7.073   8.624  1.00 30.83              
ATOM   1952  CD2 LEU A 273      57.397   9.139   8.099  1.00 31.08              
ATOM   1953  N   ARG A 274      55.396   8.089   3.316  1.00 29.47              
ATOM   1954  CA  ARG A 274      55.479   7.485   1.980  1.00 29.96              
ATOM   1955  C   ARG A 274      55.585   8.617   0.948  1.00 29.04              
ATOM   1956  O   ARG A 274      54.693   9.450   0.857  1.00 29.46              
ATOM   1957  CB  ARG A 274      54.240   6.613   1.692  1.00 30.00              
ATOM   1958  CG  ARG A 274      54.392   5.143   2.073  1.00 35.03              
ATOM   1959  CD  ARG A 274      53.153   4.227   1.791  1.00 38.22              
ATOM   1960  NE  ARG A 274      52.574   4.430   0.458  1.00 41.00              
ATOM   1961  CZ  ARG A 274      51.646   3.644  -0.099  1.00 44.36              
ATOM   1962  NH1 ARG A 274      51.181   2.573   0.542  1.00 46.19              
ATOM   1963  NH2 ARG A 274      51.193   3.916  -1.323  1.00 45.12              
ATOM   1964  N   PRO A 275      56.671   8.679   0.190  1.00 28.92              
ATOM   1965  CA  PRO A 275      56.848   9.766  -0.785  1.00 28.95              
ATOM   1966  C   PRO A 275      55.659   9.953  -1.724  1.00 29.00              
ATOM   1967  O   PRO A 275      55.349  11.099  -2.068  1.00 29.20              
ATOM   1968  CB  PRO A 275      58.083   9.343  -1.578  1.00 28.80              
ATOM   1969  CG  PRO A 275      58.808   8.417  -0.690  1.00 29.27              
ATOM   1970  CD  PRO A 275      57.798   7.732   0.186  1.00 28.61              
ATOM   1971  N   SER A 276      55.019   8.859  -2.146  1.00 28.92              
ATOM   1972  CA  SER A 276      53.849   8.944  -3.049  1.00 28.76              
ATOM   1973  C   SER A 276      52.600   9.548  -2.380  1.00 28.53              
ATOM   1974  O   SER A 276      51.678   9.965  -3.077  1.00 28.69              
ATOM   1975  CB  SER A 276      53.521   7.580  -3.675  1.00 28.61              
ATOM   1976  OG  SER A 276      53.106   6.645  -2.710  1.00 28.07              
ATOM   1977  N   ASP A 277      52.573   9.590  -1.046  1.00 27.87              
ATOM   1978  CA  ASP A 277      51.467  10.213  -0.299  1.00 27.36              
ATOM   1979  C   ASP A 277      51.614  11.751  -0.178  1.00 27.06              
ATOM   1980  O   ASP A 277      50.709  12.437   0.321  1.00 25.73              
ATOM   1981  CB  ASP A 277      51.369   9.616   1.114  1.00 27.49              
ATOM   1982  CG  ASP A 277      50.765   8.222   1.128  1.00 28.01              
ATOM   1983  OD1 ASP A 277      50.075   7.846   0.143  1.00 22.37              
ATOM   1984  OD2 ASP A 277      50.932   7.441   2.101  1.00 29.32              
ATOM   1985  N   ARG A 278      52.755  12.282  -0.613  1.00 25.97              
ATOM   1986  CA  ARG A 278      53.000  13.714  -0.540  1.00 25.92              
ATOM   1987  C   ARG A 278      52.300  14.395  -1.694  1.00 25.95              
ATOM   1988  O   ARG A 278      52.133  13.793  -2.758  1.00 24.95              
ATOM   1989  CB  ARG A 278      54.500  14.021  -0.579  1.00 25.26              
ATOM   1990  CG  ARG A 278      55.207  13.574   0.670  1.00 25.22              
ATOM   1991  CD  ARG A 278      56.729  13.624   0.610  1.00 24.29              
ATOM   1992  NE  ARG A 278      57.256  12.693   1.578  1.00 24.75              
ATOM   1993  CZ  ARG A 278      58.456  12.121   1.535  1.00 26.25              
ATOM   1994  NH1 ARG A 278      59.322  12.434   0.596  1.00 25.75              
ATOM   1995  NH2 ARG A 278      58.787  11.229   2.464  1.00 25.53              
ATOM   1996  N   PRO A 279      51.911  15.650  -1.486  1.00 26.07              
ATOM   1997  CA  PRO A 279      51.248  16.438  -2.524  1.00 26.49              
ATOM   1998  C   PRO A 279      52.190  16.860  -3.618  1.00 26.93              
ATOM   1999  O   PRO A 279      53.375  16.911  -3.348  1.00 27.22              
ATOM   2000  CB  PRO A 279      50.815  17.689  -1.761  1.00 26.26              
ATOM   2001  CG  PRO A 279      51.798  17.811  -0.702  1.00 26.55              
ATOM   2002  CD  PRO A 279      52.091  16.436  -0.255  1.00 26.10              
ATOM   2003  N   THR A 280      51.680  17.085  -4.837  1.00 27.99              
ATOM   2004  CA  THR A 280      52.488  17.658  -5.908  1.00 27.96              
ATOM   2005  C   THR A 280      52.546  19.174  -5.588  1.00 28.78              
ATOM   2006  O   THR A 280      51.905  19.662  -4.628  1.00 28.26              
ATOM   2007  CB  THR A 280      51.856  17.437  -7.318  1.00 27.30              
ATOM   2008  OG1 THR A 280      50.566  18.053  -7.403  1.00 26.89              
ATOM   2009  CG2 THR A 280      51.569  15.977  -7.620  1.00 26.87              
ATOM   2010  N   PHE A 281      53.319  19.925  -6.366  1.00 28.95              
ATOM   2011  CA  PHE A 281      53.349  21.373  -6.174  1.00 29.60              
ATOM   2012  C   PHE A 281      51.957  21.939  -6.469  1.00 29.32              
ATOM   2013  O   PHE A 281      51.467  22.802  -5.749  1.00 29.97              
ATOM   2014  CB  PHE A 281      54.395  22.034  -7.076  1.00 30.16              
ATOM   2015  CG  PHE A 281      55.815  21.639  -6.759  1.00 31.67              
ATOM   2016  CD1 PHE A 281      56.276  21.639  -5.457  1.00 33.86              
ATOM   2017  CD2 PHE A 281      56.679  21.253  -7.771  1.00 34.05              
ATOM   2018  CE1 PHE A 281      57.576  21.261  -5.151  1.00 35.36              
ATOM   2019  CE2 PHE A 281      57.973  20.871  -7.483  1.00 36.40              
ATOM   2020  CZ  PHE A 281      58.428  20.890  -6.160  1.00 36.75              
ATOM   2021  N   GLU A 282      51.310  21.417  -7.500  1.00 28.16              
ATOM   2022  CA  GLU A 282      49.973  21.875  -7.877  1.00 28.48              
ATOM   2023  C   GLU A 282      49.007  21.683  -6.708  1.00 27.53              
ATOM   2024  O   GLU A 282      48.203  22.565  -6.407  1.00 26.89              
ATOM   2025  CB  GLU A 282      49.461  21.111  -9.113  1.00 27.91              
ATOM   2026  CG  GLU A 282      48.011  21.411  -9.477  1.00 30.52              
ATOM   2027  CD  GLU A 282      47.553  20.705 -10.746  1.00 33.12              
ATOM   2028  OE1 GLU A 282      48.165  19.684 -11.118  1.00 35.64              
ATOM   2029  OE2 GLU A 282      46.564  21.153 -11.364  1.00 35.59              
ATOM   2030  N   GLU A 283      49.119  20.542  -6.031  1.00 26.81              
ATOM   2031  CA  GLU A 283      48.229  20.231  -4.927  1.00 26.04              
ATOM   2032  C   GLU A 283      48.495  21.139  -3.734  1.00 25.67              
ATOM   2033  O   GLU A 283      47.559  21.510  -3.044  1.00 25.93              
ATOM   2034  CB  GLU A 283      48.330  18.767  -4.534  1.00 26.14              
ATOM   2035  CG  GLU A 283      47.482  17.804  -5.381  1.00 26.70              
ATOM   2036  CD  GLU A 283      47.753  16.327  -5.040  1.00 26.90              
ATOM   2037  OE1 GLU A 283      48.925  15.948  -4.865  1.00 28.14              
ATOM   2038  OE2 GLU A 283      46.798  15.544  -4.931  1.00 26.43              
ATOM   2039  N   ILE A 284      49.755  21.482  -3.483  1.00 25.37              
ATOM   2040  CA  ILE A 284      50.100  22.379  -2.362  1.00 25.79              
ATOM   2041  C   ILE A 284      49.519  23.769  -2.620  1.00 25.28              
ATOM   2042  O   ILE A 284      48.858  24.332  -1.770  1.00 26.12              
ATOM   2043  CB  ILE A 284      51.613  22.524  -2.163  1.00 24.99              
ATOM   2044  CG1 ILE A 284      52.233  21.261  -1.595  1.00 25.14              
ATOM   2045  CG2 ILE A 284      51.943  23.709  -1.211  1.00 25.47              
ATOM   2046  CD1 ILE A 284      53.778  21.262  -1.694  1.00 26.94              
ATOM   2047  N   GLN A 285      49.737  24.291  -3.813  1.00 25.32              
ATOM   2048  CA  GLN A 285      49.274  25.627  -4.148  1.00 25.25              
ATOM   2049  C   GLN A 285      47.731  25.734  -4.308  1.00 25.57              
ATOM   2050  O   GLN A 285      47.175  26.847  -4.214  1.00 25.66              
ATOM   2051  CB  GLN A 285      50.013  26.133  -5.375  1.00 25.69              
ATOM   2052  CG  GLN A 285      51.509  26.374  -5.162  1.00 24.01              
ATOM   2053  CD  GLN A 285      52.130  27.101  -6.340  1.00 24.53              
ATOM   2054  OE1 GLN A 285      52.266  26.521  -7.444  1.00 24.28              
ATOM   2055  NE2 GLN A 285      52.495  28.377  -6.134  1.00 23.18              
ATOM   2056  N   ASN A 286      47.066  24.605  -4.558  1.00 24.92              
ATOM   2057  CA  ASN A 286      45.605  24.546  -4.627  1.00 25.53              
ATOM   2058  C   ASN A 286      44.986  24.294  -3.233  1.00 25.99              
ATOM   2059  O   ASN A 286      43.780  24.402  -3.047  1.00 25.81              
ATOM   2060  CB  ASN A 286      45.145  23.472  -5.638  1.00 25.53              
ATOM   2061  CG  ASN A 286      45.213  23.965  -7.098  1.00 25.92              
ATOM   2062  OD1 ASN A 286      45.032  25.145  -7.366  1.00 23.92              
ATOM   2063  ND2 ASN A 286      45.497  23.058  -8.031  1.00 27.71              
ATOM   2064  N   HIS A 287      45.814  23.974  -2.244  1.00 26.32              
ATOM   2065  CA  HIS A 287      45.320  23.697  -0.900  1.00 26.84              
ATOM   2066  C   HIS A 287      44.554  24.897  -0.363  1.00 27.45              
ATOM   2067  O   HIS A 287      44.871  26.046  -0.697  1.00 28.20              
ATOM   2068  CB  HIS A 287      46.497  23.349   0.006  1.00 26.82              
ATOM   2069  CG  HIS A 287      46.114  22.757   1.327  1.00 27.09              
ATOM   2070  ND1 HIS A 287      45.895  23.525   2.450  1.00 25.76              
ATOM   2071  CD2 HIS A 287      45.943  21.470   1.711  1.00 26.63              
ATOM   2072  CE1 HIS A 287      45.610  22.739   3.470  1.00 26.65              
ATOM   2073  NE2 HIS A 287      45.643  21.484   3.052  1.00 27.34              
ATOM   2074  N   PRO A 288      43.499  24.649   0.408  1.00 28.05              
ATOM   2075  CA  PRO A 288      42.726  25.738   1.004  1.00 27.98              
ATOM   2076  C   PRO A 288      43.583  26.708   1.807  1.00 28.08              
ATOM   2077  O   PRO A 288      43.328  27.903   1.703  1.00 28.69              
ATOM   2078  CB  PRO A 288      41.748  25.011   1.922  1.00 28.02              
ATOM   2079  CG  PRO A 288      41.580  23.714   1.331  1.00 27.93              
ATOM   2080  CD  PRO A 288      42.913  23.335   0.725  1.00 27.88              
ATOM   2081  N   TRP A 289      44.572  26.232   2.563  1.00 27.63              
ATOM   2082  CA  TRP A 289      45.425  27.147   3.347  1.00 27.26              
ATOM   2083  C   TRP A 289      46.216  28.147   2.505  1.00 27.78              
ATOM   2084  O   TRP A 289      46.588  29.210   3.002  1.00 27.75              
ATOM   2085  CB  TRP A 289      46.426  26.397   4.224  1.00 26.94              
ATOM   2086  CG  TRP A 289      47.149  27.357   5.127  1.00 26.16              
ATOM   2087  CD1 TRP A 289      46.630  27.997   6.222  1.00 26.06              
ATOM   2088  CD2 TRP A 289      48.498  27.841   4.989  1.00 25.49              
ATOM   2089  NE1 TRP A 289      47.581  28.819   6.781  1.00 24.59              
ATOM   2090  CE2 TRP A 289      48.736  28.735   6.045  1.00 25.24              
ATOM   2091  CE3 TRP A 289      49.537  27.593   4.093  1.00 25.59              
ATOM   2092  CZ2 TRP A 289      49.956  29.393   6.204  1.00 25.59              
ATOM   2093  CZ3 TRP A 289      50.758  28.246   4.266  1.00 24.36              
ATOM   2094  CH2 TRP A 289      50.948  29.134   5.303  1.00 25.63              
ATOM   2095  N   MET A 290      46.503  27.804   1.253  1.00 28.50              
ATOM   2096  CA  MET A 290      47.283  28.678   0.355  1.00 29.59              
ATOM   2097  C   MET A 290      46.496  29.724  -0.439  1.00 30.38              
ATOM   2098  O   MET A 290      47.083  30.451  -1.240  1.00 29.96              
ATOM   2099  CB  MET A 290      48.021  27.814  -0.673  1.00 29.60              
ATOM   2100  CG  MET A 290      49.043  26.889  -0.062  1.00 30.23              
ATOM   2101  SD  MET A 290      50.664  27.470  -0.354  1.00 33.74              
ATOM   2102  CE  MET A 290      50.733  28.684   0.913  1.00 32.90              
ATOM   2103  N   GLN A 291      45.187  29.800  -0.235  1.00 31.50              
ATOM   2104  CA  GLN A 291      44.348  30.692  -1.029  1.00 32.52              
ATOM   2105  C   GLN A 291      44.448  32.145  -0.580  1.00 32.60              
ATOM   2106  O   GLN A 291      44.704  32.419   0.587  1.00 32.83              
ATOM   2107  CB  GLN A 291      42.887  30.199  -1.013  1.00 33.33              
ATOM   2108  CG  GLN A 291      42.650  28.890  -1.825  1.00 35.72              
ATOM   2109  CD  GLN A 291      43.030  29.025  -3.308  1.00 40.06              
ATOM   2110  OE1 GLN A 291      43.792  28.206  -3.851  1.00 44.43              
ATOM   2111  NE2 GLN A 291      42.512  30.065  -3.956  1.00 42.84              
ATOM   2112  N   ASP A 292      44.267  33.062  -1.532  1.00 32.96              
ATOM   2113  CA  ASP A 292      44.293  34.507  -1.284  1.00 32.87              
ATOM   2114  C   ASP A 292      45.627  35.009  -0.747  1.00 32.05              
ATOM   2115  O   ASP A 292      45.673  35.700   0.268  1.00 31.31              
ATOM   2116  CB  ASP A 292      43.163  34.909  -0.332  1.00 33.10              
ATOM   2117  CG  ASP A 292      41.820  34.508  -0.856  1.00 35.27              
ATOM   2118  OD1 ASP A 292      41.389  35.091  -1.885  1.00 36.88              
ATOM   2119  OD2 ASP A 292      41.147  33.587  -0.331  1.00 39.01              
ATOM   2120  N   VAL A 293      46.708  34.650  -1.435  1.00 31.45              
ATOM   2121  CA  VAL A 293      48.036  35.076  -1.041  1.00 29.67              
ATOM   2122  C   VAL A 293      48.192  36.575  -1.245  1.00 28.98              
ATOM   2123  O   VAL A 293      47.606  37.178  -2.139  1.00 27.08              
ATOM   2124  CB  VAL A 293      49.171  34.319  -1.806  1.00 30.37              
ATOM   2125  CG1 VAL A 293      49.194  34.659  -3.303  1.00 29.13              
ATOM   2126  CG2 VAL A 293      50.538  34.644  -1.183  1.00 30.15              
ATOM   2127  N   LEU A 294      48.987  37.186  -0.391  1.00 28.22              
ATOM   2128  CA  LEU A 294      49.271  38.593  -0.545  1.00 28.09              
ATOM   2129  C   LEU A 294      50.242  38.694  -1.697  1.00 28.36              
ATOM   2130  O   LEU A 294      50.963  37.748  -1.979  1.00 28.49              
ATOM   2131  CB  LEU A 294      49.945  39.140   0.709  1.00 27.63              
ATOM   2132  CG  LEU A 294      49.090  39.252   1.971  1.00 27.02              
ATOM   2133  CD1 LEU A 294      49.917  39.907   3.062  1.00 27.62              
ATOM   2134  CD2 LEU A 294      47.785  40.023   1.712  1.00 26.85              
ATOM   2135  N   LEU A 295      50.256  39.834  -2.370  1.00 28.55              
ATOM   2136  CA  LEU A 295      51.256  40.091  -3.384  1.00 29.18              
ATOM   2137  C   LEU A 295      52.492  40.456  -2.573  1.00 29.59              
ATOM   2138  O   LEU A 295      52.369  40.798  -1.397  1.00 28.53              
ATOM   2139  CB  LEU A 295      50.855  41.258  -4.292  1.00 29.34              
ATOM   2140  CG  LEU A 295      49.600  41.104  -5.165  1.00 30.88              
ATOM   2141  CD1 LEU A 295      49.223  42.446  -5.794  1.00 30.83              
ATOM   2142  CD2 LEU A 295      49.811  40.062  -6.254  1.00 32.07              
ATOM   2143  N   PRO A 296      53.681  40.403  -3.176  1.00 30.31              
ATOM   2144  CA  PRO A 296      54.906  40.702  -2.429  1.00 30.19              
ATOM   2145  C   PRO A 296      54.946  42.116  -1.848  1.00 30.35              
ATOM   2146  O   PRO A 296      55.208  42.252  -0.649  1.00 29.94              
ATOM   2147  CB  PRO A 296      55.999  40.490  -3.475  1.00 30.48              
ATOM   2148  CG  PRO A 296      55.374  39.523  -4.443  1.00 30.89              
ATOM   2149  CD  PRO A 296      53.975  40.066  -4.585  1.00 30.37              
ATOM   2150  N   GLN A 297      54.649  43.141  -2.652  1.00 30.19              
ATOM   2151  CA  GLN A 297      54.696  44.509  -2.146  1.00 30.50              
ATOM   2152  C   GLN A 297      53.725  44.673  -0.960  1.00 29.76              
ATOM   2153  O   GLN A 297      54.076  45.280   0.053  1.00 29.01              
ATOM   2154  CB  GLN A 297      54.453  45.532  -3.271  1.00 30.85              
ATOM   2155  CG  GLN A 297      54.845  46.998  -2.949  1.00 33.05              
ATOM   2156  CD  GLN A 297      56.159  47.159  -2.160  1.00 36.17              
ATOM   2157  OE1 GLN A 297      57.250  46.921  -2.689  1.00 35.98              
ATOM   2158  NE2 GLN A 297      56.046  47.595  -0.900  1.00 37.81              
ATOM   2159  N   GLU A 298      52.531  44.099  -1.073  1.00 29.64              
ATOM   2160  CA  GLU A 298      51.561  44.122   0.027  1.00 29.53              
ATOM   2161  C   GLU A 298      52.189  43.492   1.267  1.00 28.82              
ATOM   2162  O   GLU A 298      52.065  44.026   2.367  1.00 28.48              
ATOM   2163  CB  GLU A 298      50.267  43.376  -0.342  1.00 29.90              
ATOM   2164  CG  GLU A 298      49.333  44.187  -1.225  1.00 30.66              
ATOM   2165  CD  GLU A 298      48.202  43.386  -1.865  1.00 32.67              
ATOM   2166  OE1 GLU A 298      48.039  42.157  -1.594  1.00 31.78              
ATOM   2167  OE2 GLU A 298      47.465  44.017  -2.669  1.00 34.21              
ATOM   2168  N   THR A 299      52.877  42.367   1.081  1.00 28.17              
ATOM   2169  CA  THR A 299      53.556  41.690   2.200  1.00 28.09              
ATOM   2170  C   THR A 299      54.603  42.610   2.880  1.00 27.67              
ATOM   2171  O   THR A 299      54.699  42.660   4.098  1.00 27.43              
ATOM   2172  CB  THR A 299      54.194  40.376   1.721  1.00 27.93              
ATOM   2173  OG1 THR A 299      53.199  39.563   1.090  1.00 27.43              
ATOM   2174  CG2 THR A 299      54.689  39.519   2.883  1.00 28.15              
ATOM   2175  N   ALA A 300      55.375  43.343   2.091  1.00 27.73              
ATOM   2176  CA  ALA A 300      56.341  44.278   2.650  1.00 28.51              
ATOM   2177  C   ALA A 300      55.641  45.404   3.449  1.00 29.16              
ATOM   2178  O   ALA A 300      56.075  45.772   4.527  1.00 29.16              
ATOM   2179  CB  ALA A 300      57.200  44.880   1.553  1.00 28.35              
ATOM   2180  N   GLU A 301      54.542  45.917   2.922  1.00 30.30              
ATOM   2181  CA  GLU A 301      53.833  47.039   3.545  1.00 31.12              
ATOM   2182  C   GLU A 301      53.218  46.666   4.908  1.00 31.24              
ATOM   2183  O   GLU A 301      53.287  47.434   5.867  1.00 30.78              
ATOM   2184  CB  GLU A 301      52.776  47.598   2.564  1.00 31.53              
ATOM   2185  CG  GLU A 301      53.379  48.424   1.417  1.00 33.35              
ATOM   2186  CD  GLU A 301      52.430  48.753   0.256  1.00 35.64              
ATOM   2187  OE1 GLU A 301      51.345  48.139   0.104  1.00 36.82              
ATOM   2188  OE2 GLU A 301      52.797  49.645  -0.539  1.00 37.35              
ATOM   2189  N   ILE A 302      52.661  45.465   4.999  1.00 31.95              
ATOM   2190  CA  ILE A 302      52.010  45.010   6.220  1.00 32.60              
ATOM   2191  C   ILE A 302      52.974  44.458   7.268  1.00 32.96              
ATOM   2192  O   ILE A 302      52.848  44.794   8.441  1.00 33.09              
ATOM   2193  CB  ILE A 302      50.961  43.918   5.886  1.00 32.76              
ATOM   2194  CG1 ILE A 302      49.889  44.465   4.928  1.00 34.45              
ATOM   2195  CG2 ILE A 302      50.303  43.400   7.164  1.00 33.04              
ATOM   2196  CD1 ILE A 302      48.914  43.397   4.400  1.00 34.84              
ATOM   2197  N   HIS A 303      53.945  43.648   6.832  1.00 33.36              
ATOM   2198  CA  HIS A 303      54.831  42.901   7.733  1.00 33.87              
ATOM   2199  C   HIS A 303      56.311  43.252   7.795  1.00 35.07              
ATOM   2200  O   HIS A 303      56.986  42.875   8.754  1.00 34.90              
ATOM   2201  CB  HIS A 303      54.777  41.427   7.359  1.00 33.71              
ATOM   2202  CG  HIS A 303      53.459  40.788   7.617  1.00 31.82              
ATOM   2203  ND1 HIS A 303      52.425  40.834   6.712  1.00 32.01              
ATOM   2204  CD2 HIS A 303      53.012  40.067   8.668  1.00 31.05              
ATOM   2205  CE1 HIS A 303      51.389  40.181   7.200  1.00 31.35              
ATOM   2206  NE2 HIS A 303      51.718  39.710   8.387  1.00 31.91              
ATOM   2207  N   LEU A 304      56.839  43.880   6.755  1.00 36.17              
ATOM   2208  CA  LEU A 304      58.247  44.246   6.723  1.00 37.30              
ATOM   2209  C   LEU A 304      58.365  45.772   6.831  1.00 39.26              
ATOM   2210  O   LEU A 304      59.404  46.332   6.501  1.00 39.65              
ATOM   2211  CB  LEU A 304      58.907  43.724   5.440  1.00 36.93              
ATOM   2212  CG  LEU A 304      59.222  42.218   5.230  1.00 36.47              
ATOM   2213  CD1 LEU A 304      58.414  41.315   6.112  1.00 33.98              
ATOM   2214  CD2 LEU A 304      59.108  41.769   3.740  1.00 34.59              
ATOM   2215  N   HIS A 305      57.292  46.413   7.318  1.00 41.28              
ATOM   2216  CA  HIS A 305      57.170  47.871   7.491  1.00 43.00              
ATOM   2217  C   HIS A 305      57.855  48.668   6.374  1.00 43.85              
ATOM   2218  O   HIS A 305      58.818  49.396   6.608  1.00 44.64              
ATOM   2219  CB  HIS A 305      57.636  48.314   8.893  1.00 43.28              
ATOM   2220  CG  HIS A 305      59.116  48.216   9.100  1.00 44.95              
ATOM   2221  ND1 HIS A 305      59.780  47.008   9.164  1.00 46.84              
ATOM   2222  CD2 HIS A 305      60.061  49.175   9.250  1.00 46.36              
ATOM   2223  CE1 HIS A 305      61.073  47.228   9.341  1.00 47.39              
ATOM   2224  NE2 HIS A 305      61.270  48.534   9.397  1.00 47.18              
ATOM   2225  N   SER A 306      57.329  48.518   5.160  1.00 44.79              
ATOM   2226  CA  SER A 306      57.856  49.179   3.965  1.00 45.23              
ATOM   2227  C   SER A 306      56.723  49.956   3.287  1.00 45.80              
ATOM   2228  O   SER A 306      56.481  51.135   3.605  1.00 45.99              
ATOM   2229  CB  SER A 306      58.461  48.143   2.997  1.00 45.14              
ATOM   2230  OG  SER A 306      58.266  48.516   1.637  1.00 44.68              
TER
ENDMDL
MODEL        2
ATOM      1  N1  MOL     2      73.527  34.346   5.568  1.00  0.00              
ATOM      2  C2  MOL     2      73.557  33.153   6.054  1.00  0.00              
ATOM      3  C3  MOL     2      73.545  32.945   7.453  1.00  0.00              
ATOM      4  C4  MOL     2      73.496  34.146   8.321  1.00  0.00              
ATOM      5  C5  MOL     2      73.499  35.455   6.219  1.00  0.00              
ATOM      6  C6  MOL     2      73.479  35.379   7.691  1.00  0.00              
ATOM      7  N7  MOL     2      73.441  36.376   8.640  1.00  0.00              
ATOM      8  C8  MOL     2      73.463  34.383   9.695  1.00  0.00              
ATOM      9  C9  MOL     2      73.430  35.766   9.881  1.00  0.00              
ATOM     10  C10 MOL     2      73.584  31.646   7.968  1.00  0.00              
ATOM     11  C11 MOL     2      73.601  32.026   5.221  1.00  0.00              
ATOM     12  C12 MOL     2      73.639  30.735   5.745  1.00  0.00              
ATOM     13  C13 MOL     2      73.632  30.543   7.120  1.00  0.00              
ATOM     14  C14 MOL     2      73.456  33.543  10.807  1.00  0.00              
ATOM     15  C15 MOL     2      73.391  36.340  11.150  1.00  0.00              
ATOM     16  C16 MOL     2      73.417  34.108  12.086  1.00  0.00              
ATOM     17  C17 MOL     2      73.385  35.496  12.261  1.00  0.00              
ATOM     18  N18 MOL     2      73.487  36.616   5.643  1.00  0.00              
ATOM     19  N19 MOL     2      73.492  36.559   4.383  1.00  0.00              
ATOM     20  C20 MOL     2      73.484  37.537   3.556  1.00  0.00              
ATOM     21  C21 MOL     2      73.481  37.162   2.117  1.00  0.00              
ATOM     22  N22 MOL     2      73.486  35.848   1.842  1.00  0.00              
ATOM     23  C23 MOL     2      73.475  35.368   0.591  1.00  0.00              
ATOM     24  C24 MOL     2      73.458  36.242  -0.500  1.00  0.00              
ATOM     25  C25 MOL     2      73.461  37.617  -0.253  1.00  0.00              
ATOM     26  C26 MOL     2      73.470  38.078   1.062  1.00  0.00              
ATOM     27  C27 MOL     2      73.433  35.710  -1.924  1.00  0.00              
ATOM     28  N28 MOL     2      73.961  34.348  -2.001  1.00  0.00              
ATOM     29  C29 MOL     2      73.581  33.698  -3.254  1.00  0.00              
ATOM     30  C30 MOL     2      75.420  34.310  -1.895  1.00  0.00              
ATOM     31  C31 MOL     2      74.124  32.261  -3.317  1.00  0.00              
ATOM     32  O32 MOL     2      75.541  32.278  -3.205  1.00  0.00              
ATOM     33  C33 MOL     2      75.939  32.866  -1.973  1.00  0.00              
ATOM     34 Cu34 MOL     2      73.509  34.894   3.490  1.00  0.00              
ATOM     35  H35 MOL     2      73.420  37.433   8.439  1.00  0.00              
ATOM     36  H36 MOL     2      73.582  31.458   9.048  1.00  0.00              
ATOM     37  H37 MOL     2      73.609  32.114   4.125  1.00  0.00              
ATOM     38  H38 MOL     2      73.676  29.866   5.065  1.00  0.00              
ATOM     39  H39 MOL     2      73.664  29.522   7.535  1.00  0.00              
ATOM     40  H40 MOL     2      73.477  32.449  10.707  1.00  0.00              
ATOM     41  H41 MOL     2      73.364  37.436  11.265  1.00  0.00              
ATOM     42 Br42 MOL     2      73.406  32.973  13.608  1.00  0.00              
ATOM     43  H43 MOL     2      73.353  35.928  13.276  1.00  0.00              
ATOM     44  C44 MOL     2      73.476  38.957   4.094  1.00  0.00              
ATOM     45  H45 MOL     2      73.477  34.276   0.424  1.00  0.00              
ATOM     46  H46 MOL     2      73.449  38.332  -1.094  1.00  0.00              
ATOM     47  H47 MOL     2      73.466  39.164   1.246  1.00  0.00              
ATOM     48  H48 MOL     2      72.374  35.718  -2.267  1.00  0.00              
ATOM     49  H49 MOL     2      73.998  36.381  -2.610  1.00  0.00              
ATOM     50  H50 MOL     2      72.471  33.669  -3.337  1.00  0.00              
ATOM     51  H51 MOL     2      73.960  34.284  -4.124  1.00  0.00              
ATOM     52  H52 MOL     2      75.884  34.923  -2.703  1.00  0.00              
ATOM     53  H53 MOL     2      75.739  34.755  -0.925  1.00  0.00              
ATOM     54  H54 MOL     2      73.848  31.789  -4.287  1.00  0.00              
ATOM     55  H55 MOL     2      73.686  31.634  -2.507  1.00  0.00              
ATOM     56  H56 MOL     2      77.052  32.854  -1.915  1.00  0.00              
ATOM     57  H57 MOL     2      75.557  32.258  -1.121  1.00  0.00              
ATOM     58 Cl58 MOL     2      71.634  33.930   3.081  1.00  0.00              
ATOM     59 Cl59 MOL     2      75.412  33.997   3.052  1.00  0.00              
ATOM     60  H60 MOL     2      73.471  37.531   6.202  1.00  0.00              
ATOM     61  H61 MOL     2      72.527  39.178   4.631  1.00  0.00              
ATOM     62  H62 MOL     2      73.571  39.715   3.289  1.00  0.00              
ATOM     63  H63 MOL     2      74.323  39.127   4.795  1.00  0.00              
TER
ENDMDL
